# Supplementary material for: Crotamiton derivative JM03 extends lifespan and improves oxidative and hypertonic stress resistance in Caenorhabditis elegans via inhibiting OSM-9
Source: eLife. 2022 May 5;11:e72410. doi: 10.7554/eLife.72410 (PMC9071264; doi:10.7554/eLife.72410)
Supplement: Figure 1—source data 1. [file elife-72410-fig1-data1.xlsx]

## Sheet: 1st round screening-1
Drug Name	CAS Number	Molecular Number	Concentration (μM)	lifespan of each worm (days)															Mean Lifespan (days)	Lifespan Extension % (of Ctrl)
				1st	2nd	3rd	4th	5th	6th	7th	8th	9th	10th	11th	12th	13th	14th	15th
Control group			0	2	9	11	14	15	16	19	21	21	22	22	22	22	22	24	17.4667
timonacic	444-27-9	133.17	100	3	6	10	10	11	11	11	12	15	15	16	16	18	18	19	12.7333	-27.1131
procarbazine hydrochloride	366-70-1	257.76	100	3	3	9	10	10	14	14	16	16	16	17	17	17	17	17	13.0667	-25.2051
decitabine	2353-33-5	228.21	100	2	3	9	14	15	15	15	16	16	17	17	19	20	20	22	14.6667	-16.0466
vandetanib	443913-73-3	475.35	100	4	4	4	4	4	5	7	8	10	10	10	10	13	15	15	8.2	-53.0624
pirfenidone	53179-13-8	185.22	100	2	2	8	11	11	11	12	12	14	16	17	18	18	19	19	12.6667	-27.4948
lenalidomide	191732-72-6	259.26	100	8	8	10	10	10	10	10	10	10	10	10	10	10	10	10	9.73333	-44.2854
exemestane	107868-30-4	296.4	100	3	3	9	10	11	11	12	13	15	15	15	17	17	20	20	12.7333	-27.1131
lomustine	13010-47-4	233.7	100	5	8	8	9	9	10	12	16	16	16	16	18	20	20	20	13.5333	-22.5339
sunitinib malate	341031-54-7	532.566	100	2	4	6	10	10	13	14	14	14	16	16	19	19	23	23	13.5333	-22.5339
mitoxantrone hydrochloride	70476-82-3	517.4	100	6	10	12	13	15	15	16	16	16	16	16	17	17	17	17	14.6	-16.4282
(S)-4,4'-(1-methyl-1,2-ethanediyl)bis-2,6-piperazinedione hydrochloride	149003-01-0	304.732	100	2	3	7	7	7	7	9	11	14	14	15	15	16	17	17	10.7333	-38.5613
lapatinib ditosylate	388082-78-8	925.46	100	3	6	6	9	10	12	12	13	13	14	14	14	15	15	15	11.4	-34.7453

## Sheet: 1st round screening-2
Drug Name	CAS Number	Molecular Number	Concentration (μM)	lifespan of each worm (days)															Mean Lifespan (days)	Lifespan Extension % (of Ctrl)
				1st	2nd	3rd	4th	5th	6th	7th	8th	9th	10th	11th	12th	13th	14th	15th
Control group			0	5	5	11	14	14	14	16	17	17	17	17	17	18			14.7857
				11	12	12	14	14	14	14	14	14	16	17	17	18	21	24
ramipril	87333-19-5/87269-97-4	388.46	100	2	2	2	7	9	11	11	12	14	14	15	15	17	17	17	11	-25.6254
captopril	62571-86-2	217.29	100	1	1	2	9	10	11	11	14	14	14	15	17	17	20	20	11.7333	-20.6671
cilnidipine	132203-70-4	492.52	100	1	1	1	1	1	2	2	3	3	8	9	9	9	14	15	5.26667	-64.3904
minoxidil	38304-91-5	209.25	100	1	1	1	8	9	10	13	13	15	15	15	17	20			10.6154	-28.2259
lacidipine	103890-78-4	455.54	100	1	1	1	1	1	3	5	5	7	8	13	17	17			6.15385	-58.3918
lisinopril dihydrate	83915-83-7	405.49	100	6	8	8	9	9	10	10	10	12	13	13	14	14	15	19	11.3333	-23.3716
felodipine	72509-76-3	384.25	100	1	3	4	5	5	5	6	6	13	15	15					7.09091	-52.0561
felodipine	555-30-6	211.21	100	2	14	14	14	15	16	16	17	17	18	22	15	15	15	15	15	1.41988
methyldopa	63-92-3	340.29	100	9	10	10	10	11	11	11	15	15	17	17	17				12.75	-13.7931
phenoxybenzamine hydrochloride	110221-44-8	513.07	100	6	12	13	14	14	14	15	16	17	17	17	17	18	21	22	15.5333	5.02592
clonidine hydrochloride	4205-91-8	266.55	100	10	11	13	13	13	15	16	18	18	18	19					14.9091	0.805212
nicardipine hydrochloride	54527-84-3	515.99	100	1	2	6	7	8	9	9	10	11	11	13	14	15			8.92308	-39.6682
irbesartan	138402-11-6	428.53	100	1	1	5	6	8	9	10	11	11	13	13	14	15	9	9	9	-39.1481
metroprolol succinate	98418-47-4	652.82	100	5	10	10	12	14	15	15	15	15	16	18					13.1818	-10.8734
diazoxide	364-98-7	230.67	100	4	4	5	5	6	9	10	11	13	13	13	14	14	15	20	10.4	-29.6822
nitrendipine	39562-70-4	360.36	100	2	2	2	5	5	9	12	14	14	14	15	15	15	15		9.92857	-32.8697
nisoldipine	63675-72-9	388.41	100	1	1	1	2	3	4	6	9	9	10	11	12	13	13		6.78571	-54.1196
azilsartan	147403-03-0	456.45	100	6	12	14	15	15	15	17	18	18	19	20	21	21	21	24	17.0667	15.3933
doxazosin mesylate	77883-43-3	547.58	100	2	10	12	12	13	14	14	15	15	15	16	17	18			13.3077	-10.0224
enalaprilat	76420-72-9	348.39	100	4	6	10	12	13	14	14	14	14	14	15	15	15	18	19	13.1333	-11.2013
metolazone	17560-51-9	365.83	100	5	8	10	10	13	15	16	17	17	17	17	17	18	18		14.1429	-4.37554
pargyline hydrochloride	306-07-0	195.69	100	2	15	15	16	16	17	17	17	17	18	19	19	19	20		16.2143	9.63006
azelnidipine	123524-52-7	582.65	100	3	3	3	5	6	7	9	14	14	15	17	17	18	10	10	10.0667	-31.936
hydralazine hydrochloride	304-20-1	196.64	100	1	1	8	9	9	10	11	11	12	13	14	14	15	15	17	10.6667	-27.8792
candesartan	139481-59-7	440.45	100	1	2	5	10	12	14	14	14	14	15	17	17	20	21	21	13.1333	-11.2013
carteolol hydrochloride	51781-21-6	328.83	100	6	10	11	11	11	14	14	15	15	15	17	17	17	17		13.5714	-8.23916
quinapril hydrochloride	82586-55-8	474.98	100	8	10	11	12	14	15	15	15	15	16	17	17	18	19	20	14.8	0.0676133
eprosartan mesylate	144143-96-4	520.62	100	2	5	9	11	11	11	12	13	14	15	17					10.9091	-26.2401
hyodeoxycholic acid	83-49-8	392.57	100	1	10	10	11	12	12	14	14	15	15	15	19				12.3333	-16.6103
bevantolol hydrochloride	42864-78-8	381.89	100	3	6	8	14	14	14	14	15	15	16	17	17	21			13.3846	-9.50226
benidipine hydrochloride	91599-74-5	505.56	100	1	4	6	7	8	8	8	8	8	9	9	11	11	13	15	8.4	-43.2049
lercanidipine hydrochloride	132866-11-6	648.19	100	1	1	1	1	2	5	7	10	10	12	13	14	15	15	17	8.26667	-44.1064
(S)-timolol maleate	26921-17-5	432.49	100	8	8	10	10	10	13	13	13	13	14	14	15	15	15	15	12.4	-16.1596
moxonidine	75438-57-2	241.68	100	1	5	10	10	11	12	14	14	14	14	15	15	16	17	12	12	-18.8641
celiprolol hydrochloride	57470-78-7	415.95	100	9	9	13	14	15	15	15	17	17	17	18	18	18	19		15.2857	3.35169
labetalol hydrochloride	32780-64-6	364.87	100	1	5	8	9	10	14	14	15	15	16	16	17	18	20		12.7143	-14.0346
eplerenone	107724-20-9	414.49	100	8	14	15	15	16	16	16	17	17	17	19	20	20	20		16.4286	11.0789
2-benzyl-1H-benzimidazole monohydrochloride	1212-48-2	244.72	100	11	12	14	14	15	15	15	17	17	17	17	17	18	19	20	15.8667	7.27969
manidipine hydrochloride	89226-75-5	683.62	100	1	1	5	6	6	7	9	9	11	11	11	12	13	14		8.28571	-43.9776
perindopril erbumine	107133-36-8	441.61	100	6	6	10	12	14	15	15	15	17	17	17	18	19	20	20	14.7333	-0.383142
prazosin hydrochloride	19237-84-4	419.86	100	1	1	8	10	10	10	13	13	13	14	15	16	16	17	17	11.6	-21.5686
guanabenz acetate	23256-50-0	291.13	100	5	5	5	5	5	5	6	6	8	9	13	13	14	14	14	8.46667	-42.7541
guanethidine sulfate	645-43-2	296.39	100	4	13	15	15	15	16	17	17	18	20	20	20	22	22		16.7143	13.0107
LCZ696	936623-90-4	970.02	100	6	10	12	14	15	15	15	15	16	18	18	18	19	19	15	15	1.41988
pitavastatin calcium	147526-32-7	880.98	100	6	6	7	9	10	11	12	13	13	14	14	14	14	14	15	11.4667	-22.4701
rosuvastatin calcium	147098-20-2	1001.14	100	5	8	9	10	10	10	10	10	11	11	13	13	14	14	15	10.8667	-26.5269
fenofibrate	49562-28-9	360.83	100	5	5	6	8	8	9	9	10	10	10	11	11	11	17	17	9.8	-33.739
simvastatin	79902-63-9	418.57	100	1	2	6	15	15	15	15	15	15	18	21	22	22	14	14	14	-5.34145
bezafibrate	41859-67-0	361.82	100	2	5	6	6	6	10	11	12	14	14	14	15	15	15		10.3571	-29.972
pravastatin sodium	81131-70-6	446.51	100	6	7	10	10	10	11	11	11	13	13	14	15	15	16	17	11.9333	-19.3149
vitamin E nicotinate	16676-75-8	535.8	100	5	5	5	11	11	11	14	14	15	15	18	18	18			12.3077	-16.7837
atorvastatin calcium	134523-03-8	1155.36	100	1	1	3	3	4	4	4	4	4	4	4	4	4	4	4	3.46667	-76.5607
probucol	23288-49-5	516.84	100	1	5	8	9	11	11	12	13	13	15	15	15	19			11.3077	-23.545
ezetimibe	163222-33-1	409.43	100	1	2	10	11	12	12	13	14	15	15	16	16	18	20	21	13.0667	-11.652
lovastatin	75330-75-5	404.54	100	1	1	1	2	10	10	10	13	14	15	15	17	20	20	21	11.3333	-23.3716
gemfibrozil	25812-30-0	250.33	100	8	9	9	9	9	9	9	10	10	10	11	12	13	13	14	10.3333	-30.133
rosuvastatin	287714-41-4	481.54	100	1	3	3	4	4	5	11	11	13	13	14	14	15	16	19	9.73333	-34.1898
colesevelam	182815-44-7	552.38	100	1	9	11	14	15	15	15	15	16	17	17	18				13.5833	-8.15867
2-propen-1-amine polymer with (chloromethyl)oxirane carbonate	845273-93-0	211.64	100	2	3	3	3	3	4	4	4	4	5	11	12	13	14	15	6.66667	-54.9245
clofibrate	637-07-0	242.7	100	1	10	10	12	12	14	14	16	17	17	18	20	20			13.9231	-5.86155
acipimox	51037-30-0	154.12	100	1	1	1	3	3	7	7	8	11	12	13	14	17	17	20	9	-39.1481
chondroitin sulfate	9007-28-7	463.06	100	3	3	5	7	10	11	14	15	16	16	16	17	18	21		12.2857	-16.9323
fluvastatin sodium salt	93957-55-2	433.45	100	2	2	10	10	11	11	11	12	12	13	13	14	18	23		11.5714	-21.7618
1H-Pyrrole-1-heptanoic acid, 2-(4-fluorophenyl)-β,δ-dihydroxy-4-[[[4-(hydroxymethyl)phenyl]amino]carbonyl]-5-(1-methylethyl)-3-phenyl-, calcium salt (2:1), (βR,δR)-	805241-64-9/951631-53-1	627.74	100	1	2	4	6	7	10	11	11	11	14	14	14	15	15		9.64286	-34.8015
cilostazol	73963-72-1	369.46	100	1	1	1	1	1	1	6	9	11	12	14	16	16	20	20	8.66667	-41.4018
calcium dobesilate	20123-80-2	436.43	100	1	7	9	11	13	14	14	16	16	17	17	18	18	19		13.5714	-8.23916
bosentan hydrate	157212-55-0	601.71	100	1	2	2	8	10	10	12	14	15	16	16	18	20	21		11.7857	-20.313
dipyridamole	58-32-2	504.63	100	7	10	11	11	12	14	14	15	15	16	16	16	16	20		13.7857	-6.7903
ozagrel	82571-53-7	228.25	100	1	2	2	3	3	9	12	12	12	13	15	19				8.58333	-41.9653
etamsylate	2624-44-4	263.31	100	1	2	2	5	12	12	13	15	16	16	16	17	18	22	23	12.6667	-14.3565
troxerutin	7085-55-4	742.68	100	1	4	5	5	5	5	5	17	17	18	18	20	22	24	25	12.7333	-13.9058
apixaban	503612-47-3	459.5	100	1	1	1	6	8	14	16	17	17	23						10.4	-29.6822
dabigatran etexilate mesylate	872728-81-9	723.84	100	1	1	1	2	2	2	3	11	11	16	17	22				7.41667	-49.8535
rivaroxaban	366789-02-8	435.88	100	1	6	6	10	10	10	13	14	14	16	16	18	19	20	20	12.8667	-13.0043
heparin sodium	9041-08-1	590.95	100	2	2	3	5	8	10	10	10	12	16	17	20	21	22		11.2857	-23.6936
propyl gallate	121-79-9	212.2	100	3	9	10	13	13	14	14	14	14	14	15	16	19			12.9231	-12.6229
nafamostat mesylate	82956-11-4	443.48	100	1	4	5	6	8	8	9	9	9	9	9	10	12	14	16	8.6	-41.8526
lanthanum carbonate	6487-39-4	457.85	100	11	14	14	15	16	17	19	21	21							16.4444	11.1862
carbazochrome sodium sulfonate	51460-26-5	376.32	100	4	8	9	10	11	11	12	13	16	16	16	16	18			12.3077	-16.7837
cepharanthine	481-49-2	606.71	100	5	5	5	14	16	17	18	19	19	22	14	14	14	14	14	14	-5.34145
6-aminocaproic acid	60-32-2	131.17	100	1	1	1	2	2	3	14	15	17	19	21	21	22	23		11.5714	-21.7618
2-phenyl-1,3-indandione	83-12-5	222.24	100	2	2	5	8	8	10	14	15	17	19	21	21	22	23		13.3571	-9.68801
ticlopidine hydrochloride	53885-35-1	300.25	100	1	1	4	12	13	13	14	14	14	15	18	19	21	22	23	13.6	-8.04598
piperazine ferulate	171876-65-6	280.32	100	1	1	10	11	15	15	16	17	19	20	20	20	22			14.3846	-2.74094
indobufen	63610-08-2	295.33	100	1	1	9	10	11	13	13	13	13	14	14	14	16	18		11.4286	-22.7277
deferasirox	201530-41-8	373.36	100	3	5	9	13	13	13	14	14	16	16	20	20	21	22	22	14.7333	-0.383142
prasugrel	150322-43-3	373.44	100	1	1	1	1	1	1	1	1	15	15	15	15	15	17		7.14286	-51.7048
iloperidone	133454-47-4	426.48	100	1	1	1	3	3	14	14	15	15	17	19	20	20	20	21	12.2667	-17.0611
enoxaparin sodium	679809-58-6	1980.72	100	1	1	5	5	7	12	13	13	13	16	16	18	18			10.6154	-28.2259
dabigatran etexilate	211915-06-9	627.74	100	1	1	1	1	8	8	8	12	13	16	17	19	20	21	22	11.2	-24.2732
fasudil	103745-39-7	378.32	100	4	9	16	17	19	20	20	20	20	20	23					17.0909	15.5572
oxiracetam	62613-82-5	158.16	100	2	2	2	9	10	12	15	15	15	15	19	20	21	21		12.7143	-14.0346
ligustrazine hydrochloride	76494-51-4	172.66	100	1	1	3	9	10	10	10	13	13	14	15	16	16	18		10.6429	-28.0402
warfarin	81-81-2	308.33	100	12	13	15	15	15	15	16	16	17	17	18	19	20	16	16	16	8.1812
diosmin	520-27-4	608.54	100	11	14	14	14	15	15	16	16	16	17	20					15.2727	3.26388
sodium ferulic	24276-84-4	216.17	100	10	10	10	11	11	11	12	13	13	14	14	15	16			12.3077	-16.7837
1-[3-(2,4,6-trimethoxybenzoyl)propyl]pyrrolidinium chloride	35543-24-9	371.9	100	4	6	10	10	10	11	11	15	15	16	17	17	20	20	20	13.4667	-8.94749
pyrithioxin dihydrochloride	10049-83-9	441.39	100	7	10	10	10	11	15	15	16	17	17	17	21				13.8333	-6.46833
ticagrelor	274693-27-5	522.57	100	2	4	5	5	6	6	8	13	15	18	19	19	22	25	28	13	-12.1028
nimodipine	66085-59-4	418.44	100	4	5	13	14	14	14	14	16	18	20						13.2	-10.7505
stugeron	298-57-7	368.51	100	1	1	2	3	5	6	6	7	12	12	12	13	14	14	14	8.13333	-45.0079
xanthinol nicotinate	437-74-1	434.45	100	1	1	2	4	7	10	12	13	13	14	14	15	15	15	16	10.1333	-31.4852
ambrisentan	177036-94-1	378.42	100	5	7	8	9	13	13	14	14	15	17						11.5	-22.2448
5-methyl-2-phenyl-1,2-dihydropyrazol-3-one	89-25-8	174.2	100	6	12	14	14	14	15	15	15	15	16	16	17	19	21		14.9286	0.936926
citicoline sodium	33818-15-4	510.31	100	2	4	5	5	5	5	9	12	14	14	16	16	18	18	19	10.8	-26.9777

## Sheet: 1st round screening-3
Drug Name	CAS Number	Molecular Number	Concentration (μM)	lifespan of each worm (days)															Mean Lifespan (days)	Lifespan Extension % (of Ctrl)
				1st	2nd	3rd	4th	5th	6th	7th	8th	9th	10th	11th	12th	13th	14th	15th
Control group			0	5	5	12	14	14	14	16	16	17	17	17	18	18	19	19	14.7333
nifekalant hydrochloride	130656-51-8	441.91	100	5	7	9	10	12	14	14	16	16	18	18	18	20	21	21	14.6	-0.882553
atenolol	29122-68-7	266.34	100	5	5	7	12	15	15	16	17	17	17	17	18	18	19	20	14.5333	-1.33514
metoprolol tartrate	56392-17-7	684.81	100	5	5	7	12	13	14	15	15	15	15	15	15	16	19	21	13.4667	-8.5766
quinidine	56-54-2	324.42	100	7	7	12	13	14	15	15	16	16	17	18	18	19	21	21	15.2667	3.64336
propranolol hydrochloride	318-98-9	295.8	100	6	6	7	13	13	14	14	15	16	16	17	17	17	18	21	14	-4.95587
acebutolol hydrochloride	34381-68-5	372.89	100	6	6	6	10	14	15	16	16	16	17	17	17	17	19	20	14.1333	-4.05069
5-(4-methylphenyl)-1H-tetrazole	24994-04-5	463.98	100	9	9	9	10	15	15	17	17	17	17	17	18	19	21	24	15.6	5.90631
esmolol hydrochloride	81161-17-3	331.83	100	9	9	10	10	13	13	13	14	14	14	17	18	18	19	21	14.1333	-4.05069
1-[2-[2-hydroxy-3-(propylamino)propoxy]phenyl]-3-phenylpropan-1-one hydrochloride	34183-22-7	377.9	100	4	4	7	12	12	13	13	14	16	17	17	17	17	17	18	13.2	-10.387
entecavir	142217-69-4	277.28	100	2	8	8	9	10	11	12	12	15	16	16	17	17	17	18	12.5333	-14.9129
ammothamnine	16837-52-8	264.36	100	3	8	10	11	11	13	13	13	13	15	15	17	17	17	18	12.9333	-12.1973
matrine	519-02-8	248.37	100	4	4	4	6	10	10	10	15	17	17	17	17	17	21	21	12.6667	-14.0077
peramivir	229614-55-5	328.41	100	12	13	13	16	17	17	17	17	18	18	18	19	19	21	24	17.2667	17.2211
oseltamivir phosphate	204255-11-8	410.4	100	6	6	8	11	11	12	14	15	16	17	17	20	21	21	21	14.4	-2.24033
trifluridine	70-00-8	296.2	100	4	4	5	6	14	14	15	15	17	17	17	17	17	17	18	13.1333	-10.8396
idoxuridine	54-42-2	354.1	100	6	8	8	9	12	13	14	14	14	15	15	17	17	19	20	13.4	-9.02919
adefovir	106941-25-7	273.19	100	6	11	13	13	13	13	15	15	15	17	17	17	17	17	17	14.4	-2.24033
arbidol hydrochloride	131707-23-8	513.88	100	2	3	3	5	5	9	9	13	14	14	14	14	14	15	15	9.93333	-32.5639
milrinone	78415-72-2	197.19	100	5	7	7	10	13	15	16	16	17	17	17	18	18	18	21	14.3333	-2.69292
amrinone	60719-84-8	187.2	100	8	12	12	15	16	18	18	18	19	19	19	20	21	22	23	17.3333	17.6737
digoxin	20830-75-5	780.94	100	7	7	9	10	10	10	11	11	13	13	16	17	18	21		12.3571	-16.109
adenosine 5'-triphosphate	9000-83-3	507.18	100	7	7	8	8	8	9	12	12	12	13	13	13	20	20	23	12.3333	-16.2706
tolvaptan	150683-30-0	448.94	100	4	6	11	12	14	14	15	16	16	17	17	19	19	20		14.2857	-3.0162
simendan	131741-08-7	280.28	100	13	13	15	16	16	16	17	17	17	17	18	18	18	20	24	17	15.4107
tirofiban hydrochloride monohydrate	150915-40-5	495.07	100	3	6	11	15	15	15	15	17	17	17	18	19	19	21	22	15.3333	4.09595
nicorandil	65141-46-0	211.17	100	2	2	9	10	10	10	15	15	16	17	17	17	17	18	18	12.8667	-12.6499
nifedipine	21829-25-4	346.33	100	10	10	10	10	14	15	15	15	15	15	16	17	18	18		14.1429	-3.98603
bisoprolol fumarate	104344-23-2	441.52	100	8	12	14	17	17	17	17	17	17	17	18	18	18	19	21	16.4667	11.79
puerarin	3681-99-0	432.38	100	7	7	7	11	13	15	18	20	20	20	20	21	21	21	21	16.1333	9.52704
ivabradine hydrochloride	148849-67-6	505.05	100	13	14	14	14	15	15	15	18	20	21	21	22	22	24	24	18.1333	23.1048
amiodarone hydrochloride	19774-82-4	681.78	100	4	4	4	4	6	11	12	12	12	12	13	14	15	16	18	10.4667	-28.9432
isosorbide 5-mononitrate	16051-77-7	191.14	100	2	7	8	10	10	13	14	15	25	15	16	16	18	19	20	13.8667	-5.86105
dronedarone hydrochloride	141625-93-6	593.22	100	4	5	5	6	6	11	12	13	13	13	13	13	13			9.76923	-33.678
molsidomine	25717-80-0	242.23	100	2	4	9	10	10	12	13	13	13	16	16	17	17	18	19	12.6	-14.4603
7-(diethylamino)-5-methyl-S-triazolo[1,5-A]pyrimidine	15421-84-8	205.26	100	5	5	6	11	13	15	15	15	15	15	15	16	17	19	21	13.5333	-8.12401
dilthiazem hydrochloride	33286-22-5	450.98	100	4	4	6	8	8	15	15	15	16	16	16	17	17	18	18	12.8667	-12.6499
ranolazine dihydrochloride	95635-56-6	500.46	100	5	6	7	9	11	15	15	15	15	15	15	17	19	19	22	13.6667	-7.21883
trimetazidine dihydrochloride	13171-25-0	339.26	100	3	6	10	10	11	15	15	16	16	17	17	17	17	21	21	14.1333	-4.05069
vidarabine monophosphate	29984-33-6	347.22	100	4	10	10	10	12	13	14	15	16	17	17	18	18	18	21	14.2	-3.5981
lamivudine	134678-17-4	229.26	100	8	10	10	10	12	12	13	14	14	14	14	15	15	17	17	13	-11.7447
ribavirin	36791-04-5	230.18	100	6	7	7	8	8	8	8	9	9	14	14	17	18	19		10.8571	-26.2923
acyclovir	59277-89-3	225.2	100	9	9	9	9	10	10	11	12	12	13	15	17	17	18	20	12.7333	-13.5551
moroxydine hydrochloride	3160-91-6	207.66	100	9	9	12	13	13	14	15	15	15	15	15	15	17	17	17	14.0667	-4.50328
penciclovir	39809-25-1	253.26	100	3	3	8	8	12	14	14	14	17	17	17	18	18	19	19	13.4	-9.02919
baicalin	21967-41-9	446.36	100	6	7	9	9	10	11	11	14	15	15	17	18	18	18	20	13.2	-10.387
adefovir dipivoxil	142340-99-6	501.47	100	8	9	9	9	9	10	10	10	12	12	12	13	14	15	17	11.2667	-23.5121
imiquimod	99011-02-6	240.3	100	6	6	10	10	10	12	13	14	15	15	18	18	18	18	19	13.4667	-8.5766
famciclovir	104227-87-4	321.33	100	7	8	8	8	10	10	10	10	13	15	17	17	18			11.6154	-21.1447
ganciclovir	82410-32-0	255.23	100	3	6	6	7	8	8	8	11	13	13	14	15	17	17	17	10.8667	-26.2277
3-hydroxytyramine hydrochloride	62-31-7	189.64	100	7	9	14	16	18	19	19	20	21	21	21	21	22	22	23	18.2	23.5574
cinepazide maleate	26328-04-1	532.58	100	6	8	8	9	15	16	17	17	18	18	18	19	20	23	24	15.7333	6.8115
(+/-)-verapamil hydrochloride	152-11-4	491.06	100	12	13	14	15	15	16	16	16	16	16	19	19	20	21	24	16.8	14.053
mildronate	76144-81-5	146.19	100	7	7	8	8	12	14	15	15	16	17	17	17	19	19	19	14	-4.95587
antazoline hydrochloride	2508-72-7	301.81	100	5	8	14	15	17	17	17	17	17	17	17	17	17	18	19	15.4667	5.00113
hydroquinidine	1435-55-8	326.43	100	3	3	3	8	8	8	8	8	12	13	14	15	17	18	19	10.4667	-28.9432
mexiletine hydrochloride	5370-01-4	215.72	100	2	2	3	4	6	6	7	7	8	8	8	8	10	15	17	7.4	-49.7624
digitoxin	71-63-6	764.94	100	4	6	10	12	12	13	14	14	15	16	16	16	16	17	17	13.2	-10.387
procainamide hydrochloride	614-39-1	271.79	100	6	12	12	12	16	16	16	16	17	17	17	17	18	19	19	15.3333	4.09595
disopyramide	3737-09-5	339.47	100	9	10	10	13	14	14	16	16	17	17	19	19	21			15	1.83299
N-acetylprocainamide	32795-44-1	277.36	100	3	4	4	4	4	9	10	10	10	10	10	12	12	14	18	8.93333	-39.3528
methacholine chloride	62-51-1	195.69	100	4	6	7	10	10	12	12	12	12	12	15	17	17	17		11.6429	-20.9582
trazodone hydrochloride	25332-39-2	408.32	100	7	7	10	14	14	15	15	15	17	17	17	17	17	17	21	14.6667	-0.429962
dl-adrenaline hydrochloride	329-63-5	219.67	100	4	4	4	7	7	11	14	14	15	17	17	17	17	17	21	12.4	-15.8181
sotalol hydrochloride	959-24-0	308.82	100	8	9	9	9	9	9	10	10	10	14	15	16	18	18	22	12.4	-15.8181
dihydralazine sulphate	7327-87-9	288.28	100	5	9	9	10	10	10	11	11	11	13	13	17	18			11.3077	-23.2336
olmesartan Medoxomil	144689-63-4	558.59	100	3	4	8	9	9	9	9	9	9	9	9	9	10	13	13	8.8	-40.258
candesartan cilexetil	145040-37-5	610.66	100	2	6	7	8	8	9	11	12	12	12	13	14	16	16	20	11.0667	-24.8699
valsartan	137862-53-4	435.52	100	8	8	10	10	13	14	15	16	17	18	18	20	21			14.4615	-1.82255
clevidipine butyrate	167221-71-8	456.32	100	8	8	10	12	13	13	14	14	15	17	17	17	17	21		14	-4.95587
amlodipine besylate	111470-99-6	581.08	100	2	2	2	3	3	4	4	4	4	7	7	7	7	8	8	4.8	-67.4134
reserpine	50-55-5	608.68	100	2	2	2	3	3	3	3	5	7	7	7	7	7			4.46154	-69.7112
sodium nitroprusside dihydrate	13755-38-9	297.95	100	4	5	9	9	10	12	12	12	12	12	12	12	12			10.2308	-30.5447
losartan potassium	124750-99-8	461	100	4	7	7	7	8	8	8	8	15	15	15	17	17			10.4615	-28.978
guanfacine hydrochloride	29110-48-3	282.55	100	2	5	8	9	10	14	15	16	17	18	20					12.1818	-17.2993
indapamide	26807-65-8	365.83	100	7	9	9	9	9	9	9	10	10	12	12	15	15	15	20	11.3333	-23.0595
urapidil hydrochloride	64887-14-5	423.94	100	3	4	5	6	7	11	13	13	13	14	17	17				10.25	-30.4141
carvedilol	72956-09-3	406.47	100	2	8	8	8	10	10	10	10	10	10	10					8.72727	-40.7517
enalapril maleate	76095-16-4	492.52	100	2	7	8	10	10	11	12	12	13	13	13	14	14	14		10.9286	-25.8074
benazepril hydrochloride	86541-74-4	460.95	100	7	9	10	10	11	12	12	13	17	17	18	18	19			13.3077	-9.65586
telmisartan	144701-48-4	514.63	100	2	7	7	10	10	10	10	12	13	15	15	17	17	17		11.5714	-21.4431

## Sheet: 1st round screening-4
Drug Name	CAS Number	Molecular Number	Concentration (μM)	lifespan of each worm (days)															Mean Lifespan (days)	Lifespan Extension % (of Ctrl)
				1st	2nd	3rd	4th	5th	6th	7th	8th	9th	10th	11th	12th	13th	14th	15th
Control group			0	6	12	13	14	14	14	15	15	16	17	17	17	18	18	19	15
benzhexol hydrochloride	52-49-3	337.93	100	3	3	6	8	9	9	9	10	12	13	14	15	15	16	17	10.6	-29.3333
ropinirole hydrochloride	91374-20-8	296.84	100	5	6	6	6	6	6	6	7	8	9	12	16	16			8.38462	-44.1026
naloxone hydrochloride	357-08-4	363.84	100	10	14	14	16	16	16	17	17	17	17	18	20	20	20		16.5714	10.4762
nefopam hydrochloride	23327-57-3	289.8	100	3	6	6	6	9	12	14	14	15	15	15	16	17	17		11.7857	-21.4286
zolmitriptan	139264-17-8	287.36	100	3	7	12	13	13	14	14	15	15	15	15	15	16	17	17	13.4	-10.6667
sumatriptan succinate	103628-48-4	413.49	100	6	6	9	9	9	10	14	14	15	16	16	17	17	17		12.5	-16.6667
propacetamol hydrochloride	66532-86-3	300.78	100	1	4	10	10	10	11	16	16	16	17	17	17	17	17	20	13.2667	-11.5556
fingolimod hydrochloride	162359-56-0	343.93	100	2	3	3	4	5	14	14	15	15	17	17	17	17	17	17	11.8	-21.3333
bromhexine hydrochloride	611-75-6	412.59	100	6	8	10	12	12	14	14	15	15	15	15	15	15	16	16	13.2	-12
carbocistein	638-23-3	179.19	100	3	10	13	13	13	13	14	14	15	15	15	15	15	15	15	13.2	-12
ambroxol hydrochloride	23828-92-4	414.56	100	4	9	10	12	12	14	14	15	15	15	15	15	15	16	16	13.1333	-12.4444
guaifenesin	93-14-1	198.22	100	4	5	5	5	6	9	13	14	15	15	16	16	16	16	16	11.4	-24
L-cysteine methyl ester hydrochloride	18598-63-5	171..65	100	4	5	7	10	12	13	13	13	14	14	14	14	15	16	17	12.0667	-19.5556
guacetisal	55482-89-8	286.08	100	4	7	9	10	10	11	11	12	13	14	15	15	15	16		11.5714	-22.8571
levodropropizine	99291-25-5	236.31	100	5	8	9	13	14	15	15	16	17	17	17	18	18	20		14.4286	-3.80952
theophylline	58-55-9	180.16	100	4	8	8	8	14	15	15	15	16	16	16	17	17	21	21	14.0667	-6.22222
aminophylline	317-34-0	424.46	100	2	3	6	9	11	15	15	15	16	16	17	17	17	17	20	13.0667	-12.8889
salbutamol	18559-94-9	239.31	100	4	5	9	15	15	15	15	15	16	16	16	16	17	17	17	13.8667	-7.55556
synephrine	94-07-5	167.21	100	13	15	16	16	16	16	17	17	17	17	17	18	19	19	21	16.9333	12.8889
bambuterol hydrochloride	81732-46-9	403.9	100	5	10	13	15	15	15	15	16	16	16	16	17	17	17	20	14.8667	-0.888889
clorprenaline hydrochloride	6933-90-0	250.16	100	10	13	15	15	15	16	17	17	17	17	19	19	21	21		16.5714	10.4762
ketotifen fumarate	34580-14-8	425.5	100	1	10	11	14	15	15	16	16	16	16	17	17	17	17	23	14.7333	-1.77778
tiotropium bromide hydrate	139404-48-1	490.43	100	8	9	9	12	15	15	17	17	17	17	17	18	18	19	22	15.3333	2.22222
montelukast sodium	151767-02-1	608.17	100	5	8	9	13	13	15	15	15	15	15	15	15	16	16		13.2143	-11.9048
isoprenaline hydrochloride	51-30-9	247.72	100	2	14	15	15	16	17	17	17	17	17	17	17	17	17	17	15.4667	3.11111
diprophylline	479-18-5	254.24	100	8	10	10	12	12	13	13	14	15	16	16	16	16	17	20	13.8667	-7.55556
doxofylline	69975-86-6	266.25	100	5	6	6	9	14	14	15	15	16	16	16	16	17	17	17	13.2667	-11.5556
terbutaline sulfate	23031-32-5	548.65	100	4	5	5	5	11	13	13	14	14	15	16	16	17	17	19	12.2667	-18.2222
3,5-bis(acetoxyacetylamino)-4-chlorobenzonitrile	123548-56-1	367.06	100	8	9	12	14	16	16	16	17	17	17	17	17	17	17	18	15.2	1.33333
scopolamine hydrobromide trihydrate	6533-68-2	438.31	100	8	8	9	10	12	12	13	13	14	16	17	17	17	17	19	13.4667	-10.2222
cyclopentalol hydrochloride	50617-63-5	288.08	100	3	5	6	9	10	10	10	12	15	15	16	18	18	22	23	12.8	-14.6667
tulobuterol hydrochloride	56776-01-3	264.19	100	14	14	15	16	17	17	17	18	18	19	19	19	20	20	23	17.7333	18.2222
zileuton	111406-87-2	236.29	100	6	8	13	13	15	15	15	16	16	16	17	17	17	17	19	14.6667	-2.22222
zafirlukast	107753-78-6	575.68	100	9	9	15	15	15	15	17	17	17	17	17	17	17	17	22	15.7333	4.88889
fudosteine	13189-98-5	179.24	100	2	3	4	14	16	17	18	18	18	18	18	19	19	20	22	15.0667	0.444444
tranilast	53902-12-8	327.33	100	5	8	13	16	17	17	17	17	17	17	18	19	19	20	22	16.1333	7.55556
roflumilast	162401-32-3	403.21	100	1	9	9	11	12	13	14	16	16	17	17	18	18	19	19	13.9333	-7.11111
sivelestat sodium	150374-95-1	456.44	100	4	6	9	11	15	15	15	16	16	16	16	16	17	19	19	14	-6.66667
benproperine phosphate	19428-14-9	407.44	100	3	6	7	7	7	9	10	13	15	15	15	16	17	17	18	11.6667	-22.2222
stepronin	72324-18-6	296.32	100	9	12	15	15	15	15	16	16	16	16	17	17	18	18	19	15.6	4
dioxopromethazine hydrochloride	13754-56-8	348.85	100	9	13	14	15	15	15	15	15	16	17	17	17	22	24	16	16	6.66667
dropropizine	17692-31-8	236.31	100	9	15	15	15	16	16	16	16	17	17	18	18	21	16	16	16.0667	7.11111
carbetapentane citrate	23142-01-0	525.59	100	8	9	9	13	15	16	17	17	17	18	20	20	21			15.3846	2.5641
eprazinone dihydrochloride	10402-53-6	453.44	100	11	11	13	15	15	15	16	17	17	18	19	20	21	21	21	16.6667	11.1111
dextromethorphan hydrobromide monohydrate	6700-34-1	370.32	100	9	9	15	15	16	16	17	17	18	19	20					15.5455	3.63636
cloperastine hydrochloride	14984-68-0	366.32	100	12	14	16	16	16	17	17	17								15.625	4.16667
erdosteine	84611-23-4	249.31	100	5	7	8	10	14	16	16	17	17	18	21					13.5455	-9.69697
moguisteine	119637-67-1	339.41	100	10	13	15	15	16	16	16	17	17	17	17	17				15.5	3.33333
chlorpheniramine maleate	113-92-8	390.86	100	4	5	12	15	15	15	15	15	16	16	16	17	17	18		14	-6.66667
fexofenadine hydrochloride	138452-21-8	536.14	100	3	5	6	8	12	15	15	15	15	15	16	16	17	17		12.5	-16.6667
loratadine	79794-75-5	382.88	100	2	8	10	11	11	12	13	14	14	14	14	15				11.5	-23.3333
promethazine hydrochloride	58-33-3	320.88	100	6	10	10	10	12	13	15	16	17	18	18	20				13.75	-8.33333
levocetirizine dihydrochloride	130018-87-0	461.81	100	7	8	9	10	12	14	15	15	17	17	17	19	19	22	23	14.9333	-0.444444
olopatadine hydrochloride	140462-76-6/113806-05-6	373.87	100	10	11	13	15	15	15	16	16	16	16	17	17	18	18	20	15.5333	3.55556
diphenhydramine hydrochloride	147-24-0	291.82	100	6	6	12	13	14	15	16	16	16	17	17	17	17	21		14.5	-3.33333
cyproheptadine hydrochloride sesquihydrate	41354-29-4	323.86	100	5	6	6	7	7	10	10	10	10	13	13	14	15	15		10.0714	-32.8571
dimenhydrinate	523-87-5	469.97	100	4	9	9	13	13	14	14	15	15	15	16	16	17	17	17	13.6	-9.33333
clemastine fumarate	15686-51-8	459.96	100	3	5	9	10	15	16	16	16	16	17	18	19	21			13.9231	-7.17949
buclizine dihydrochloride	129-74-8	505.95	100	9	10	14	15	15	15	16	16	16	16	16	16	18			14.7692	-1.53846
bilastine	202189-78-4	463.61	100	9	15	15	16	17	17	17	17	18	18	18	19	19			16.5385	10.2564
carbinoxamine maleate salt	3505-38-2	406.86	100	11	11	13	15	15	15	16	17	17	18	18	18	19	20		15.9286	6.19048
terfenadine	50679-08-8	471.67	100	6	9	10	10	11	12	13	15	15	16	16	16	18			12.8462	-14.359
meclizine dihydrochloride	1104-22-9	463.87	100	4	9	10	13	13	15	15	16	18							12.5556	-16.2963
pheniramine maleate	132-20-7	356.42	100	5	5	9	15	15	15	15	16	16	16	16	16	19	19	21	14.5333	-3.11111
pemirolast potassium	100299-08-9	266.3	100	5	5	13	13	13	14	15	15	15	16	16	16	16	17	17	13.7333	-8.44444
cromolyn disodium salt	15826-37-6	512.33	100	9	11	14	15	15	15	16	16	17	17	17	19	21	22	16	16	6.66667
clemastine fumarate	14976-57-9	459.96	100	3	5	6	8	10	11	13	17	17	19	19	19	21			12.9231	-13.8462
hydroxydiethylphenamine	13073-96-6	413.386	100	3	10	10	15	15	15	16	16	17	18	18	19	19	19	21	15.4	2.66667
mizolastine	108612-45-9	432.49	100	3	4	6	9	11	11	12	13	14	15	15	15	15	16	17	11.7333	-21.7778
triprolidine hydrochloride	6138-79-0	314.85	100	1	1	7	10	10	11	12	13	14	14	14	17	17	17	20	11.8667	-20.8889
azelastine hydrochloride	79307-93-0	418.36	100	2	8	9	10	11	11	13	14	15	15	16	17				11.75	-21.6667
cetirizine hydrochloride	83881-52-1	425.35	100	12	12	16	17	17	17	17	17	17	17	18	18	19	19	22	17	13.3333
balsalazide	80573-04-2	357.32	100	5	10	10	12	13	15	16	16	17	17	17	17	17	18	18	14.5333	-3.11111
famotidine	76824-35-6	337.45	100	2	2	3	8	10	10	11	11	12	14	16	16	17	17	18	11.1333	-25.7778
roxatidine	78273-80-0	306.4	100	10	10	10	15	15	15	15	16	16	16	16	17	17	19	20	15.1333	0.888889
omeprazole	73590-58-6	345.42	100	2	8	9	10	13	13	14	15	15	15	15	15	15	16	17	12.8	-14.6667
5-aminosalicylic acid	89-57-6	153.14	100	3	3	5	11	12	13	15	15	15	15	16	17				11.6667	-22.2222
ranitidine hydrochloride	71130-06-8/66357-59-3	350.86	100	3	3	9	10	11	16	16	17	17	17	18	18	18	18	23	14.2667	-4.88889
magnesium bis	2090-64-4	146.34	100	3	5	5	9	9	13	14	14	14	15	15	15	16	16		11.6429	-22.381
rabeprazole	117976-89-3	359.44	100	3	7	9	10	10	11	11	11	12	13	13	13	13	14	16	11.0667	-26.2222
esomeprazole	119141-88-7	713.12	100	2	2	2	10	10	11	12	13	13	14	14	14	17			10.3077	-31.2821
lafutidine	118288-08-7	431.55	100	2	3	5	11	13	13	15	15	15	16	19	20	21	21		13.5	-10
pantoprazole	102625-70-7	383.37	100	9	10	11	13	15	15	16	16	17	17	19	21	21			15.3846	2.5641
bismuth potassium citrate	57644-54-9	704.47	100	15	16	17	17	17	18	19	20	23	18	18	18	18	18	18	18	20
lansoprazole	103577-45-3	369.36	100	10	13	14	15	15	15	16	16	16	16	16	17	17			15.0769	0.512821
cimetidine	51481-61-9	252.34	100	6	8	11	11	15	15	16	16	16	16	17	17	17	18	24	14.8667	-0.888889
R-(+)-lansoprazole	13850-94-6	369.36	100	7	8	9	13	14	14	15	16	17	17	17	17	17	17		14.1429	-5.71429
carbenoxolone disodium	7421-40-1	614.72	100	6	10	11	13	15	16	16	16	17	17	17	17	17	19	19	15.0667	0.444444
sucralfate	54182-58-0	2086.74	100	3	11	11	11	12	13	15	16	16	17	17	18	18	19		14.0714	-6.19048
DL-methionine methylsulfonium chloride	3493-12-7	199.7	100	3	8	10	10	10	11	12	12	13	14	15	16	17	17	21	12.6	-16
rebamipide	90098-04-7	370.79	100	6	6	9	11	14	15	15	15	15	15	16	16	16	17		13.2857	-11.4286
amlexanox	68302-57-8	298.29	100	7	8	9	10	11	12	12	14	15	15	15	16	18	18	18	13.2	-12
vonoprazan	881681-00-1	345.39	100	2	5	9	13	13	14	16	17	17	17	17	18	18	19	19	14.2667	-4.88889
nizatidine	76963-41-2	331.46	100	5	5	8	10	12	13	13	15	16	17	17	17	17	17	13	13	-13.3333
troxipide	30751-05-4	294.35	100	6	10	11	12	13	13	13	15	15	15	16	17	18			13.3846	-10.7692
roxatidine acetate hydrochloride	93793-83-0	384.9	100	4	8	9	9	14	14	15	15	15	15	15	16	16	17	17	13.2667	-11.5556
palonosetron hydrochloride	135729-62-3	332.87	100	2	7	10	10	11	11	12	15	15	15	15	15				11.5	-23.3333
olsalazine sodium	6054-98-4	346.2	100	3	9	10	12	13	15	15	15	15	15	16	16	16	17	19	13.7333	-8.44444
sulfasalazine	599-79-1	398.4	100	4	6	8	10	11	14	15	15	15	15	17	17	17	18	20	13.4667	-10.2222
revaprazan hydrochloride	178307-42-1	398.90	100	2	2	3	5	9	9	9	9	10	12	12	13	15	15	15	9.33333	-37.7778
ondansetron hydrochloride	103639-04-9	365.85	100	5	6	9	11	12	14	15	15	15	16	16	16	17	19	19	13.6667	-8.88889
tropisetron hydrochloride	105826-92-4	320.81	100	8	11	12	13	14	15	15	15	16	16	16	16	17			14.1538	-5.64103
methoxychlorprocainamide	364-62-5	299.8	100	5	13	14	15	16	16	16	16	16	17	17	17	17	17	21	15.5333	3.55556
aprepitant	170729-80-3	534.43	100	4	7	8	9	12	14	14	14	14	15	16	16	17			12.3077	-17.9487
fosaprepitant	172673-20-0	614.41	100	5	6	6	6	10	12	13	15	15	15	16					10.8182	-27.8788
ondansetron	99614-02-5	329.82	100	2	13	14	15	15	15	15	15	15	15	16	17	17	17	17	14.5333	-3.11111
1-methylindazole-3-carboxylic acid	107007-99-8	348.87	100	5	9	11	11	11	14	15	15	15	15	16	16	17	20		13.5714	-9.52381
difenidol hydrochloride	3254-89-5	309.45	100	3	5	5	6	8	11	12	13	13	15	17	18	18	20	21	12.3333	-17.7778
nimustine hydrochloride	55661-38-6	309.15	100	9	14	14	16	16	16	16	16	16	16	16	16	17	17	20	15.6667	4.44444
zinc sulphate	7733-02-0	161.45	100	10	12	12	13	13	13	14	15	15	15	15	16	17	17	18	14.3333	-4.44444
dioctyl sulfosuccinate sodium salt	577-11-7	444.56	100	6	9	10	11	13	13	13	14	14	15	15	16	17	17	17	13.3333	-11.1111
loperamide hydrochloride	34552-83-5	513.5	100	2	4	5	7	9	10	10	12	12	14	15	15	15	10	10	10	-33.3333
phenolphthalein	77-09-8	318.32	100	3	6	6	8	9	11	13	15	15	15	15	15	17	17	17	12.1333	-19.1111
bisacodyl	603-50-9	361.39	100	5	6	6	6	7	11	13	13	13	15	15	16	17	18	20	12.0667	-19.5556
racecadotril	81110-73-8	385.48	100	3	6	6	6	6	7	9	14	14	15	16	17	17	17	18	11.4	-24
solifenacin succinate	242478-38-2	480.56	100	9	9	9	10	10	10	10	10	10	10	14	14	16			10.8462	-27.6923
naftopidil dihydrochloride	57149-07-2	392.49	100	14	15	15	15	15	16	17	17	18	19	19	19	19	19	20	17.1333	14.2222
terazosin hydrochloride	63074-08-8	423.89	100	8	14	15	15	16	16	16	16	16	17	17	17	17	17	18	15.6667	4.44444
tamsulosin hydrochloride	106463-17-6	444.97	100	3	3	12	12	14	16	17	17	18	18	18	19	20	20	20	15.1333	0.888889
dapoxetine	119356-77-3	305.38	100	7	7	14	14	14	15	15	15	16	16	17	17	17			14.1538	-5.64103
acetohydroxamic acid	546-88-3	75.07	100	5	12	14	14	14	15	16	16	17	17	17	19	20	21		15.5	3.33333
silodosin	160970-54-7	495.53	100	2	3	15	16	16	16	16	16	17	17	18	18	18	19	21	15.2	1.33333
celecoxib	169590-42-5	381.37	100	3	4	6	7	8	8	11	13	14	15	16					9.54545	-36.3636
acetaminophen	103-90-2	151.16	100	2	3	10	14	16	16	16	17	18	19	19	19	21	23		15.2143	1.42857
ampiroxicam	99464-64-9	447.46	100	15	15	15	16	16	16	17	17	17	18	20	20	21	21	23	17.8	18.6667
methocarbamol	532-03-6	241.24	100	12	14	15	15	15	15	16	16	16	16	16	17	17	18		15.5714	3.80952
sodium risedronate	115436-72-1	305.09	100	6	6	6	6	7	8	8	8	8	8	8	9	9	15		8	-46.6667
ketoprofen	22071-15-4	268.31	100	5	7	11	12	13	15	15	15	15	16	17	17	17	23	23	14.7333	-1.77778
diclofenac sodium	15307-79-6	318.13	100	2	4	14	14	15	15	17	17	18	18	21	14	14	14	14	14.0667	-6.22222
piroxicam	36322-90-4	331.35	100	6	13	13	14	14	15	15	15	16	16	16	16	17	17	20	14.8667	-0.888889
aceclofenac	89796-99-6	354.18	100	3	13	13	13	14	14	14	15	15	15	15	18	19	21	22	14.9333	-0.444444
ibuprofen	15687-27-1	206.28	100	5	7	14	15	15	15	15	15	16	16	16	16	17	18		14.2857	-4.7619
phenacetin	62-44-2	179.22	100	1	3	14	15	15	15	15	16	17	17	17	19	21	22	23	15.3333	2.22222
mefenamic acid	61-68-7	241.29	100	11	15	15	15	15	15	15	15	15	16	17	17	17	20		15.5714	3.80952
4-dimethylamino antipyrine	58-15-1	231.3	100	15	15	16	17	17	18	19	19	20	21	21	22	22	22	23	19.1333	27.5556
nimesulide	51803-78-2	308.31	100	1	10	14	14	15	15	15	15	16	16	16	17	17	17	17	14.3333	-4.44444
D-(-)-salicin	138-52-3	286.28	100	12	14	14	14	15	16	16	16	16	17	17	18	19	21	22	16.4667	9.77778
andrographolide	5508-58-7	350.45	100	10	16	16	16	17	17	17	17	17	17	17	18	18	19	21	16.8667	12.4444
leflunomide	75706-12-6	270.21	100	2	8	12	12	13	14	14	15	15	15	15	16	18	18		13.3571	-10.9524
meloxicam	71125-38-7	351.4	100	10	10	10	14	15	15	17	17	17	17	17	17	18	19	15.2	15.2133	1.42222
metamizole sodium monohydrate	5907-38-0	333.34	100	9	9	12	15	15	15	16	17	17	17	17	18	23			15.3846	2.5641
2-benzoylacetanilide	959-66-0	239.27	100	12	13	14	15	15	18	20	20	20	20	21	24	25			18.2308	21.5385
phenprobamate	673-31-4	179.22	100	4	4	12	12	13	14	14	14	15	15	15	6	17			11.9231	-20.5128
aspirin	50-78-2	399.44	100	3	12	15	15	16	17	19	19	19	20	20	21	21	25		17.2857	15.2381
sodium lauryl sulfoacetate	1847-58-1	330.42	100	3	5	9	15	16	21	26									13.5714	-9.52381
indometacin	53-86-1	357.78	100	3	3	8	9	13	13	14	14	14	14	14	15	15	15	15	11.9333	-20.4444
flufenamic acid	530-78-9	281.23	100	3	11	12	12	13	13	14	14	14	15	16	17	12.83	12.83	12.83	12.8327	-14.4489
hydroxychloroquine sulfate	747-36-4	433.95	100	3	11	12	14	14	15	15	15	15	15	16	16	16	16	17	14	-6.66667
tebipenem pivoxil	161715-24-8	496.64	100	2	2	7	7	8	11	13	13	15	16	17	21	24	12	12	12	-20
strontium ranelate	135459-87-9	513.49	100	3	5	13	14	14	16	17	18	18	18	21	21	21	22		15.7857	5.2381
antipyrine	60-80-0	188.23	100	13	15	15	15	16	17	17	17	17	17	17	18	20	22		16.8571	12.381
fenbufen	36330-85-5	254.28	100	3	3	13	14	15	16	17	17	17	17	18	18	18	21	21	15.2	1.33333
4-biphenylacetic acid	5728-52-9	212.24	100	2	11	12	14	15	17	17	17	17	18	20	20	20	21	22	16.2	8
bufexamac	2438-72-4	223.27	100	1	2	4	12	15	15	16	18	18	18	19	20	20	21	22	14.7333	-1.77778
fenazox	61618-27-7	295.27	100	8	15	15	15	15	17	17	18	18	18	20	21	21	22	22	17.4667	16.4444
carprofen	53716-49-7	273.71	100	7	11	12	15	15	15	16	17	17	18	18	19	19			15.3077	2.05128
sulindac	38194-50-2	356.41	100	3	4	15	15	15	15	15	15	16	17	18	18	19			14.2308	-5.12821
etodolac	41340-25-4	287.35	100	10	10	14	16	16	17	17	17	17	18	18	18	18			15.8462	5.64103
oxaprozin	21256-18-8	293.32	100	1	9	12	14	14	15	16	17	18	18	18	19	19	23		15.2143	1.42857
phenylbutazone	50-33-9	308.37	100	9	9	15	15	16	17	17	17	17	17	18	18	19	20	21	16.3333	8.88889
sasapyrine	552-94-3	258.23	100	2	8	11	11	11	12	13	15	15	15	15	16	16	17	17	12.9333	-13.7778
parecoxib sodium	198470-85-8	392.40	100	9	11	12	12	13	13	14	14	14	15	15	15	16	16	16	13.6667	-8.88889
ketorolac tromethamine	74103-07-4	376.4	100	10	10	12	12	12	13	13	14	15	15	15	16	17	17	17	13.8667	-7.55556
ibuprofen piconol	64622-45-3	297.39	100	3	9	9	10	11	11	12	13	15	15	15	15	16	16	16	12.4	-17.3333
flurbiprofen	5104-49-4	244.26	100	12	12	13	15	16	17	17	18	19	19	21	25	17	17	17	17	13.3333
lornoxicam	70374-39-9	371.82	100	7	11	13	14	15	15	17	17	17	18	18	18	15	15	15	15	0
tofacitinib	477600-75-2	312.37	100	1	3	3	4	12	13	14	14	15	15	15	15	16	16	16	11.4667	-23.5556
benzydamine hydrochloride	132-69-4	345.87	100	2	5	7	9	10	12	14	14	14	15	16	17	17	17		12.0714	-19.5238
cinchophen	132-60-5	249.26	100	2	3	6	10	11	11	11	12	13	13	15	15	16	17	18	11.5333	-23.1111
metaxalone	1665-48-1	221.25	100	3	11	11	15	15	15	15	15	17	17	17	17	17	24		14.9286	-0.47619
sodium tolmetin dihydrate	64490-92-2	315.3	100	3	10	13	14	14	17	17	17	17	17	18	18	18	21		15.2857	1.90476
naproxen	22204-53-1	230.26	100	3	3	3	3	3	3	3	3	3	3	3	3	11	14	14	5	-66.6667
flunixin meglumine	42461-84-7	491.46	100	4	5	11	15	15	15	15	15	15	16	18	18	19	20	21	14.8	-1.33333
benorilate	5003-48-5	313.3	100	4	12	13	15	15	15	15	15	16	17	17	18	20	20		15.1429	0.952381
DL-lysine acetylsalicylate	62952-06-1	326.34	100	10	11	11	12	12	13	13	15	15	16	17	17	17	18	23	14.6667	-2.22222
clopidogrel hydrogen sulfate	135046-48-9	419.9	100	1	1	1	6	11	12	13	15	15	15	9	9	9	9	9	9	-40
4-(aminomethyl)benzoic acid	56-91-7	151.16	100	11	13	15	16	16	16	17	17	17	18	18	19	21	22	23	17.2667	15.1111
tranexamic acid	1197-18-8	157.21	100	6	10	14	15	15	15	15	16	16	16	17	17	18	21	21	15.4667	3.11111
cytidine-5'-triphosphate disodium salt dihydrate	81012-87-5	479.12	100	9	11	12	13	14	15	15	15	16	16	17	17				14.1667	-5.55556

## Sheet: 1st round screening-5
Drug Name	CAS Number	Molecular Number	Concentration (μM)	lifespan of each worm (days)															Mean Lifespan (days)	Lifespan Extension % (of Ctrl)
				1st	2nd	3rd	4th	5th	6th	7th	8th	9th	10th	11th	12th	13th	14th	15th
Control group			0	5	5	12	12	14	15	15	16	16	16	16	17	17	17	17	14
flunarizine dihydrochloride	30484-77-6	477.42	100	1	3	5	6	8	10	11	11	11	15	15	16	17	17	17	10.8667	-22.381
vinpocetine	42971-09-5	350.45	100	4	4	6	8	9	10	12	12	12	13	13	13	14	15	17	10.8	-22.8571
lomerizine hydrochloride	101477-54-7	541.46	100	1	1	1	1	1	2	2	7	9	12	12	12	12	12	12	6.46667	-53.8095
nicergoline	27848-84-6	484.39	100	1	5	6	6	8	9	9	10	12	13	13	14	14	15	17	10.1333	-27.619
betahistine dihydrochloride	5579-84-0	209.12	100	8	9	12	12	13	14	15	15	15	16	16	17	17	17	20	14.4	2.85714
cyclandelate	456-59-7	276.37	100	1	9	13	15	15	15	15	16	17	17	17	18	20	21	21	15.3333	9.52381
tolperisone hydrochloride	3644-61-9	281.82	100	2	10	10	10	12	13	14	16	17	17	17	17	19	19	23	14.4	2.85714
pentoxifylline	6493-05-6	278.31	100	7	10	10	11	12	13	13	14	14	15	15	17	17	18	19	13.6667	-2.38095
tolazoline hydrochloride	59-97-2	196.68	100	2	10	13	13	14	14	15	16	17	17	17	17	18	20	21	14.9333	6.66667
vincamine	1617-90-9	354.44	100	5	5	5	12	12	13	14	14	15	16	17	17	17	19	20	13.4	-4.28571
isoxsuprine hydrochloride	579-56-6	337.84	100	4	4	12	12	14	14	15	15	15	17	17	19	19	20	23	14.6667	4.7619
tolazoline	59-98-3	160.22	100	2	5	6	7	12	12	12	12	12	12	12	12	12	12	12	10.1333	-27.619
phentolamine mesilate	65-28-1	377.46	100	7	13	13	13	14	15	15	15	16	19	21	22	22	26	26	17.1333	22.381
triazolam	28911-01-5	343.21	100	11	11	14	15	15	15	15	16	16	16	16	16	16	17	20	15.2667	9.04762
zopiclone	43200-80-2	388.81	100	5	7	7	10	12	13	13	15	17	17	18	18	19	20	25	14.4	2.85714
gamma-oryzanol	11042-64-1	602.89	100	7	9	13	13	13	14	14	14	14	15	16	16	17	17	18	14	0
chlormezanone	80-77-3	273.74	100	9	9	11	12	12	13	13	16	17	17	17	17	18	21	21	14.8667	6.19048
phenobarbital sodium	57-30-7	254.22	100	5	8	13	13	13	15	15	15	16	17	18	18	18	22	26	15.4667	10.4762
carisoprodol	78-44-4	260.33	100	3	7	12	13	13	15	16	17	17	17	17	17	18	18	24	14.9333	6.66667
mephenoxalone	70-07-5	223.22	100	4	6	10	11	12	13	13	13	13	14	15	15	15	16	20	12.6667	-9.52381
hydroxyzine dihydrochloride	2192-20-3	447.83	100	2	4	5	6	11	12	13	13	13	13	14	15	16	16	18	11.4	-18.5714
ramelteon	196597-26-9	259.34	100	1	6	10	13	13	14	15	15	16	16	16	16	16	16	16	13.2667	-5.2381
gabapentin	60142-96-3	207.7	100	7	11	11	11	12	13	14	14	15	15	15	17	18	19	22	14.2667	1.90476
topiramate	97240-79-4	339.36	100	7	8	12	12	12	14	14	15	15	16	16	16	17	17	17	13.8667	-0.952381
oxcarbazepine	28721-07-5	252.27	100	9	13	13	14	14	14	15	15	15	15	16	16	16	17	18	14.6667	4.7619
phenytoin sodium	630-93-3	274.25	100	6	10	11	12	13	16	16	17	17	19	20	20	20	20	23	16	14.2857
sodium 2-propylpentanoate	1069-66-5	166.19	100	11	13	14	14	15	15	15	15	15	16	16	16	17	17	17	15.0667	7.61905
2,2-DI-N-propylacetamide	2430-27-5	143.23	100	4	12	13	15	15	16	16	16	16	16	16	17	17	17	17	14.8667	6.19048
primidone	125-33-7	218.25	100	5	8	10	12	13	13	15	15	15	15	16	16	17	17	17	13.6	-2.85714
carbamazepine	298-46-4	236.27	100	4	6	9	10	12	13	13	14	14	15	16	16	17	17	18	12.9333	-7.61905
divalproex sodium	76584-70-8	310.4	100	11	12	12	13	14	15	15	15	15	16	16	17	18	18	21	15.2	8.57143
levetiracetam	102767-28-2	170.21	100	9	12	13	15	15	16	16	16	16	17	17	18	18	20	20	15.8667	13.3333
lacosamide	175481-36-4	250.29	100	4	4	8	9	13	13	13	14	14	15	15	15	16	16	17	12.4	-11.4286
zonisamide	68291-97-4	212.23	100	5	6	6	9	9	15	15	15	15	16	16	17	17	17	19	13.1333	-6.19048
riluzole	1744-22-5	234.2	100	5	9	10	10	12	12	12	12	13	13	15	15	15	16	16	12.3333	-11.9048
ethosuximide	77-67-8	141.17	100	13	13	16	16	16	17	17	17	17	17	18	19	20	23	24	17.5333	25.2381
cinromide	58473-74-8	254.12	100	5	6	9	13	14	15	15	15	15	15	16	19	16	16		13.5	-3.57143
lamotrigine	84057-84-1	256.09	100	6	6	9	13	14	14	15	15	15	16	16	17	18	19	20	14.2	1.42857
eslicarbazepine acetate	236395-14-5	296.32	100	7	12	12	13	15	15	16	16	17	17	17	17	18	20	20	15.4667	10.4762
tianeptine	66981-73-5	436.95	100	13	14	15	16	16	16	16	17	17	17	17	17	17	19	21	16.5333	18.0952
duloxetine	136434-34-9	333.38	100	4	4	9	9	9	10	10	12	12	13	13	15	15	15	15	11	-21.4286
olanzapine	132539-06-1	312.43	100	3	3	3	9	10	11	11	12	12	12	13	15	16	17	18	11	-21.4286
doxepin	1229-29-4	317.85	100	4	7	9	11	12	12	14	15	15	16	16	16	16	16	18	13.1333	-6.19048
sertraline	79559-97-0	342.69	100	1	1	1	1	1	2	2	2	2	2	2	2	4	4	4	2.06667	-85.2381
gastrodin	62499-27-8	286.28	100	8	8	11	12	12	13	15	15	16	16	16	17	17	18	23	14.4667	3.33333
clozapine	5786-21-0	326.82	100	2	4	6	9	9	11	12	12	13	13	13	15	17	20		11.1429	-20.4082
chlorpromazine	69-09-0	286.11	100	4	4	4	4	4	4	6	6	6	6	7					5	-64.2857
amisulpride	71675-85-9	326.13	100	5	13	13	13	15	15	15	16	16	16	16	16	16	18		14.5	3.57143
quetiapine fumarate	111974-72-2	355.33	100	6	6	6	6	9	9	12	13	13	13	15	15	16	16	16	11.4	-18.5714
pregabalin	148553-50-8	369.48	100	3	13	13	14	14	14	14	15	15	15	15	16	16	17	17	14.0667	0.47619
atomoxetine	83015-26-3	255.355	100	3	6	6	6	11	12	12	13	13	13	15	17	17	24		12	-14.2857
paroxetine hydrochloride	78246-49-8	159.23	100	2	2	2	3	3	4	6	6	7	7	12	12	13	14	14	7.13333	-49.0476
citalopram	59729-33-8	255.35	100	2	5	11	11	11	12	14	14	14	14	15	16	17	18	20	12.9333	-7.61905
paroxetine-d4 hydrochloride	110429-35-1	324.39	100	9	9	9	9	12	12	12	14	14	15	16	16	17	17	17	13.2	-5.71429
moclobemide	71320-77-9	369.85	100	3	15	15	15	15	16	16	16	16	16	16	16	17			14.7692	5.49451
mirtazapine	85650-52-8	268.74	100	9	11	11	13	15	15	15	15	15	15	16	16	17	17		14.2857	2.04082
risperidone	106266-06-2	265.35	100	4	12	13	15	15	15	16	16	16	16	17	17	17	17	17	14.8667	6.19048
trifluoperazine dihydrochloride	440-17-5	480.42	100	3	4	5	5	6	6	6	6	7	7	10	10	10	10		6.78571	-51.5306
blonanserin	132810-10-7	367.5	100	4	5	12	13	16	16	16	17	18	18	18	20	20	20	20	15.5333	10.9524
agomelatine	138112-76-2	243.3	100	7	10	14	14	15	15	15	15	16	16	16	17	17	18	19	14.9333	6.66667
lurasidone hydrochloride	367514-88-3	492.68	100	6	8	13	13	14	15	15	15	15	15	17	17	18	18	20	14.6	4.28571
fluoxetine hydrochloride	56296-78-7	345.79	100	2	4	4	5	7	8	8	9	9	10	12	12	15	16	17	9.2	-34.2857
vilazodone hydrochloride	163521-12-8	477.99	100	14	14	15	15	15	15	15	15	15	16	16	16	17	19	20	15.8	12.8571
desvenlafaxine succinate	386750-22-7	399.48	100	2	4	4	4	12	12	12	13	14	15	16	17	17	18	19	11.9333	-14.7619
perphenazine	58-39-9	373.94	100	2	4	8	9	10	11	11	12	12	14	16	16	16	17	18	11.7333	-16.1905
fluvoxamine maleate	61718-82-9	434.41	100	2	6	6	6	6	11	11	11	12	12	12	13	15	15		9.85714	-29.5918
penfluridol	26864-56-2	523.97	100	2	2	2	2	3	3	3	3	3	4	4	5				3	-78.5714
amoxapine	14028-44-5	285.77	100	2	8	10	11	11	12	13	14	15	15	15	16	16	17	19	12.9333	-7.61905
2-propenamide	33464-86-7	340.16	100	2	3	5	8	11	11	13	15	16	16	16	17	17	17	20	12.4667	-10.9524
melitracen hydrochloride	10563-70-9	327.89	100	6	6	8	10	10	10	10	12	13	13	13	14	15	15	14	11.2667	-19.5238
equilin	474-86-2	268.35	100	8	9	13	13	13	15	15	15	15	15	16	16	16	17	17	14.2	1.42857
clorgyline hydrochloride	17780-75-5	308.63	100	2	2	2	2	3	3	3	4	4	4	4	5	5	5	6	3.6	-74.2857
pirenzepine hydrochloride	29868-97-1	424.32	100	6	10	10	12	12	13	14	15	15	16	16	16	16	17	18	13.7333	-1.90476
imipramine hydrochloride	113-52-0	316.87	100	4	4	13	13	13	13	13	13	15	15	18	18	19	20		13.6429	-2.55102
trimipramine maleate salt	521-78-8	410.51	100	2	2	10	10	13	13	14	15	15	15	16	16	18	19	20	13.2	-5.71429
haloperidol	52-86-8	375.86	100	6	6	7	8	8	10	13	15	16	16	16	17	19	22		12.7857	-8.67347
maprotiline hydrochloride	10347-81-6	313.86	100	2	2	2	2	7	7	7	7	10	14	14	15	16	20		8.92857	-36.2245
amitriptyline hydrochloride	549-18-8	313.86	100	5	7	9	11	11	11	14	14	15	15	19					11.9091	-14.9351
thioridazine hydrochloride	130-61-0	407.04	100	7	7	8	8	9	11	11	15	16	17	18					11.5455	-17.5325
sodium prasterone sulfate	1099-87-2	390.47	100	6	13	13	14	14	15	15	15	16	16	16	16	17	26		15.1429	8.16327
ziprasidone hydrochloride	138982-67-9	467.42	100	6	9	10	11	11	11	13	13	13	13	13	15	10	10	10	11.2	-20
clomipramine hydrochloride	17321-77-6	351.31	100	2	2	5	6	8	8	9	9	9	10	10	10	12	15	16	8.73333	-37.619
levosulpiride	23672-07-3	341.43	100	7	10	10	10	10	14	14	15	15	15	15	17	17	17	18	13.6	-2.85714
aripiprazole	129722-12-9	448.39	100	4	8	8	8	11	11	12	13	13	15	15	15	16	16		11.7857	-15.8163
chlorprothixene	113-59-7	315.86	100	2	6	9	9	10	11	13	13	13	14	15	15	17	17		11.7143	-16.3265
tiapride hydrochloride	51012-33-0	364.89	100	6	7	10	8	12	13	13	14	15	16	16	17	17	17	20	13.4	-4.28571
perospirone hydrochloride	129273-38-7	463.04	100	6	9	10	10	11	14	14	15	16	16	16	17	17	17	17	13.6667	-2.38095
bupropion hydrochloride	31677-93-7	276.2	100	5	10	10	13	14	14	14	14	14	15	16	16	17	17	17	13.7333	-1.90476
paliperidone	144598-75-4	426.48	100	6	14	14	14	14	15	15	15	15	15	16	16	16	16	16	14.4667	3.33333
brexpiprazole	913611-97-9	433.57	100	6	10	10	10	12	12	15	15	15	15	15	16	16			12.8462	-8.24176
vortioxetine	508233-74-7	298.45	100	2	2	3	5	8	8	8	9	11	11	12	12	12	16	13	8.8	-37.1429
pentazocine	359-83-1	285.42	100	12	13	13	13	15	15	15	15	15	16	16	21	19	17		15.3571	9.69388
tetrahydropalmatine hydrochloride	6024-85-7	355.43	100	6	8	8	13	13	15	15	15	15	15	15	16	16	16	16	13.4667	-3.80952
lappaconitine hydrobromide	97792-45-5	665.61	100	4	12	14	15	15	15	15	15	15	16	17	17	17	17	17	14.7333	5.2381
alpha-lobeline hydrochloride	134-63-4	373.92	100	6	6	6	12	12	13	13	13	15	15	15	116	17	17	17	19.5333	39.5238
flumazenil	78755-81-4	303.29	100	2	4	6	13	13	13	13	14	15	15	15	15	16	16	17	12.4667	-10.9524
sodium camphorsulphonate	34850-66-3	254.28	100	2	6	8	10	11	11	13	15	15	16	16	16	16	17	18	12.6667	-9.52381
meclofenoxate hydrochloride	3685-84-5	294.17	100	10	11	12	13	13	14	15	15	16	16	16	17	18	20		14.7143	5.10204
3-ethyl-3-methylglutarimide	64-65-3	155.19	100	5	6	7	11	12	15	15	15	15	16	16	16	16	17	17	13.2667	-5.2381
venlafaxine	93413-69-5	277.4	100	11	11	12	13	14	15	15	15	16	16	16	16				14.1667	1.19048
N-acetylglycinamide	2620-63-5	116.12	100	3	4	10	11	13	13	14	15	15	15	15	16	16	16	17	12.8667	-8.09524
aniracetam	72432-10-1	219.24	100	3	3	8	10	10	10	10	10	12	13	13	15	15	15	16	10.8667	-22.381
caffeine	58-08-2	194.19	100	5	8	11	11	13	13	13	13	15	15	15	16	16	16	17	13.1333	-6.19048
memantine hydrochloride	41100-52-1	215.76	100	3	6	8	10	10	11	12	13	14	15	15	15	15	16		11.6429	-16.8367
piracetam	7491-74-9	142.16	100	6	12	13	14	15	15	15	15	16	16	16	17	17	17		14.5714	4.08163
donepezil hydrochloride	120011-70-3	415.95	100	2	8	8	10	12	13	13	15	15	15	16	17	17	18	19	13.2	-5.71429
(-)-huperzine A	102518-79-6	242.32	100	4	4	4	5	13	13	15	15	15	15	15	15	15	15	16	11.9333	-14.7619
choline glycerophosphate	28319-77-9	257.22	100	2	6	12	13	13	14	15	15	15	15	15	16	16	16	16	13.2667	-5.2381
rivastigmine tartrate	129101-54-8	400.42	100	3	7	9	9	10	12	13	15	16	16	17	17	17	17	17	13	-7.14286
tacrine hydrochloride	1684-40-8	234.72	100	2	3	11	11	13	13	14	15	15	15	15	15	16	16	16	12.6667	-9.52381
pramipexole	104632-26-0	211.33	100	3	6	6	11	11	11	13	15	15	15	15	16	16	16	17	12.4	-11.4286
benserazide	322-35-0	257.24	100	7	10	13	13	13	14	14	15	16	16	16	17	17	17	18	14.4	2.85714
dopa	116004-31-0	744.93	100	2	11	11	13	14	14	15	15	16	16	16	16	18	18	20	14.3333	2.38095
baclofen	1134-47-0	213.66	100	13	13	14	14	15	15	15	16	17	17	17	17	17	18	18	15.7333	12.381
S-(-)-carbidopa	28860-95-9	226.23	100	4	7	11	12	12	14	15	15	15	15	16	16	16	18	18	13.6	-2.85714
piribedil	3605-01-4	298.34	100	2	9	10	11	12	13	13	13	13	13	13	15	15	15	16	12.2	-12.8571
trimebutine maleate	34140-59-5	503.54	100	10	11	11	12	14	16	16	16	16	16	17	18	20	20	20	15.5333	10.9524
prucalopride succinate	179474-85-2	485.96	100	12	13	14	15	15	15	16	16	16	17	17	19	19	20	20	16.2667	16.1905
domperidone	57808-66-9	425.92	100	1	1	5	10	12	13	15	15	15	16	16	16	17	19	22	12.8667	-8.09524
aluminum hydroxide	21645-51-2	78	100	10	13	14	16	17	17	19	19	19	19	20	21	21	22	22	17.9333	28.0952
orlistat	96829-58-2	495.73	100	5	7	14	16	16	16	16	16	16	16	17	19	19	19	20	15.4667	10.4762
histamine phosphate	51-74-1	307.14	100	2	11	11	11	12	16	17	17	17	17	19	19	20	22	22	15.5333	10.9524
acotiamide hydrochloride trihydrate	773092-05-0	487.013	100	9	12	14	14	14	15	15	15	15	16	16	16	17	19	21	15.2	8.57143
tegaserod maleate	189188-57-6	417.46	100	1	2	3	7	5	5	5	5	5	11	11	11	11	11	23	7.73333	-44.7619
lorcaserin hydrochloride	846589-98-8	231.06	100	1	3	6	6	7	7	7	8	8	8	9	10	10	12	12	7.6	-45.7143
cetilistat	282526-98-1	401.58	100	3	10	10	11	11	11	12	15	16	17	17	19	19	20	22	14.2	1.42857
adiphenine hydrochloride	50-42-0	347.88	100	12	13	13	14	15	16	16	16	16	16	19	19	20	21	24	16.6667	19.0476
methscopolamine bromide	155-41-9	398.29	100	8	10	14	16	16	17	17	17	17	17	19	19	21	21	22	16.7333	19.5238
itopride hydrochloride	122892-31-3	394.89	100	1	3	10	11	13	13	14	16	16	16	16	16	17	17	18	13.1333	-6.19048
propantheline bromide	50-34-0	448.39	100	9	10	12	12	15	15	16	16	17	17	19	19	19	19	19	15.6	11.4286
choline bitartrate	87-67-2	295.33	100	3	11	12	15	15	16	17	17	17	19	19	19	20	20	22	16.1333	15.2381
glycyrrhizic acid	1405-86-3	822.93	100	3	5	13	15	15	15	15	16	16	16	17	17	19	23	25	15.3333	9.52381
diammonium glycyrrhizinate	79165-06-3	857	100	1	1	9	10	12	14	16	16	17	19	19	19	19	20	20	14.1333	0.952381
cucurbitacin B	6199-67-3	558.7	100	2	2	2	9	9	12	13	13	15	16	16	16	17	19	20	12.0667	-13.8095
D-glucurono-3,6-lactone	32499-92-6	176.12	100	4	7	10	11	12	13	13	14	15	16	17	19	20	22	24	14.4667	3.33333
choline chloride	67-48-1	139.62	100	1	12	12	12	12	15	15	16	16	16	19	19	22	22	22	15.4	10
creatinine	60-27-5	113.12	100	5	12	14	14	15	15	15	16	16	17	17	17	17	19	22	15.4	10
silibinin	22888-70-6	482.44	100	3	7	8	10	10	13	15	15	15	16	16	16	17	19	21	13.4	-4.28571
orazamide	2574-78-9	282.21	100	4	11	15	15	15	17	17	17	19	20	20	20	21	22	22	17	21.4286
sodium oleate	143-19-1	304.44	100	10	13	15	15	15	15	16	16	17	17	17	17	17	17	21	15.8667	13.3333
sodium cholate	361-09-1	430.55	100	1	3	3	6	12	14	14	16	16	16	16	16	16	19	19	12.4667	-10.9524
ursodeoxycholic acid	128-13-2	392.57	100	1	3	3	3	4	5	6	6	6	7	10	16	18	18	22	8.53333	-39.0476
3-phenyl-1-propanol	122-97-4	136.19	100	3	4	7	11	13	13	13	15	16	16	16	16	16	18	19	13.0667	-6.66667
chenodeoxycholic acid	474-25-9	392.57	100	6	9	9	9	11	11	16	17	17	18	18	20	20	21	27	15.2667	9.04762
4-methylumbelliferone	90-33-5	176.17	100	5	6	7	7	13	13	16	16	17	18	18	19	19	19	20	14.2	1.42857
dehydrocholic acid	81-23-2	402.52	100	9	9	13	13	15	15	16	16	16	16	16	16	17	17	18	14.8	5.71429
azintamide	1830-32-6	259.76	100	2	3	3	6	9	10	10	10	13	15	16	16	17	20	22	11.4667	-18.0952
3-pyridinecarboxylic acid N-hydroxymethylamide	3569-99-1	152.15	100	3	6	9	9	10	12	15	15	15	16	17	17	18	18	22	13.4667	-3.80952
trepibutone	41826-92-0	310.34	100	2	2	4	7	12	12	13	13	13	14	15	16	17	17	21	11.8667	-15.2381
2-hydroxy-N-(4-hydroxyphenyl)-benzamide	526-18-1	229.23	100	5	8	8	9	10	11	12	13	13	15	15	15	15	16	16	12.0667	-13.8095
sodium taurocholate	145-42-6	537.68	100	3	8	9	14	14	15	15	16	18	18	18	19	19	20	21	15.1333	8.09524
glycocholic acid sodium salt	863-57-0	487.60	100	5	8	10	11	11	15	15	16	16	16	17	18	18	18	20	14.2667	1.90476
triamterene	396-01-0	253.26	100	3	5	7	7	7	8	8	8	8	9	12	13	15	15	16	9.4	-32.8571
hydrochlorothiazide	58-93-5	297.74	100	1	1	7	9	9	13	13	14	15	15	15	16	17	17	17	11.9333	-14.7619
spironolactone	52-01-7	416.57	100	5	6	7	9	10	11	12	12	14	14	15	15	15	16	20	12.0667	-13.8095
furosemide	54-31-9	330.74	100	6	9	11	13	15	15	15	15	15	16	16	16	16	17	18	14.2	1.42857
torasemide	56211-40-6	348.42	100	3	12	12	13	14	15	16	16	16	16	16	16	17	17	20	14.6	4.28571
chlorothiazide	58-94-6	295.72	100	3	8	9	10	11	11	11	14	14	14	15	16	16	16	18	12.4	-11.4286
chlortalidone	77-36-1	338.77	100	8	8	9	10	12	14	15	15	15	16	16	17	17	18	19	13.9333	-0.47619
phenazopyridine hydrochloride	136-40-3	249.7	100	3	9	10	10	10	10	10	10	10	10	10	10	11	13	15	10.0667	-28.0952
D-mannitol	69-65-8	182.17	100	8	10	10	10	10	11	11	11	13	15	15	17	19	20	20	13.3333	-4.7619
amiloride hydrochloride dihydrate	17440-83-4	302.12	100	6	9	11	12	12	12	12	12	13	14	14	16	16	18	19	13.0667	-6.66667
bumetanide	28395-03-1	364.42	100	3	9	9	10	11	11	12	13	15	15	15	15	15	16	17	12.4	-11.4286
tolterodine tartrate	124937-52-6	475.57	100	5	9	11	11	16	16	16	16	17	17	17	17	19	20	20	15.1333	8.09524
imidafenacin	170105-16-5	319.4	100	4	6	7	11	11	12	13	13	16	16	17	19	19	20	20	13.6	-2.85714
oxybutynin	5633-20-5	357.49	100	2	4	4	4	11	13	13	16	16	17	17	17	17	17	17	12.3333	-11.9048
trospium chloride	10405-02-4	427.96	100	5	5	5	6	12	13	13	15	15	15	16	16	17	17	19	12.6	-10
mirabegron	223673-61-8	396.51	100	8	10	10	13	13	13	14	15	15	15	15	16	18	18	19	14.1333	0.952381

## Sheet: 1st round screening-6
				lifespan of each worm (days)
Drug Name	CAS Number	Molecular Number	Concentration (μM)	1st	2nd	3rd	4th	5th	6th	7th	8th	9th	10th	11th	12th	13th	14th	15th	Mean Lifespan (days)	Lifespan Extension % (of Ctrl)
Control group			0	1	7	8	12	13	14	15	16	17	17	17	18	18	19	26	14.5333
emtricitabine	143491-57-0	247.25	100	2	4	10	14	15	15	15	16	16	16	17	18	18	18	21	14.3333	-1.35352
valacyclovir hydrochloride	124832-27-5	360.8	100	9	9	15	15	15	16	16	16	16	16	19	19	19	20	21	16.0667	10.5758
lopinavir	192725-17-0	628.8	100	6	10	10	10	10	10	10	10	10	10	10	10	10	10	10	9.73333	-33.0122
abacavir	136470-78-5	286.33	100	4	10	10	10	10	10	10	10	10	10	10	10	10	10	10	9.6	-33.9298
brivudine	69304-47-8	333.14	100	4	6	9	10	10	10	10	10	10	10	10	10	10	10	10	9.26667	-36.2239
sofosbuvir	1190307-88-0	529.45	100	3	12	13	15	16	16	17	17	18	18	18	19	20	20	21	16.2	11.4935
2'-deoxy-L-thymidine	3424-98-4	242.23	100	3	10	10	10	10	10	10	10	10	10	10	10	10	10	10	9.53333	-34.3886
efavirenz	154598-52-4	315.67	100	4	4	4	4	5	5	6	6	6	6	6	6	7	7	7	5.53333	-61.9179
ritonavir	155213-67-5	720.96	100	14	15	15	15	16	16	16	16	17	18	18	18	20	22	23	17.2667	18.8346
stavudine	3056-17-5	224.21	100	5	11	11	15	16	17	17	18	18	18	18	18	19	19	21	16.0667	10.5758
netobimin	88255-01-0	420.46	100	13	15	16	16	17	17	17	18	18	18	18	19	20	21	22	17.6667	21.5875
zidovudine	30516-87-1	283.24	100	3	7	12	15	17	18	19	19	20	21	21	21	22	24	24	17.5333	20.6699
tenofovir disoproxil	201341-05-1	519.44	100	17	17	18	18	19	19	19	19	21	21	21	22	23	25	25	20.2667	39.4815
raltegravir potassium	871038-72-1	482.51	100	10	10	10	11	12	15	17	17	17	17	17	18	18	19	22	15.3333	5.52879
nevirapine	129618-40-2	266.3	100	8	8	12	14	14	14	15	15	15	16	17	18	19	19	21	15	3.23469
dideoxyinosine	69655-05-6	236.23	100	2	3	11	17	17	18	18	18	18	19	19	19	19	19	20	15.8	8.74054
atovaquone	95233-18-4	366.84	100	3	3	3	3	6	5	9	11	11	11	19	21	21	23	24	11.5333	-20.624
zalcitabine	7481-89-2	211.22	100	2	2	4	5	10	11	13	13	16	16	16	17	18	19	20	12.1333	-16.4946
tenofovir alafenamide	379270-37-8	476.46	100	7	10	10	11	11	11	11	11	11	11	11	11	11	11	11	10.6	-27.0475
ethambutol dihydrochloride	1070-11-7	277.23	100	2	12	16	17	17	17	18	19	21	21	21	23	24	24	24	18.4	26.6345
rifampicin	13292-46-1	822.94	100	2	2	5	6	6	6	9	9	10	10	10	10	10	10	10	7.66667	-47.2356
streptomycin sulfate	3810-74-0	1457.38	100	2	2	11	11	11	11	11	11	14	15	16	16	18	21	25	13	-10.5299
sodium 4-aminosalicylate dihydrate	6018-19-5	211.15	100	2	10	16	17	18	18	18	18	18	18	22	22	23	24	25	17.9333	23.4228
4,4'-diaminodiphenylsulfone	80-08-0	248.3	100	9	9	9	10	10	10	11	15	18	18	21	22	22	22	25	15.4	5.98761
protionamide	14222-60-7	180.27	100	8	8	9	10	10	11	11	11	11	11	11	11	11	11	11	10.3333	-28.8828
clofazimine	2030-63-9	473.4	100	9	9	9	9	9	9	10	10	10	10	10	10	10	10	10	9.6	-33.9298
cyanoacetohydrazide	140-87-4	99.09	100	3	3	9	10	10	10	10	10	10	10	10	10	10	10	10	9	-38.0592
ethionamide	536-33-4	166.24	100	2	3	10	10	10	10	10	10	10	10	10	10	10	10	10	9	-38.0592
capastat sulfate	1405-37-4	752.76	100	9	10	10	12	18	19	19	19	20	20	21	21	22	23	23	17.7333	22.0463
thalidomide	50-35-1	258.23	100	8	10	10	10	10	10	15	16	19	19	19	20	23	23	25	15.8	8.74054

## Sheet: 1st round screening-7
Drug Name	CAS Number	Molecular Number	Concentration (μM)	lifespan of each worm (days)															Mean Lifespan (days)	Lifespan Extension % (of Ctrl)
				1st	2nd	3rd	4th	5th	6th	7th	8th	9th	10th	11th	12th	13th	14th	15th
Control group			0	5	6	8	9	11	12	14	16	16	17	17	19	21	22	23	13.6552
				5	6	8	8	10	11	12	14	15	16	17	17	19	22
methotrexate	59-05-2	454.44	100	6	6	8	9	10	13	13	13	13	14	16	17	18	19		12.5	-8.49195
5-fluorouracil	51-21-8	130.08	100	7	9	10	10	10	11	11	13	13	16	16	16	17	17	19	13	-4.83163
gemcitabine hydrochloride	122111-03-9	299.66	100	5	9	10	10	10	10	10	10	10	10	10	10	10	10	10	9.6	-29.7218
busulfan	55-98-1	246.3	100	3	5	7	10	10	10	10	10	10	12	13	16	18	18	18	11.3333	-17.0327
6-thioguanine	154-42-7	167.19	100	5	8	10	10	10	10	10	13	20	20	21	21	21	21	21	14.7333	7.85749
clofarabine	123318-82-1	303.68	100	4	5	5	10	10	10	10	10	12	13	13	15	15	16	20	11.2	-18.0088
5-azacytidine	320-67-2	244.2	100	6	6	6	7	7	10	10	10	10	10	12	13	15	15	16	10.2	-25.3294
fludarabine phosphate	75607-67-9	365.21	100	1	5	5	5	6	7	7	7	8	10	10	10	10	10	10	7.4	-45.8272
hydroxyurea	127-07-1	76.05	100	6	6	6	7	7	10	10	11	12	13	13	13	16	17	17	10.9333	-19.961
miltefosine	58066-85-6	407.57	100	5	6	6	7	7	7	10	10	10	10	13	13	15	16	16	10.0667	-26.3055
6-mercaptopurine	50-44-2	152.18	100	10	10	10	10	10	10	10	10	10	10	10	10	10	10	10	10	-26.7936
temozolomide	85622-93-1	194.15	100	2	4	5	6	7	9	10	12	15	15	15	16	21			10.5385	-22.8517
doxifluridine	3094-09-5	246.19	100	1	2	3	5	6	7	8	8	8	10	10	15	16	17	21	9.13333	-33.1381
carmofur	61422-45-5	257.26	100	4	5	5	5	6	9	9	9	9	9	10	10	10	10	21	8.73333	-36.0664
fludarabine	21679-14-1	285.23	100	3	4	4	6	7	7	7	7	7	7	7	8	8	8	8	6.53333	-52.1718
dacarbazine	4342-03-4	182.18	100	3	4	5	5	5	5	5	6	9	10	10	13	13	15	18	8.4	-38.5066
tamibarotene	94497-51-5	351.44	100	1	4	4	4	4	5	6	9	9	10	10	10	10	10	10	7.06667	-48.2674
imatinib mesylate	220127-57-1	589.71	100	4	4	5	9	9	9	10	10	10	10	17	18	18	18	20	11.4	-16.5447
gimeracil	103766-25-2	145.54	100	3	4	4	4	5	5	5	9	10	15	17	18	18	20	22	10.6	-22.4012
tegafur	17902-23-7	200.17	100	3	5	6	10	12	16	17	17	18	19	19	19	20	21	21	14.8667	8.83358
tamoxifen citrate	54965-24-1	563.64	100	1	1	1	3	3	4	5	5	8	10	10	10	10	13	13	6.46667	-52.6598
letrozole	112809-51-5	285.3	100	5	5	6	10	10	16	17	17	17	17	18	19	20	21	21	14.6	6.88141
vorinostat	149647-78-9	264.32	100	2	4	4	4	4	6	6	8	10	10	10	10	10	10	10	7.2	-47.2914
cisplatin	15663-27-1	298.96	100	5	6	6	7	8	9	9	10	10	10	10	14	14	19	19	10.4	-23.8653

## Sheet: 1st round screening-8
Drug Name	CAS Number	Molecular Number	Concentration (μM)	lifespan of each worm (days)															Mean Lifespan (days)	Lifespan Extension % (of Ctrl)
				1st	2nd	3rd	4th	5th	6th	7th	8th	9th	10th	11th	12th	13th	14th	15th
Control group			0	1	6	11	12	13	15	15	16	16	16	16	16	18	18	24
				4	9	11	12	13	14	14	16	17	17	17	17	19	22	23	14.6
propyphenazone	479-92-5	230.31	100	10	11	12	12	13	13	16	16	13	17	17	17	17	17	17	14.5333	-0.456621
nabumetone	42924-53-8	228.29	100	2	2	10	10	10	11	11	11	12	13	14	14	15			10.3846	-28.8725
pranoprofen	52549-17-4	255.27	100	3	5	5	6	11	11	12	12	13	13	17	17	17	17	17	11.7333	-19.6347
loxoprofen sodium	80382-23-6	268.28	100	2	2	2	3	3	14	14	15	15	15	16	17	17	21		11.1429	-23.6791
tenoxicam	59804-37-4	337.37	100	3	6	11	11	11	11	11	11	11	11	12	13	14	15	16	11.1333	-23.7443
tolfenamic acid	13710-19-5	261.7	100	4	4	4	5	6	6	6	6	8	9	9	9	10	10	10	7.06667	-51.5982
zaltoprofen	74711-43-6/89482-00-8	298.36	100	2	3	6	10	10	11	12	12	12	12	12	12	13	14	19	10.6667	-26.9406
fenoprofen calcium salt, dihydrate	71720-56-4	260.285	100	3	9	9	11	11	12	14	14	15	15	15	16	16	17	19	13.0667	-10.5023
diclofenac epolamine	119623-66-4	410.34	100	4	6	10	12	12	12	12	13	15	16	17	17	17	18	18	13.2667	-9.13242
etoricoxib	202409-33-4	358.84	100	7	10	10	10	10	10	12	12	12	12	12	13	14	17	15	11.7333	-19.6347
febuxostat	144060-53-7	316.37	100	3	7	10	10	10	10	10	10	10	11	11	11	12	12	17	10.2667	-29.6804
probenecid	57-66-9	285.36	100	3	3	3	10	10	11	12	12	12	12	13	14	15	15	17	10.8	-26.0274
allopurinol	315-30-0	136.11	100	4	4	8	12	12	12	12	15	15	17	17	17	20	21		13.2857	-9.00196
colchicine	64-86-8	399.44	100	10	12	12	13	14	14	14	15	15	15	15	15	17	17	19	14.4667	-0.913242
topiroxostat	577778-58-6	248.24	100	5	5	6	7	10	10	11	12	12	12	14	14	14	15	17	10.9333	-25.1142
benzbromarone	3562-84-3	424.08	100	4	9	10	10	10	10	10	10	10	17	11	11	11	14	16	10.8667	-25.5708
rizatriptan benzoate	145202-66-0	391.47	100	12	12	12	14	17	17	17	17	17	17	17	17	17	19	20	16.1333	10.5023
rdea 594	878672-00-5	404.28	100	9	9	10	13	13	16	17	17	17	17	17	19	21	22	24	16.0667	10.0457
phloroglucinol	108-73-6	126.11	100	4	4	4	4	5	6	9	11	12	12	12	14	14	16	17	9.6	-34.2466
chlorzoxazone	95-25-0	169.57	100	2	3	4	4	4	12	12	12	12	12	12	12	13	13		9.07143	-37.8669
cyclobenzaprine hydrochloride	6202-23-9	311.85	100	2	3	3	4	4	4	4	4	5	5	12	12	13	17	21	7.53333	-48.4018
eperisone hydrochloride	56839-43-1	295.85	100	6	9	11	12	12	12	13	13	15	15	15	15	16	18		13	-10.9589
alverine citrate	5560-59-8	473.56	100	5	7	9	11	11	11	13	13	13	14	14	15	16	17		12.0714	-17.319
flavoxate hydrochloride	3717-88-2	427.92	100	2	7	9	10	11	11	11	12	12	13	14	15	16	16	17	11.7333	-19.6347
salicylamide	65-45-2	137.14	100	4	4	10	10	10	11	12	12	12	13	13	13	16	17	17	11.6	-20.5479
carbasalate calcium	5749-67-7	458.43	100	4	7	7	7	7	9	11	12	12	12	12	13	14	16	17	10.6667	-26.9406
2-ethoxybenzamide	938-73-8	165.19	100	2	7	7	7	9	9	13	13	14	14	15	16	17	17	20	12	-17.8082
metronidazole	443-48-1	171.15	100	10	12	14	14	15	16	17	17	17	17	21	21				15.9167	9.01826
diminazene	536-71-0	281.32	100	4	5	7	7	9	10	10	10	10	10	11	11	11	11	12	9.2	-36.9863
cinchonidine	485-71-2	294.39	100	5	5	5	7	8	8	8	8	11	13	13	14	15	19	20	10.6	-27.3973
cinchonine	118-10-5	294.39	100	4	5	9	9	12	14	14	14	14	15	15	16	16	16	16	12.6	-13.6986
quinine dihydrochloride	60-93-5	397.34	100	7	7	11	12	14	14	15	15	16	16	16	20	22	22	22	15.2667	4.56621
albendazole	54965-21-8	265.33	100	2	2	6	6	8	12	13	15	15	15	15	15	17	17	17	11.6667	-20.0913
praziquantel	55268-74-1	312.41	100	3	3	3	13	13	13	13	13	13	15	15	16	18	20	20	12.7333	-12.7854
nitazoxanide	55981-09-4	307.28	100	10	10	10	10	10	10	10	11	12	12	12	14	14			11.1538	-23.6038
lumefantrine	82186-77-4	528.94	100	12	12	12	12	12	12	13	14	14	15	15	15				13.1667	-9.81735
pyrimethamine	58-14-0	248.71	100	6	6	11	12	12	12	13	13	13	16	16	16	17	17	21	13.4	-8.21918
artesunate	88495-63-0	384.42	100	8	9	9	11	11	11	12	13	13	15	16	18				12.1667	-16.6667
pyrantel pamoate	22204-24-6	594.68	100	2	3	3	7	7	7	9	11	11	11	11	12	13	21		9.14286	-37.3777
benzyl benzoate	120-51-4	212.24	100	2	6	6	10	12	13	14	15	15	15	16	16	16	19		12.5	-14.3836
triclabendazole	68786-66-3	359.66	100	4	4	7	10	10	10	10	11	11	11	12	12	12	12	14	10	-31.5068
dinitolmide	148-01-6	225.16	100	10	13	13	13	13	13	15	15	16	16	16	16	19	20	22	15.3333	5.02283
decoquinate	18507-89-6	417.54	100	3	3	9	11	15	16	17	17	17	17	17	18	18	20		14.1429	-3.13112
artemether	71963-77-4	298.37	100	12	13	14	15	15	15	16	16	16	16	16	17	18	19	21	15.9333	9.13242
tetramisole hydrochloride	5086-74-8	240.75	100	2	3	3	3	6	10	12	14	15	15						8.3	-43.1507
primaquine diphosphate	63-45-6	455.34	100	12	12	12	13	16	18	19	19	19	19	19	19	19	19	19	16.9333	15.9817
ronidazole	7681-76-7	200.15	100	2	8	9	10	11	12	13	14	15	15	16	16	16	16	18	12.7333	-12.7854
4-hexyl-1,3-benzenediol	136-77-6	194.27	100	4	9	12	13	13	14	16	17	17	18	18	19	20	21	22	15.5333	6.39269
2-acetamido-5-nitrothiazole	140-40-9	187.18	100	3	6	7	9	11	13	13	15	16	16	17	18	19	19	19	13.4	-8.21918
artemisinin	63968-64-9	282.33	100	7	9	12	12	15	17	17	17	17	17	18	19	21			15.2308	4.32034
thiabendazole	148-79-8	201.25	100	2	9	9	9	9	12	12	12	13	14	14	15	15	16	17	11.8667	-18.7215
acrichin dihydrochloride	69-44-3	428.78	100	9	12	12	12	12	12	14	16	16	16	16	17	17	17		14.1429	-3.13112
oxfendazole	53716-50-0	315.35	100	9	9	11	11	11	11	13	13	13	13	13	13	16	17	21	12.9333	-11.4155
bithionol	97-18-7	356.05	100	3	3	5	6	11	12	12	12	12	12	16	17	17	19	19	11.7333	-19.6347
toltrazuril	69004-03-1	425.38	100	5	5	10	12	12	13	15	15	15	15	17	17	18	18		13.3571	-8.51272
diethylcarbamazine citrate	1642-54-2	391.42	100	6	11	12	12	12	14	14	15	15	16	16	17	17	17	21	14.3333	-1.82648
hygromycin B	31282-04-9	527.52	100	3	3	3	3	3	3	3	3	3	3	4	5				3.25	-77.7397
mebendazole	31431-39-7	295.29	100	5	5	8	9	11	13	13	14	14	14	14	17	19			12	-17.8082
flubendazole	31430-15-6	313.28	100	3	9	11	12	12	12	13	14	14	14	14	14	14	16	16	12.5333	-14.1553
fenbendazole	43210-67-9	299.35	100	3	3	8	10	10	10	12	12	13	14	15	15	17	17	18	11.8	-19.1781
nicarbazin	330-95-0	426.38	100	2	6	8	9	12	13	13	15	17	17	17	19	19	20		13.3571	-8.51272
arecoline hydrobromide	300-08-3	236.11	100	6	10	10	10	10	11	14	16	17	20	21	21	22	23	19	15.3333	5.02283
alpha,2-dimethyl-5-nitro-1H-imidazole-1-ethanol	3366-95-8	185.18	100	8	10	15	15	16	17	17	20	20	22	22	22	23	23		17.8571	22.3092
repaglinide	135062-02-1/108157-52-4	452.59	100	2	2	2	2	2	2	2	2	3	3	3	3				2.33333	-84.0183
glimepiride	93479-97-1	490.62	100	2	2	2	2	2	2	3	3	3	3						2.4	-83.5616
chlorpropamide	94-20-2	276.74	100	2	6	14	15	15	16	16	18	19	20	20	20	22	23	23	16.6	13.6986
gliclazide	21187-98-4	323.41	100	7	8	8	14	15	15	17	17	17	19	19	23				14.9167	2.16895
nateglinide	105816-04-4	317.42	100	2	8	11	12	12	16	17	18	20	21	22					14.4545	-0.996264
vildagliptin	274901-16-5	303.4	100	3	4	7	10	10	12	15	17	18	20	20	20	22	23	23	14.9333	2.28311
miglitol	72432-03-2	207.22	100	2	6	8	14	15	15	17	17	17	19	21	21	22	23		15.5	6.16438
voglibose	83480-29-9	267.28	100	2	2	3	5	5	8	8	9	12	17	17	21	21	23	23	11.7333	-19.6347
rosiglitazone hydrochloride	302543-62-0	393.89	100	2	2	2	3	4	4	8	12	14	16	16	18	20	20	21	10.8	-26.0274
gliquidone	33342-05-1	527.63	100	4	9	9	9	9	9	10	11	11	11	13	14	14			10.2308	-29.9262
glibenclamide	10238-21-8	494	100	4	8	9	9	12	16	17	17	17	17	17	17	20	22	22	14.9333	2.28311
glipizide	29094-61-9	445.54	100	4	4	9	9	11	14	15	18	18	19	19	22	23	23		14.8571	1.76125
tolbutamide	64-77-7	270.35	100	2	2	2	2	2	5	5	9	11	15	16	16	19	19	20	9.66667	-33.79
alogliptin benzoate	850649-62-6	461.52	100	12	12	13	15	19	19	19	19	19	23						17	16.4384
sitagliptin phosphate monohydrate	654671-77-9	523.32	100	2	5	10	9	12	14	15	17	17	18	20	20	20	21	22	14.8	1.36986
phenformin hydrochloride	834-28-6	241.72	100	2	2	2	3	12	12	13	13	15	16	16	17	17	18	22	12	-17.8082
canagliflozin	842133-18-0	462.15	100	1	2	3	8	10	13	14	14	14	17	17	19	20	22	23	13.1333	-10.0457
empagliflozin	864070-44-0	450.91	100	2	2	4	7	9	9	12	13	17	17	18	18	19	20	20	12.4667	-14.6119
acarbose	56180-94-0	645.6	100	1	1	1	2	4	4	4	11	12	13	17	17	17	19	20	9.53333	-34.7032
epalrestat	82159-09-9	319.4	100	2	6	11	11	12	12	17	17	19	19	19	20	21	22	22	15.3333	5.02283
linagliptin	668270-12-0	472.54	100	4	8	10	11	11	11	12	13	16	17	17	18	19	19	19	13.6667	-6.39269
sitagliptin	486460-32-6	407.32	100	1	1	2	2	7	7	12	12	12	14	14	14	16	16	19	9.93333	-31.9635
trelagliptin	865759-25-7	357.38	100	1	2	2	4	8	12	12	13	13	13	17	18	20	20	20	11.6667	-20.0913
beclomethasone dipropionate	5534-09-8	521.04	100	4	11	14	15	16	16	16	17	17	17	17	17	17	19	19	15.4667	5.93607
prednisolone	50-24-8	360.44	100	2	2	2	2	2	2	12	13	14	14	15	16	16	16	17	9.66667	-33.79
methylprednisolone	83-43-2	374.47	100	1	1	9	13	14	15	16	16	16	16	17	18	20	21	21	14.2667	-2.28311
dexamethasone	50-02-2	392.46	100	2	3	5	5	5	6	12	13	13	16	16	16	17	17	21	11.1333	-23.7443
hydrocortisone	50-23-7	362.46	100	8	10	12	15	16	16	17	17	20	20	21	21	22	23	23	17.4	19.1781
meprednisone	1247-42-3	372.45	100	2	4	5	11	11	11	11	12	12	12	15	17	17	17	19	11.7333	-19.6347
dexamethasone 21-phosphate disodium salt	2392-39-4	516.4	100	2	6	11	12	12	14	15	16	17	18	18	19	19	22	26	15.1333	3.65297
halcinonide	3093-35-4	454.96	100	1	1	2	2	2	8	10	16	17	17	18	18	19	20	23	11.6	-20.5479
triamcinolone acetonide	76-25-5	434.5	100	4	4	10	12	12	14	15	15	16	16	17	17	19	19	20	14	-4.10959
(R)-budesonide	51372-29-3	430.53	100	2	2	2	4	4	4	5	5	13	17	17	19	19	21	21	10.3333	-29.2237
betamethasone	378-44-9	392.46	100	1	1	1	2	8	13	13	14	16	16	17	17	19	20	20	11.8667	-18.7215
betamethasone 17,21-dipropionate	5593-20-4	504.59	100	5	5	5	13	13	15	15	19	19	19	19	20	22	22	24	15.6667	7.30594
clobetasol propionate	25122-46-7	466.97	100	2	2	3	12	14	15	15	16	16	17	17	17	18	20	22	13.7333	-5.93607
fluocinolone acetonide	67-73-2	512.22	100	1	1	14	16	18	19	19	21	21	21	21	21	23	24	28	17.8667	22.3744
cortisone acetate	50-04-4	402.48	100	2	2	3	8	11	13	13	13	13	17	20	20	21	21	22	13.2667	-9.13242
triamcinolone	124-94-7	394.44	100	1	1	2	13	13	17	19	20	20	21	21	22	22	23	23	15.8667	8.6758
deoxycorticosterone acetate	56-47-3	372.5	100	1	1	2	2	13	14	14	14	16	16	17	17	17	20	20	12.2667	-15.9817
fludrocortisone acetate	514-36-3	422.49	100	2	2	12	12	14	14	14	15	16	16	17	17	21	21	21	14.2667	-2.28311
finasteride	98319-26-7	372.54	100	1	10	11	11	12	14	14	14	15	15	15	16	16	16	19	13.2667	-9.13242
raloxifene	84449-90-1	473.58	100	8	11	12	12	12	12	12	12	12	12	13	14	14	15	17	12.5333	-14.1553
tibolone	5630-53-5	312.45	100	1	4	12	12	12	12	14	14	14	16	16	16	17	20	21	13.4	-8.21918
mifepristone	84371-65-3	429.59	100	3	4	8	11	12	13	14	14	16	16	16	17	17	18	19	13.2	-9.58904
levonorgestrel	797-63-7	312.45	100	4	5	12	13	13	13	14	14	16	16	16	17	18	19	20	14	-4.10959
ethynyl estradiol	57-63-6	296.4	100	1	2	2	2	2	12	12	13	13	13	14	19	19	19	21	10.9333	-25.1142
sildenafil citrate	171599-83-0	666.7	100	1	2	2	2	5	12	12	13	15	15	16	17	17	18	19	11.0667	-24.2009
progesterone	57-83-0	314.46	100	1	1	1	7	12	12	12	12	12	12	12	16	18	19	21	11.2	-23.2877
testosterone propionate	57-85-2	344.49	100	2	11	12	12	12	12	12	14	14	14	14	16	17	21	22	13.6667	-6.39269
bicalutamide	90357-06-5	430.37	100	1	2	12	13	13	13	15	16	16	16	16	16	16	16	16	13.1333	-10.0457
17a-hydroxyprogesterone caproate	630-56-8	428.6	100	1	1	2	12	12	12	14	14	16	16	17	19	22	22	24	13.6	-6.84932
diethylstilbestrol	56-53-1	268.35	100	2	7	10	10	11	13	14	17	17	17	18	19	20	20	20	14.3333	-1.82648
tadalafi	171596-29-5	377.44	100	1	10	12	13	13	14	14	14	14	15	16	16	16	16	16	13.3333	-8.6758

## Sheet: 1st round screening-9
Drug Name	CAS Number	Molecular Number	Concentration (μM)	lifespan of each worm (days)															Mean Lifespan (days)	Lifespan Extension % (of Ctrl)
				1st	2nd	3rd	4th	5th	6th	7th	8th	9th	10th	11th	12th	13th	14th	15th
Control group			0	4	7	14	15	15	16	16	16	17	18	18	18	18	19	20	15.4
clomiphene citrate	50-41-9	598.08	100	1	3	7	7	9	9	10	10	11	11	15	17	20	20	20	11.3333	-26.4069
dutasteride	164656-23-9	528.53	100	3	3	3	6	7	7	7	7	7	10	14	15	18	20	21	9.86667	-35.9307
promestriene	39219-28-8	328.49	100	12	14	15	16	16	16	16	16	17	18	19	19	20	20	20	16.9333	9.95671
norethindrone	68-22-4	298.42	100	13	14	14	15	15	16	16	16	17	17	17	17	17	18	26	16.5333	7.35931
ethynodiol diacetate	297-76-7	384.51	100	6	13	15	15	16	16	16	16	17	17	17	17	17	21	22	16.0667	4.329
estradiol benzoate	50-50-0	376.49	100	2	3	5	10	10	14	16	16	16	16	17	17	17	17	20	13.0667	-15.1515
avanafil	330784-47-9	483.95	100	13	14	15	15	15	15	16	16	16	16	16	16	17	18	18	15.7333	2.1645
drospirenone	67392-87-4	366.49	100	1	3	3	10	13	15	15	15	16	16	17	17	17	18	20	13.0667	-15.1515
mestanolone	521-11-9	304.47	100	2	6	8	12	14	14	17	18	18	19	20	20	21	22	22	15.5333	0.865801
ethisterone	434-03-7	312.45	100	9	10	10	13	14	15	15	17	17	18	18	19	20	20	21	15.7333	2.1645
yohimbine hydrochloride	65-19-0	390.9	100	2	2	3	8	11	12	12	12	13	14	15	15	17	17	19	11.4667	-25.5411
quinestrol	152-43-2	364.52	100	2	2	2	6	7	7	9	11	12	13	14	15	15	16	17	9.86667	-35.9307
ritodrine hydrochloride	23239-51-2	323.81	100	6	8	10	14	14	14	14	15	15	17	18	18	18	20	24	15	-2.5974
17a-ethynyl-1,3,5(10)-estratriene-3,17b-diol 3-methyl ether	72-33-3	310.43	100	13	14	14	14	15	15	17	18	18	19	20	21	21	22	22	17.5333	13.8528
megestrol acetate	595-33-5	384.51	100	7	10	15	16	16	17	17	18	18	18	19	19	22	22	23	17.1333	11.2554
17-methyltestosterone	58-18-4	302.45	100	5	14	14	16	17	17	17	18	18	18	19	19	22	23	24	17.4	12.987
1,3,5(10)-estratrien-3-ol-17-one	53-16-7	270.37	100	1	2	6	6	10	12	13	16	16	18	20	21	21	22	23	13.8	-10.3896
trenbolone acetate	10161-34-9	312.4	100	10	14	14	14	14	14	14	16	16	16	16	17	17	17	19	15.2	-1.2987
chlormadinone acetate	302-22-7	404.93	100	10	10	10	10	12	12	14	15	15	15	16	16	16	17	18	13.7333	-10.8225
gossypol-acetic acid	12542-36-8	578.61	100	2	8	10	12	12	13	14	15	15	16	16	17	18	18	19	13.6667	-11.2554
stanolone	521-18-6	290.44	100	9	11	12	16	17	17	17	18	18	19	21	21	22			16.7692	8.89111
medroxyprogesterone	520-85-4	344.49	100	10	13	14	14	15	15	16	16	18	19	19	19	19	20	21	16.5333	7.35931
methyltrienolone	965-93-5	284.39	100	2	2	7	11	12	12	13	13	16	16	19	19	20	20	21	13.5333	-12.1212
estriol	50-27-1	288.38	100	6	17	17	17	18	18	18	18	18	19	20	20	20	20	25	18.0667	17.316
gestodene	60282-87-3	310.43	100	1	2	8	14	14	14	15	16	16	16	16	17	18	18	20	13.6667	-11.2554
stanozolol	10418-03-8	328.49	100	5	8	12	15	15	15	16	16	16	16	16	17	19	20	22	15.2	-1.2987
androstenedione	63-05-8	286.41	100	2	2	2	7	13	15	15	16	18	19	20	20	20	21	21	14.0667	-8.65801
pregnenolone acetate	1778-02-5	358.51	100	2	2	6	6	12	12	13	17	17	19	20	20	20	21	22	13.9333	-9.52381
cyproterone acetate	427-51-0	416.94	100	10	10	10	12	12	12	14	14	15	15	16	16	18	18	20	14.1333	-8.22511
allylestrenol	432-60-0	300.48	100	3	8	13	14	14	15	15	16	16	16	16	17	17	18	19	14.4667	-6.06061
methimazole	60-56-0	114.17	100	2	5	6	10	11	12	13	14	15	16	16	16	17	18	22	12.8667	-16.4502
propylthiouracil	51-52-5	170.23	100	5	11	11	16	16	16	17	17	18	18	18	19	20	20	21	16.2	5.19481
disodium pamidronate	109552-15-0	279.03	100	3	10	10	14	15	15	16	17	18	18	20	20	20	20	21	15.8	2.5974
cinacalcet	226256-56-0	357.41	100	3	3	8	8	10	10	10	14	17	17	18	18	20	20		12.5714	-18.3673
carbimazole	22232-54-8	186.23	100	3	6	8	10	13	13	15	15	15	16	17	18	19	20	21	13.9333	-9.52381
L-thyroxine	51-48-9	776.87	100	10	11	12	12	14	16	16	17	18	19	20	21	21	21	22	16.6667	8.22511
nandrolone phenylpropionate	62-90-8	406.56	100	9	11	12	12	15	15	15	17	17	18	18	19	19	21		15.5714	1.11317
(+)-pilocarpine hydrochloride	54-71-7	244.72	100	2	3	3	3	9	12	12	13	15	15	15	17	19	20	23	12.0667	-21.645
bethanechol	590-63-6	196.68	100	2	2	14	15	15	16	16	16	17	18	18	18	19	19	20	15	-2.5974
ipratropium bromide	22254-24-6	412.36	100	2	6	10	11	12	12	13	13	14	14	14	15	17	19	19	12.7333	-17.316
raceanisodamine	134355-54-7	335.44	100	8	8	13	15	15	18	18	20	20	20	20	21	21	21	25	17.5333	13.8528
atropine sulfate	55-48-1	676.82	100	8	8	10	12	14	15	15	15	16	17	17	19	21	25		15.1429	-1.66976
mestinon	101-26-8	261.12	100	10	13	13	15	16	17	17	18	19	20	20	20	21	21	22	17.4667	13.4199
neostigmine bromide	114-80-7	303.2	100	6	8	10	10	10	14	14	16	16	17	18	20	20	22	23	14.9333	-3.0303
scopolamine hydrobromide	114-49-8	384.26	100	1	3	3	11	12	15	16	16	16	17	17	17	18	20	21	13.5333	-12.1212
dicyclomine hydrochloride	67-92-5	345.95	100	8	10	11	11	14	16	17	18	19	20	20	20	20	21	21	16.4	6.49351
glycopyrrolate	596-51-0	398.33	100	7	8	11	14	16	17	18	18	19	20	21	21	22	23	25	17.3333	12.5541
tropicamide	1508-75-4	284.35	100	3	3	13	13	13	13	14	16	16	16	17	18	18	21	22	14.4	-6.49351
homatropine hydrobromide	51-56-9	356.25	100	7	11	12	13	13	15	15	15	18	19	19	20	20	21	22	16	3.8961
benactyzine hydrochloride	57-37-4	363.88	100	11	13	14	15	16	17	18	19	19	20	20	20	21	22	22	17.8	15.5844
penehyclidine hydrochloride (mixture of isomers)	151937-76-7	350.20	100	2	5	10	12	15	15	16	16	16	16	17	17	17	22	23	14.6	-5.19481
ephedrine hydrochloride	50-98-6	201.69	100	7	8	14	15	15	15	15	16	16	17	17	18	20	21	25	15.9333	3.4632
brimonidine tartrate	70359-46-5	442.22	100	3	5	10	14	15	16	16	17	18	18	18	20	20	21	21	15.4667	0.4329
(R)-phenylephrine hydrochlorid	61-76-7	203.67	100	9	12	12	13	13	13	18	18	18	18	20	21	22	22	24	16.8667	9.52381
xylometazoline hydrochloride	1218-35-5	280.84	100	1	1	9	11	12	15	20	21	21	21	21	23	23	24	24	16.4667	6.92641
naphazoline	835-31-4	246.74	100	10	13	14	16	17	19	19	21	21	21	21	22	22	23	23	18.8	22.0779
xylazine	7361-61-7	220.33	100	1	2	4	6	6	12	14	14	16	17	20	20	20	21	23	13.0667	-15.1515
vitamin B6	8059-24-3	231.14	100	2	7	16	16	17	20	20	20	21	21	22	23	23	24	24	18.4	19.4805
vitamin E	59-02-9/121854-78-2/18920-62-2/364-49-8/364-50-1/16826-11-2	430.71	100	5	5	10	10	11	15	17	17	17	17	18	18	18	18	19	14.3333	-6.92641
mecobalamin	13422-55-4	1344.38	100	2	3	11	13	13	14	14	15	15	17	17	17	17	17	21	13.7333	-10.8225
L(+)-ascorbic acid	50-81-7	176.12	100	5	6	6	10	10	15	15	16	17	17	17	18	18	18	19	13.8	-10.3896
folic acid	59-30-3	441.4	100	10	12	12	15	15	15	16	16	16	16	17	17	17	17	15	15.0667	-2.1645
nicotinamide	98-92-0	122.12	100	5	13	14	15	15	17	17	18	18	18	18	18	18	18		15.8571	2.96846
inositol	87-89-8	180.16	100	4	7	12	16	16	17	18	18	18	19	19	19	19	20	22	16.2667	5.62771
fursultiamine	804-30-8	398.54	100	2	2	10	11	12	13	14	15	16	17	22	22	22	23	25	15.0667	-2.1645
all-trans-retinol	68-26-8/11103-57-4	286.45	100	2	6	13	13	15	15	15	17	17	17	19	19	21	22	24	15.6667	1.7316
thiamine chloride	59-43-8	300.81	100	13	13	13	14	14	14	15	15	15	16	16	17	19	19	20	15.5333	0.865801
vitamin D3	67-97-0/8024-19-9/8050-67-7	384.64	100	12	14	14	14	14	16	16	16	17	17	17	19	19			15.7692	2.3976
vitamin D2	50-14-6	396.65	100	2	6	7	13	13	14	14	14	15	15	16	16	17	17	17	13.0667	-15.1515
hesperidin	520-26-3	610.56	100	4	11	13	13	14	14	15	16	17	18	18	19	20	20	21	15.5333	0.865801
pyridoxal hydrochloride	65-22-5	203.62	100	7	10	11	13	14	15	15	16	16	17	17	17	18	18		14.5714	-5.38033
vitamin K1	84-80-0	452.71	100	11	11	13	13	14	15	15	15	16	17	17	17	18	18	21	15.4	0
vitamin B12	68-19-9	1355.38	100	3	7	8	9	15	15	16	17	17	17	18	18	19	20	21	14.6667	-4.7619
adenine phosphate salt	70700-30-0	233.12	100	2	12	13	13	13	14	14	14	16	16	16	17	17	18	19	14.2667	-7.35931
pyridoxine hydrochloride	58-56-0	205.64	100	2	3	3	8	10	11	13	13	15	15	15	15	16	16	16	11.4	-25.974
lipoic acid	62-46-4	206.33	100	9	11	12	14	15	15	16	16	17	17	17	17	19	20		15.3571	-0.278293
riboflavin	83-88-5	376.36	100	3	3	3	5	8	11	14	14	14	15	17	17	18			10.9231	-29.0709
riboflavin 5'-monophosphate sodium salt	130-40-5	478.33	100	5	7	7	10	13	13	15	15	15	17	17	17	17	17	17	13.4667	-12.5541
5'-deoxyadenosylcobalamin	13870-90-1	1579.58	100	2	4	11	12	12	14	14	15	15	15	15	15	16	19	20	13.2667	-13.8528
retinyl acetate	127-47-9	328.49	100	11	12	14	15	15	16	16	16	17	17	17	19	20	25	25	17	10.3896
menadiol diacetate	573-20-6	258.27	100	7	9	11	12	12	12	12	12	12	13	14	14	15	15	16	12.4	-19.4805
nicotinic acid	59-67-6	123.11	100	5	6	12	14	14	15	16	16	16	16	17	17	17	17	18	14.4	-6.49351
D-biotin	58-85-5	244.31	100	7	7	10	11	14	14	14	15	15	15	15	17	17	19	20	14	-9.09091
orotic acid	65-86-1	156.1	100	6	11	12	14	15	15	15	15	16	16	16	17	17	18	19	14.8	-3.8961
pyridoxine	65-23-6	169.18	100	5	11	12	12	12	15	17	17	17	20	20	20	20	21	22	16.0667	4.329
benfotiamine	22457-89-2	466.45	100	8	8	10	11	12	14	15	16	16	17	17	17	17	18	20	14.4	-6.49351
menadione	58-27-5	172.18	100	4	10	12	12	13	13	14	14	15	15	15	15	15	15	17	13.2667	-13.8528
pyridoxamine dihydrochloride	524-36-7	241.11	100	2	14	15	15	15	16	16	17	17	17	17	19	20	20	20	16	3.8961
mycophenolate mofetil	128794-94-5/115007-34-6	433.49	100	5	15	15	15	15	17	17	17	17	17	18	18	18	18	19	16.0667	4.329
cyclosporin A	59865-13-3	1202.61	100	7	7	7	7	7	13	15	15	15	15	17	17	17	20		12.7857	-16.9759
desloratadine	100643-71-8	310.82	100	1	1	1	5	6	7	12	13	13	14	14	16	17	19	23	10.8	-29.8701
levamisole	14769-73-4	204.29	100	1	1	1	1	1	1	2	2	2	3	3	7	10	11	13	3.93333	-74.4589
epinastine	80012-43-7	249.31	100	1	7	8	12	14	16	16	16	16	16	17	17	18	19	20	14.2	-7.79221
rupatadine fumarate	158876-82-5	233.98	100	4	10	10	12	12	12	15	15	15	15	16	16	16	17	19	13.6	-11.6883
fluticasone propionate	80474-14-2	500.57	100	3	4	12	12	15	15	15	15	16	17	20	21	23	24	26	15.8667	3.0303
mycophenolic acid	24280-93-1	320.34	100	8	12	13	14	14	14	15	15	16	17	17	17	18	18	23	15.4	0
diacerein	13739-02-1	368.29	100	2	5	6	10	13	13	13	14	15	15	16	16	17	17	17	12.6	-18.1818
pidotimod	121808-62-6	244.27	100	5	6	9	10	12	13	14	15	15	15	16	16	17	17	17	13.1333	-14.7186
ferrous lactate	5905-52-2	218.22	100	5	7	8	9	9	10	10	13	13	14	16	16	17	17	19	12.2	-20.7792
zinc lactate	16039-53-5	476.53	100	12	12	15	15	15	15	15	16	16	16	16	16	16	16	17	15.2	-1.2987
calcium lactate	814-80-2	171.92	100	8	12	13	13	14	15	15	15	15	16	16	16	17	18	20	14.8667	-3.4632
ferrous fumarate	141-01-5	179.2	100	11	12	12	12	13	15	15	15	16	16	17	17	18	19	20	15.2	-1.2987
potassium citrate	866-84-2	136.06	100	3	5	7	10	14	14	14	15	16	16	16	16	17	20	21	13.6	-11.6883
L-lysine hydrochloride	10098-89-2	182.65	100	2	8	10	13	14	14	15	16	16	17	19	19	19	21		14.5	-5.84416
L-aspartic acid	56-84-8	133.1	100	10	14	15	15	15	15	16	16	16	16	16	19	19	20	21	16.2	5.19481
L-proline	147-85-3/344-25-2	115.13	100	9	12	14	16	16	17	18	19	19	19	19	20	20	21	22	17.4	12.987
cysteine hydrochloride	10318-18-0	157.62	100	11	13	14	15	16	16	17	17	17	17	18	18	19	20	20	16.5333	7.35931
DL-methionine	59-51-8	149.21	100	3	3	7	8	8	13	13	15	16	16	16	16	17	17	22	12.6667	-17.7489
L(+)-arginine	74-79-3	174.2	100	4	5	12	12	12	13	13	14	15	16	17	18	19	20	20	14	-9.09091
L-isoleucine	131598-62-4	131.17	100	9	10	11	12	12	13	14	15	15	15	15	16	16	16	16	13.6667	-11.2554
glycine	56-40-6	75.07	100	5	7	13	15	15	15	15	16	16	16	16	16	17	17	18	14.4667	-6.06061
DL-tyrosine	556-03-6	281.3	100	8	8	9	12	12	12	13	13	13	14	15	16	16	17	20	13.2	-14.2857
valine	7004-03-7	117.15	100	2	2	7	12	13	13	16	16	16	16	16	16	17	17	22	13.4	-12.987
N-carbobenzoxy-DL-leucine	3588-60-1	265.3	100	5	7	12	14	16	16	16	16	16	17	18	18	18	21	15	15	-2.5974
DL-phenylalanine	150-30-1	165.19	100	7	10	14	14	15	15	16	17	17	18	18	18	19	21	21	16	3.8961
L-glutamic acid	56-86-0	147.13	100	4	9	12	12	13	13	14	14	15	15	15	16	17	17	17	13.5333	-12.1212
D-alanine	338-69-2	89.09	100	7	10	12	12	13	15	16	16	17	17	17	17	17	18	21	15	-2.5974
tryptophan	73-22-3	204.23	100	7	9	10	11	14	14	15	15	15	15	15	16	17	17		13.5714	-11.8738
cycloserine	68-41-7	102.09	100	10	10	10	10	12	12	15	15	17	17	17	18	20	21	21	15	-2.5974
afalanine	2901-75-9	207.23	100	9	12	13	14	14	15	15	15	15	15	16	16	17	17	17	14.6667	-4.7619
L-glutamine	56-85-9	146.14	100	3	5	6	11	12	12	14	15	17	17	18	19	21	21	26	14.4667	-6.06061
adenosine 5'-monophosphate	61-19-8	347.22	100	8	10	12	13	13	14	14	15	16	16	16	17	17	17		14.1429	-8.16327
2'-deoxyadenosine monohydrate	16373-93-6	251.25	100	7	7	13	14	14	15	15	15	17	17	17	18	19	19	20	15.1333	-1.7316
N-acetyl-L-cysteine	616-91-1	163.19	100	8	12	14	15	16	17	17	17	17	17	17	17	17	20	20	16.0667	4.329
S-adenosyl-l-methionine	29908-03-0	400.45	100	12	15	15	15	16	16	16	16	17	17	17	21	21	23	24	17.4	12.987

## Sheet: 1st round screening-10
Drug Name	CAS Number	Molecular Number	Concentration (μM)	lifespan of each worm (days)															Mean Lifespan (days)	Lifespan Extension % (of Ctrl)
				1st	2nd	3rd	4th	5th	6th	7th	8th	9th	10th	11th	12th	13th	14th	15th
Control group			0	1	9	13	16	16	17	17	18	18	18	20	20	20	20	20	15.9333
				4	6	9	15	16	16	17	17	18	18	19	20	20	20	20
butafosfan	17316-67-5	179.2	100	3	3	9	13	15	15	15	16	17	17	17	18	18	19		13.9286	-12.5822
calcium phosphate dibasic	7757-93-9	172.09	100	11	15	15	15	15	16	16	17	17	17	18	18	18	19	20	16.4667	3.34728
L-carnitine	541-15-1	161.2	100	10	12	13	14	15	15	16	16	16	17	17	18	18	18	19	15.6	-2.09205
zinc gluconate	4468-02-4	455.68	100	12	13	14	15	15	15	16	16	17	17	18	18	19	21	16.14	16.1427	1.31381
loxapine succinate salt	27833-64-3	445.9	100	1	3	7	10	12	16	17	18	19	19	19	20	20	20	26	15.1333	-5.02092
ferric citrate pentahydrate	6043-74-9	244.94	100	4	12	13	14	14	14	15	15	15	15	15	16	17	17	17	14.2	-10.8787
L-alanyl-L-glutamine	39537-23-0	217.22	100	8	12	13	14	14	15	16	16	16	18	19	20	20	20	22	16.2	1.67364
sodium gluconate	527-07-1	218.14	100	3	10	11	16	16	17	17	17	18	18	19	19	19	20	20	16	0.41841
mepivacaine	22801-44-1	246.35	100	7	13	13	14	14	15	15	15	16	16	16	18	19	19	20	15.3333	-3.76569
tetracaine hydrochloride	136-47-0	300.82	100	14	15	15	15	16	16	16	17	17	18	18	18	18	18	18	16.6	4.1841
ropivacaine	84057-95-4	274.4	100	10	14	15	16	16	16	17	17	17	17	18	18	18	18	20	16.4667	3.34728
cinchocaine	85-79-0	343.46	100	7	12	15	15	16	16	16	16	17	18	18	18	18	19	20	16.0667	0.83682
bupivacaine hydrochloride	14252-80-3	324.89	100	10	11	11	14	15	15	16	16	16	17	17	18	19	19	19	15.5333	-2.51046
articaine hydrochloride	23964-57-0	320.84	100	11	13	14	14	15	16	17	17	17	18	18	18	20	20	21	16.6	4.1841
lidocaine	137-58-6	234.17	100	13	14	15	15	15	15	16	16	16	17	17	18	18	18	18	16.0667	0.83682
Procaine hydrochloride	51-05-8	272.77	100	2	2	12	13	15	15	16	17	17	17	17	17	18	18	20	14.4	-9.62343
benzocaine	94-09-7	165.19	100	7	10	14	14	16	17	17	17	18	18	18	18	18	19	19	16	0.41841
propofol	2078-54-8	178.27	100	4	12	14	15	16	16	16	16	17	18	18	18	19	19	21	15.9333	0
dexmedetomidine hydrochloride	145108-58-3	236.74	100	13	13	14	14	15	16	16	16	17	17	17	18	18	18	19	16.0667	0.83682
propitocaine hydrochloride	1786-81-8	256.77	100	14	16	17	17	17	17	18	18	18	18	19	19	19	21	17.71	17.714	11.1757
etomidate	33125-97-2	244.29	100	11	13	14	14	15	15	15	15	16	16	16	16	17	17	15	15	-5.85774
benoxinate Hydrochloride	5987-82-6	344.88	100	11	11	14	15	16	16	17	18	18	18	18	19	19	20	20	16.6667	4.60251
pramoxine hydrochloride	637-58-1	329.86	100	8	9	13	13	13	13	15	15	16	16	16	16	16	16	17	14.1333	-11.2971
levobupivacaine hydrochloride	27262-48-2	324.89	100	8	15	15	15	15	16	17	18	18	18	19	19	19	20	20	16.8	5.43933
procaine	59-46-1	236.31	100	8	10	10	12	13	15	18	18	19	20	20	20	21	21	21	16.4	2.92887
6-methyl-2-heptanaMine	543-82-8	129.24	100	15	15	15	15	16	17	17	17	17	18	18	18	19	20	16.93	16.9287	6.24686
oxethazaine	126-27-2	467.64	100	6	7	9	13	13	13	15	16	17	18	19	21	21	22	23	15.5333	-2.51046
calcium folinate	1492-18-8	511.5	100	16	16	16	16	17	17	17	18	19	19	17.1	17.1	17.1	17.1	17.1	17.1	7.32218
povidone iodine	25655-41-8	364.95	100	1	1	8	15	15	15	16	17	18	18	18	18	19	20	21	14.6667	-7.94979
benzethonium chloride	121-54-0	448.08	100	1	1	1	1	1	1	1	1	1	1	4	6	9	11	15	3.66667	-76.9874
cetylpyridinium chloride	123-03-5	339.99	100	14	15	15	16	17	17	15.65	15.65	15.65	15.65	15.65	15.65	15.65	15.65	15.65	15.6567	-1.7364
6,9-diamino-2-ethoxyacridine lactate	1837-57-6	361.4	100	11	12	13	15	15	17	17	17	18	18	18	20	20	20	16.5	16.5	3.55649
domiphen bromide	538-71-6	414.46	100	1	1	1	3	10	11	11	11	11	12	12	12	13	16	8.92	8.928	-43.9665
potassium sorbate	24634-61-5	150.22	100	13	13	14	17	17	14.8	14.8	14.8	14.8	14.8	14.8	14.8	14.8	14.8	14.8	14.8	-7.11297
triclocarban	101-20-2	315.58	100	1	1	2	2	2	2	2	2	2	2	2	2	2	2	2	1.86667	-88.2845
gallic acid	149-91-7	170.12	100	3	4	7	10	12	13	14	15	15	17	18	19	19	22	23	14.0667	-11.7155
9-amonoacridine	90-45-9	194.23	100	12	12	13	13	13	13	14	15	15	15	16	17	19	20	14.78	14.7853	-7.20502
halazone	80-13-7	270.09	100	1	1	10	12	12	13	13	13	15	16	16	18	11.67	11.67	11.67	11.6673	-26.7741
benzalkonium chloride	8001-54-5	283.88	100	1	3	10	12	12	14	14	16	10.24	10.24	10.24	10.24	10.24	10.24	10.24	10.2453	-35.6987
thimerosal	54-64-8	404.81	100	1	2	2	3	3	3	3	3	5	6	3	3	3	3	3	3.06667	-80.7531
propylparaben	94-13-3	180.2	100	3	9	11	12	13	16	16	17	17	17	17	18	19	20	14.64	14.6427	-8.10042
methylparaben	99-76-3	152.15	100	13	13	13	13	14	14	14	15	16	17	17	18	18	20	15.35	15.3567	-3.61925
brinzolamide	138890-62-7	383.51	100	4	5	6	6	6	7	7	8	9	9	6.7	6.7	6.7	6.7	6.7	6.7	-57.9498
acetazolamide	59-66-5	222.25	100	10	14	14	15	15	16	16	17	17	18	15.2	15.2	15.2	15.2	15.2	15.2	-4.60251
sorbitol	50-70-4/98201-93-5	182.17	100	1	4	7	10	12	14	15	16	17	17	17	18	18	19	13.21	13.214	-17.0669
mannitol	87-78-5/69-65-8	182.17	100	7	8	12	13	13	14	14	14	16	17	17	19	13.66	13.66	13.66	13.6653	-14.2343
latanoprost	130209-82-4	432.59	100	12	15	15	15	18	18	18	19	19	20	20	20	20	22	17.92	17.928	12.5188
chlortetracycline hydrochloride	64-72-2	515.38	100	3	7	13	14	14	17	17	18	18	18	18	19	20	20	20	15.7333	-1.25523
bendazac L-lysine	81919-14-4	428.48	100	4	5	8	13	15	15	15	17	19	19	19	19	20	21	22	15.4	-3.34728
betaxolol hydrochloride	63659-19-8	343.89	100	15	15	16	16	16	16	16	16	19	20	20	20	20	20	20	17.6667	10.8787
bromfenac sodium	91714-93-1	356.15	100	14	16	17	17	18	18	18	18	19	19	19	19	20	20	21	18.2	14.2259
sulfacetamide	144-80-9	214.24	100	6	6	12	13	14	15	15	15	16	16	18	18	18	18	19	14.6	-8.3682
carbachol	51-83-2	182.65	100	12	13	14	14	14	14	15	15	15	17	17	18	14.83	14.83	14.83	14.8327	-6.90795
methazolamide	554-57-4	236.27	100	4	10	12	14	14	14	15	16	17	17	18	18	18	18	18	14.8667	-6.69456
dipivefrin hydrochloride	64019-93-8	387.90	100	4	15	16	16	18	18	18	19	20	21	16.5	16.5	16.5	16.5	16.5	16.5	3.55649
dorzolamide hydrochloride	130693-82-2	360.9	100	6	6	6	10	12	12	13	14	15	17	17	18	19	19	13.14	13.1427	-17.5146
oxymetazoline hydrochloride	2315-02-8	296.84	100	8	9	10	12	16	16	17	17	18	18	18	19	19	19	25	16.0667	0.83682
cyhalothrin	91465-08-6	449.85	100	6	6	13	13	15	15	15	16	16	16	17	17	17	18	18	14.5333	-8.78661
cartap hydrochloride	15263-52-2	273.8	100	12	13	13	15	17	17	17	17	18	18	18	18	19	20	20	16.8	5.43933
buprofezin	69327-76-0	305.44	100	15	16	16	17	17	18	18	18	20	20	20	20	22	22	24	18.8667	18.41
methomyl	16752-77-5	162.21	100	8	12	12	14	15	15	15	15	18	18	19	19	20	20	20	16	0.41841
trichlorfon	52-68-6	257.44	100	1	2	2	2	2	2	2	2	2	2	2	2	3	3	3	2.13333	-86.6109
pymetrozine	123312-89-0	217.23	100	4	14	15	15	15	15	16	17	17	17	17	18	18	22	15.71	15.714	-1.37657
tebufenozide	112410-23-8	352.47	100	11	11	12	12	13	14	15	15	15	16	16	16	17	18	20	14.7333	-7.53138
cyromazine	66215-27-8	166.18	100	14	15	15	15	15	16	16	16	17	17	18	18	18	18	18	16.4	2.92887
clioquinol	130-26-7	305.5	100	14	14	15	15	15	15	16	16	17	17	18	19	19	20	20	16.6667	4.60251
phenothiazine	92-84-2	199.27	100	7	12	13	13	14	14	15	15	15	15	16	17	17	17	20	14.6667	-7.94979
imidacloprid	138261-41-3	255.66	100	13	13	14	14	15	17	17	17	18	18	18	18	19	19	16.42	16.428	3.1046
1,2-dimethyl-5-nitroimidazole	551-92-8	141.13	100	10	10	12	12	14	15	15	17	17	17	18	18	18	18	20	15.4	-3.34728
piperonyl butoxide	51-03-6	338.44	100	7	12	12	15	15	15	15	16	16	16	17	18	18	18	18	15.2	-4.60251
amitraz	33089-61-1	293.41	100	5	12	14	14	15	16	16	16	16	16	16	16	17	18	20	15.1333	-5.02092
clopidol	2971-90-6	192.04	100	5	15	15	15	15	15	16	17	17	17	18	18	19	20	20	16.1333	1.25523
potassium antimonyl tartrate sesquihydrate	28300-74-5	667.87	100	4	5	12	14	14	15	15	18	18	19	20	20	23	24	24	16.3333	2.51046
diazinon	333-41-5	304.35	100	1	1	1	2	2	3	3	4	4	4	5	5	5	10	13	4.2	-73.6402
propiconazole	60207-90-1	342.22	100	13	13	14	15	15	15	16	17	17	18	18	19	19	20	21	16.6667	4.60251
triadimefon	43121-43-3	293.75	100	11	14	14	15	15	16	16	17	17	18	18	20	20	16.23	16.23	16.2307	1.86611
myclobutanil	88671-89-0	288.78	100	4	8	12	13	13	14	14	15	16	17	18	18	18	19	20	14.6	-8.3682
prochloraz	67747-09-5	376.67	100	1	1	1	2	2	2	2	2	2	2	2	2	2	3	3	1.93333	-87.8661
tetramethylthiuram disulfide	137-26-8	240.43	100	2	2	13	14	15	15	16	16	17	17	17	18	19	20	24	15	-5.85774
tebuconazole	80443-41-0	307.82	100	1	2	2	5	10	10	13	13	14	15	16	16	16	20	20	11.5333	-27.6151
difenoconazole	119446-68-3	406.26	100	7	7	9	9	9	9	10	10	10	11	11	12	12	12	13	10.0667	-36.8201
kresoxim-methyl	143390-89-0	313.35	100	7	10	10	13	14	14	16	16	16	16	17	19	19	19	19	15	-5.85774
mancozeb	8018-01-7	332.71	100	7	7	10	15	17	17	18	18	18	18	19	19	22	22	23	16.6667	4.60251
maneb	12427-38-2	265.3	100	6	12	13	14	14	14	14	15	15	15	15	15	16	16	16	14	-12.1339
zineb	12122-67-7	275.75	100	1	1	1	2	4	7	8	9	13	13	14	14	15	19	19	9.33333	-41.4226
imazalil	35554-44-0	297.18	100	1	4	15	16	16	16	17	17	17	18	18	18	19	20	20	15.4667	-2.92887
1,3-dichloro-5,5-dimethylhydantoin	118-52-5	197.02	100	3	12	14	16	17	17	18	18	18	18	19	19	20	20	22	16.7333	5.02092
fludioxonil	131341-86-1	248.19	100	12	13	14	14	15	15	16	16	16	17	17	17	18	18	18	15.7333	-1.25523
thifluzamide	130000-40-7	528.06	100	13	15	15	16	16	16	16	17	17	17	17	17	18	19	20	16.6	4.1841
bronopol	52-51-7	199.99	100	11	13	14	15	16	16	17	18	18	18	21	22	23	23	23	17.8667	12.1339
oxolinic acid	14698-29-4	261.23	100	4	6	6	7	8	9	11	12	12	15	17	18	20	11.15	11.15	11.1533	-30
dichlorophen	97-23-4	269.12	100	4	5	6	7	7	8	9	9	9	9	9	9	9	9	9	7.86667	-50.6276
climbazole	38083-17-9	292.76	100	10	13	13	15	15	15	15	16	16	16	17	18	18	18	19	15.6	-2.09205
oxyquinoline	134-31-6	388.4	100	12	15	16	17	18	18	19	21	22	25	27	19.1	19.1	19.1	19.1	19.0933	19.8326
bensulfuron methyl	83055-99-6	410.4	100	3	6	14	18	18	19	19	20	20	20	21	22	22	23	26	18.0667	13.3891
chlorimuron-ethyl	90982-32-4	414.82	100	2	11	11	13	14	15	16	16	16	17	17	17	18	18	19	14.6667	-7.94979
atrazine	1912-24-9	215.68	100	12	12	12	13	14	14	15	16	17	17	17	18	18	18	18	15.4	-3.34728
asulam	3337-71-1	230.24	100	9	11	12	13	14	14	16	16	17	17	18	18	18	18	18	15.2667	-4.1841
chlorsulfuron	64902-72-3	357.77	100	13	14	15	15	16	16	16	17	17	18	18	18	18	18	16.35	16.3567	2.6569
imazethapyr	81335-77-5	289.33	100	4	12	15	15	16	16	17	17	18	18	19	19	22	22	22	16.8	5.43933
chlorpropham	101-21-3	213.66	100	7	12	12	13	14	15	17	17	17	18	18	18	18	20	20	15.7333	-1.25523
potassium phosphate monobasic	7778-77-0	136.09	100	6	7	11	13	13	14	16	16	17	17	17	18	19	19	20	14.8667	-6.69456
gibberellic acid	77-06-5	346.37	100	3	4	13	15	16	16	16	16	17	17	18	18	18	20	20	15.1333	-5.02092
gibberellin A7	510-75-8	330.38	100	14	14	15	15	16	16	16	17	18	18	18	19	19	20	21	17.0667	7.11297
forchlorfenuron	68157-60-8	247.68	100	7	14	15	15	16	16	16	16	16	16	17	17	17	17	17	15.4667	-2.92887
thidiazuron	51707-55-2	220.25	100	4	11	12	12	13	14	15	15	16	16	17	17	18	20	20	14.6667	-7.94979
paclobutrazol	76738-62-0	293.79	100	11	12	12	15	16	16	17	18	18	18	18	19	19	20	22	16.7333	5.02092
nitrovin hydrochloride	2315-20-0	396.74	100	2	4	11	12	14	14	14	15	15	16	17	17	18	19	20	13.8667	-12.9707
carboxin	5234-68-4	235.3	100	12	14	14	16	16	16	17	17	18	18	18	19	20	22	16.92	16.928	6.24268
1-naphthaleneacetamide	86-86-2	185.22	100	8	14	14	15	16	16	16	16	16	17	18	18	18	19	20	16.0667	0.83682

[truncated: 5 more sheets: 1st round screening-11, 1st round screening-12, 1st round screening-13, 1st round screening-14, 1st round screening-15]
