# Supplementary material for: Crotamiton derivative JM03 extends lifespan and improves oxidative and hypertonic stress resistance in Caenorhabditis elegans via inhibiting OSM-9
Source: eLife. 2022 May 5;11:e72410. doi: 10.7554/eLife.72410 (PMC9071264; doi:10.7554/eLife.72410)
Supplement: Figure 1—source data 2. [file elife-72410-fig1-data2.xlsx]

## Sheet: 2nd round screening-1
Drug Name	CAS Number	Molecular Number	Concentration (μM)	lifespan of each worm(days)															Mean Lifespan (days)	Lifespan Extension % (of Ctrl)
				1st	2nd	3rd	4th	5th	6th	7th	8th	9th	10th	11th	12th	13th	14th	15th
Control group			0	13	13	13	14	15	16	16	16	17	17	17	17	18	18	21	14.85
				8	8	9	10	10	11	11	12	12	12	13	15	15	18	19
				11	11	11	14	14	16	16	17	17	17	17	18	19	20	21
				8	11	13	14	14	14	15	15	16	17	17	18	18	18	20
altretamine	645-05-6	210.28	100	4	5	8	8	10	10	11	11	11	12	14	14	15	15	18	11.5667	-22.11
				1	7	8	8	11	12	12	12	13	14	15	15	16	18	19
ifosfamide	3778-73-2	261.09	100	5	7	10	10	11	12	13	13	15	15	15	16	17	20	22	13.6	-8.41751
				10	10	10	11	11	12	12	12	14	15	16	16	17	20	21
oxaliplatin	61825-94-3	395.27	100	13	14	16	16	17	17	17	18	18	18	21	21	21			16.5714	11.5921
				8	13	13	14	14	14	15	16	17	17	17	17	18	19	25
capecitabine	154361-50-9	359.35	100	8	8	12	16	16	17	17	17	18	18	20	20	21	16	16	15.0333	1.23457
				8	10	11	12	12	14	15	16	16	16	16	17	17	17	14
aminoglutethimide	125-84-8	232.28	100	11	12	12	13	13	14	15	15	15	16	17	19	19	23		14.8214	-0.1924
				4	10	10	12	12	14	16	17	17	17	17	18	18	19
bepotastine besilate	190786-44-8	547.07	100	2	6	9	10	10	10	10	10	10	10	10	10	11	12	12	12.3667	-16.7228
				9	9	11	12	16	16	16	17	17	17	17	18	18	18	18
topotecan hydrochloride	119413-54-6	457.91	100	1	2	2	2	7	7	10	10	11	13	14	14	15	16	18	11.6667	-21.4366
				5	9	10	11	11	15	15	15	16	16	16	16	17	17	19
peramivir	229614-55-5	328.41	100	5	8	12	12	13	14	14	14	16	16	16	17	18	18	19	14.3667	-3.25477
				9	11	11	12	12	12	14	15	16	17	17	18	18	18	19
valacyclovir hydrochloride	124832-27-5	360.8	100	5	9	10	10	11	11	12	12	14	15	16	16	17	17	19	13.7667	-7.29517
				3	4	10	12	14	14	16	16	17	17	18	18	18	19	23
sofosbuvir	1190307-88-0	529.45	100	9	10	10	12	12	12	12	13	14	15	16	17	18	18	19	13.7667	-7.29517
				10	10	10	12	12	13	13	14	15	15	15	16	16	16	19
ritonavir	155213-67-5	720.96	100	8	10	10	10	10	10	10	11	11	11	11	11	13	13	15	11.5	-22.5589
				10	10	10	10	10	11	11	12	13	13	13	13	14	15	16
stavudine	3056-17-5	224.21	100	8	10	10	10	10	11	12	12	12	12	14	15	15	17	19	15	1.0101
				12	12	13	13	14	16	17	18	18	19	19	22	22	23	25
netobimin	88255-01-0	420.46	100	9	11	11	12	13	13	13	14	15	16	16	17	17	18	19	12.7	-14.4781
				7	9	9	10	10	10	11	11	11	11	12	12	13	15	16
zidovudine	30516-87-1	283.24	100	4	7	8	9	10	11	12	13	13	14	14	15	15	17		13	-12.4579
				8	11	11	13	13	13	13	15	15	15	17	17	17	18	19
tenofovir disoproxil	201341-05-1	519.44	100	7	10	10	10	10	11	11	12	12	12	13	13	15	16	20	11.6552	-21.514
				5	10	10	10	10	11	11	11	12	12	13	13	13	15
ethambutol dihydrochloride	1070-11-7	277.23	100	6	7	10	10	10	11	12	13	14	14	15	16	16	19	19	13.2	-11.1111
				4	6	10	11	11	11	12	13	16	17	17	17	18	20	21
sodium 4-aminosalicylate dihydrate	6018-19-5	211.15	100	8	10	11	12	13	14	14	14	14	15	15	15	15	15	19	14.4	-3.0303
				12	12	12	13	14	14	15	16	16	16	16	16	17	17	22
capastat sulfate	1405-37-4	752.76	100	11	11	12	12	12	12	13	13	13	15	17	17	18	18	23	15.1667	2.13244
				6	11	12	12	16	16	17	17	17	17	18	18	18	19	24
amrinone	60719-84-8	187.2	100	9	9	10	11	12	13	15	16	16	17	19	19	21			14.2143	-4.2809
				5	10	12	13	14	14	14	15	15	15	15	16	17	17	19
simendan	131741-08-7	280.28	100	8	9	9	10	10	10	10	11	11	12	12	12	13	17	11	10.5	-29.2929
				7	10	10	10	10	10	10	10	10	10	10	10	11	11	11
3-hydroxytyramine hydrochloride	62-31-7	189.64	100	5	7	9	10	11	11	11	11	13	14	15	15	15			14.3571	-3.3189
				5	16	16	17	18	18	20	21	22	17	17	17	17	17	17
bisoprolol fumarate	104344-23-2	441.52	100	9	10	11	11	12	15	16	16	16	17	17	17	17	19	22	14.5	-2.3569
				10	10	10	11	14	14	15	15	16	16	16	17	18	14	14
puerarin	3681-99-0	432.38	100	9	9	10	10	10	10	10	10	10	11	12	17	17	19		12.657	-14.7677
				5	8	10	10	12	13	14	14	14	16	17	17	17	18	19
ivabradine hydrochloride	148849-67-6	505.05	100	8	9	9	10	10	10	10	10	12	12	13	13	14	16	16	11.2667	-24.1302
				9	10	10	10	10	10	10	10	11	11	11	11	12	15	16
(+/-)-verapamil hydrochloride	152-11-4	491.06	100	4	4	5	10	12	14	15	15	17	18	19	19	20	21	25	16.2667	9.53984
				7	8	17	18	18	18	19	19	19	20	20	20	21	22	24
fosinopril sodium	88889-14-9	586.65	100	11	14	16	17	17	18	19	20	23	25	25					16.6154	11.8881
				6	7	11	11	13	16	16	16	16	17	18	18	18	22	22
azilsartan	147403-03-0	456.45	100	9	10	10	10	10	10	11	12	12	13	13	16	17	17		11.8966	-19.8885
				8	10	10	10	11	11	12	12	12	12	12	12	13	14	16
pargyline hydrochloride	306-07-0	195.69	100	7	10	10	11	14	15	16	16	17	17	17	18	18	18	22	14.1	-5.05051
				7	8	9	10	11	12	13	13	14	15	16	16	17	18	18
eplerenone	107724-20-9	414.49	100	4	10	12	12	12	12	12	13	13	13	13	13	15	15		11.8621	-20.1207
				2	7	8	9	11	11	12	12	13	13	14	15	15	16	17
guanethidine sulfate	645-43-2	296.39	100	6	9	9	10	11	12	12	12	13	14	15	15	16	17	17	14.2333	-4.15264
				2	8	12	17	17	17	17	18	18	18	18	18	18	20	21
mevastatin	73573-88-3	390.51	100	7	8	13	14	14	15	16	16	16	18	18	19	19			14.6296	-1.48398
				2	4	12	12	15	15	16	16	16	18	18	18	20	20
4-(aminomethyl)benzoic acid	56-91-7	151.16	100	7	9	10	10	11	11	11	11	12	12	12	12	13	16	17	11.5667	-22.11
				2	4	8	9	11	11	11	13	13	13	14	14	15	16	19
lanthanum carbonate	6487-39-4	457.85	100	7	7	10	11	11	11	11	11	12	12	13	13	14	16	17	13.0333	-12.2334
				3	6	9	10	12	14	15	16	16	17	18	18	20	20	21
fasudil	103745-39-7	378.32	100	4	11	11	11	12	12	13	16	16	16	17	17	18	19	19	15.4	3.7037
				3	12	13	17	17	17	18	18	18	18	18	19	19	21	22
phentolamine mesilate	65-28-1	377.46	100	3	5	7	10	12	13	14	14	14	16	16	17	18	19		14.7586	-0.615349
				3	12	13	17	17	17	18	18	18	18	18	19	19	21	22
phenobarbital sodium	57-30-7	254.22	100	3	6	9	10	12	13	13	14	16	16	17					13.84	-6.80135
				10	13	14	15	15	15	15	16	17	17	17	17	17	19
phenytoin sodium	630-93-3	274.25	100	8	10	11	11	13	14	14	14	14	15	15	16	16	16		13.8276	-6.88494
				6	6	11	12	13	14	15	15	16	17	17	17	18	18	19
levetiracetam	102767-28-2	170.21	100	6	7	10	10	11	12	12	13	13	13	14	14	14	15	18	12.6667	-14.7026
				9	10	10	11	12	12	13	13	13	14	15	15	16	16	19
ethosuximide	77-67-8	141.17	100	7	9	9	10	11	12	12	13	14	15	15	16	16	17	17	12.9667	-12.6824
				10	10	11	11	12	12	12	12	13	14	15	16	16	16	16
eslicarbazepine acetate	236395-14-5	296.32	100	9	11	11	12	12	13	16	16	16	17	17	17	17	18	19	14.2069	-4.33066
				9	11	13	13	13	13	13	14	14	15	15	16	16	16
tianeptine	66981-73-5	436.95	100	10	11	11	11	11	12	13	13	14	14	14	15	15	15	15	14.1	-5.05051
				8	13	13	14	14	14	14	14	16	17	17	18	18	19	20
amisulpride	71675-85-9	326.13	100	10	10	10	11	11	13	13	14	14	15	15	15	16	16	17	13.8	-7.07071
				11	12	12	13	13	14	14	15	15	15	15	15	16	17	17
moclobemide	71320-77-9	369.85	100	10	10	11	12	12	13	15	15	15	16	16	16	17	17		12.25	-17.5084
				3	3	5	7	9	10	11	11	11	13	15	16	17	17
vilazodone hydrochloride	163521-12-8	477.99	100	5	10	11	12	12	12	12	13	13	14	14	15	15	15	15	12.5172	-15.7088
				6	8	11	12	12	12	13	13	13	13	14	15	16	17
alpha-lobeline hydrochloride	134-63-4	373.92	100	5	10	11	12	14	14	15	15	15	15	16	16	17	18		13.1786	-11.2554
				5	6	7	11	12	12	13	14	14	15	15	16	18	18
baclofen	1134-47-0	213.66	100	9	10	10	10	10	10	11	11	12	12	13	13	14	14	17	13.5	-9.09091
				5	7	12	13	14	16	16	16	16	18	19	19	19	19	20
naloxone hydrochloride	357-08-4	363.84	100	5	6	7	10	11	11	11	11	12	15	15	15	16	18		12.4828	-15.941
				2	8	9	9	10	10	11	14	16	17	17	18	18	19	21
synephrine	94-07-5	167.21	100	9	10	10	10	11	11	12	12	12	14	16	16	16	17	18	14.2333	-4.15264
				7	8	10	12	16	16	17	17	18	18	18	18	18	18	22
clorprenaline hydrochloride	6933-90-0	250.16	100	2	4	5	8	10	10	12	13	16	16	17	17	17	18	18	12.8667	-13.3558
				10	11	11	12	12	12	13	13	14	15	15	15	15	17	18
tulobuterol hydrochloride	56776-01-3	264.19	100	7	10	11	11	12	12	13	14	15	16	16	16	16	17	18	14.3333	-3.47924
				7	9	12	12	12	13	14	14	16	16	18	18	21	22	22
eprazinone dihydrochloride	10402-53-6	453.44	100	5	7	10	11	11	13	13	15	15	15	15	16	17	18	18	13.3333	-10.2132
				7	9	10	11	13	13	13	14	14	14	15	16	16	18	18
bilastine	202189-78-4	463.61	100	7	9	9	10	11	11	11	11	11	12	13	14	14	18		11.0357	-25.6854
				5	8	8	9	9	11	11	11	11	11	12	12	14	16
cetirizine hydrochloride	83881-52-1	425.35	100	11	12	14	14	14	15	16	16	17	17	19	19				13.5769	-8.57291
				7	8	9	10	11	11	12	12	12	13	14	16	17	17
bismuth potassium citrate	57644-54-9	704.47	100	14	14	15	16	17	17	18	18	19	20	24					16.28	9.62963
				10	11	11	13	15	16	16	16	17	17	18	18	18	19
prucalopride succinate	179474-85-2	485.96	100	7	8	11	12	12	12	14	14	15	16	16	17	18			13.2593	-10.7121
				8	9	11	11	12	12	12	15	15	15	16	16	17	17
aluminum hydroxide	21645-51-2	78	100	9	10	11	11	11	11	11	11	12	13	13	14	17	18	20	13.4138	-9.67143
				4	9	11	12	12	13	13	14	16	17	18	18	19	21
orlistat	96829-58-2	495.73	100	7	11	12	12	12	13	13	13	13	14	16	17	17	18	18	13.8667	-6.62177
				5	10	11	11	11	13	15	15	15	15	17	17	18	18	19
histamine phosphate	51-74-1	307.14	100	10	11	11	12	12	13	13	14	15	15	15	15	15	16	16	12.8571	-13.4199
				10	10	10	10	10	10	11	11	12	14	16	16	17
adiphenine hydrochloride	50-42-0	347.88	100	11	11	11	12	13	14	15	15	16	16	16	16	17	18	18	14.3846	-3.1339
				11	11	12	12	14	14	15	16	16	17	17
methscopolamine bromide	155-41-9	398.29	100	7	7	9	12	12	12	12	15	16	17	17	17	18	20		12.7241	-14.3156
				8	8	8	10	10	11	11	12	12	13	14	15	15	15	16
propantheline bromide	50-34-0	448.39	100	1	6	11	12	12	14	15	17	17	18	21					14.84	-0.0673401
				12	12	12	13	13	14	16	17	19	19	19	20	20	21
choline bitartrate	87-67-2	295.33	100	5	5	11	13	14	15	16	17	17	17	17	18	18			14.3929	-3.0784
				6	8	12	13	13	14	15	16	16	16	17	17	18	19	20
choline chloride	67-48-1	139.62	100	6	6	10	10	11	13	13	15	15	17						13.04	-12.1886
				5	11	13	13	13	15	15	16	18	21	14	14	14	14	14

## Sheet: 2nd round screening-2
Drug Name	CAS Number	Molecular Number	Concentration (μM)	lifespan of each worm(days)																Mean Lifespan (days)	Lifespan Extension % (of Ctrl)
				1st	2nd	3rd	4th	5th	6th	7th	8th	9th	10th	11th	12th	13th	14th	15th	16th
Control group			0	1	2	12	12	15	16	19	20	20	20	20	20	20	22			15.5085
				1	3	13	14	16	16	17	18	18	18	21	21	22	22	24
				4	6	7	12	15	15	15	16	17	17	17	18	18	21	26
				4	6	8	11	14	16	16	16	17	17	20	20	20	21	22
creatinine	60-27-5	113.12	100	7	10	10	10	10	11	12	12	14	15	16	17					13.6538	-11.9588
				11	11	13	13	14	15	15	15	16	16	16	17	18	21
orazamide	2574-78-9	282.21	100	3	4	10	10	11	12	14	14	15	16	17	17					11.8	-23.9126
				6	7	7	9	9	11	11	13	13	14	14	16	22
sodium oleate	143-19-1	304.44	100	4	6	10	15	16	16	18	18	19	20	21	23					13.5769	-12.4548
				8	8	8	8	10	10	12	12	12	13	15	16	17	18
S-adenosyl-L-methionine	29908-03-0	400.45	100	2	10	12	12	12	12	12	12	12	14	14	15	15	15	16		13.5161	-12.8468
				6	10	10	13	13	13	15	15	15	15	16	17	17	19	19	21
naftopidil dihydrochloride	57149-07-2	392.49	100	2	6	7	7	7	11	12	13	14	14							10.619	-31.5275
				6	7	9	10	10	10	12	12	13	15	26
ampiroxicam	99464-64-9	447.46	100	7	13	13	15	16	16	17	17	17	17	21	21	24	26			15.7143	1.32709
				10	11	11	11	11	12	15	15	15	16	17	18	18	20
4-dimethylamino antipyrine	58-15-1	231.3	100	9	9	10	10	10	10	10	10	10	12	12	15	17				12.7931	-17.509
				9	11	12	12	13	14	14	14	15	15	15	16	16	17	17	17
andrographolide	5508-58-7	350.45	100	9	12	12	14	14	15	15	16	16	16	16	16	17	18	18		14.4444	-6.86096
				7	9	9	14	14	14	15	16	16	16	16	20
2-benzoylacetanilide	959-66-0	239.27	100	2	9	13	13	13	14	14	15	16	16	16	17	18	19			12.8571	-17.096
				4	8	8	8	11	12	12	12	13	14	14	15	16	18
aspirin	50-78-2	399.44	100	9	11	12	13	13	14	14	14	14	15	16	16	17	18	27		15.5517	0.278877
				6	12	13	13	15	15	16	16	17	17	20	20	22	26
antipyrine	60-80-0	188.23	100	3	4	11	12	12	12	12	13	14	14	14	14	15				12.7692	-17.6629
				3	7	9	14	14	14	15	17	17	18	18	18	18
fenazox	61618-27-7	295.27	100	12	12	13	13	14	15	15	15	15	17	17	18	18	20	24		15.7586	1.61296
				6	8	12	13	15	15	17	17	17	18	19	19	20	23
flurbiprofen	5104-49-4	244.26	100	9	10	11	11	12	12	12	12	17	18	21	21					14.3846	-7.24674
				6	10	10	11	11	13	13	16	17	17	17	17	23	27
rizatriptan benzoate	145202-66-0	391.47	100	8	9	10	10	11	11	11	12	13	13	14	14	15	15			14.8966	-3.94573
				3	13	16	16	17	17	17	17	18	21	21	21	22	22	25
rdea 594	878672-00-5	404.28	100	1	12	12	12	12	13	13	13	13	13	15	15	16	18	19		13.8276	-10.8385
				11	12	13	13	13	13	15	15	16	16	16	16	17	18
metronidazole	443-48-1	171.15	100	7	12	13	13	15	15	15	16	16	16	16	17	19	20	21		15.7	1.23497
				10	12	13	13	15	15	16	16	16	17	17	17	18	21	24
lumefantrine	82186-77-4	528.94	100	7	8	10	10	10	11	11	12	12	12	12	14	17				11.6071	-25.1561
				6	7	8	10	10	11	12	12	13	13	13	14	15	17	18
primaquine diphosphate	63-45-6	455.34	100	9	10	11	11	11	12	12	14	14	16							11	-29.071
				6	7	9	9	10	10	11	11	11	11	12	12	12	13
salinomycin	53003-10-4	772.98	100	8	8	8	8	9	10	12	12	14	14	15	15	16	17	19		13.0385	-15.9269
				7	12	12	14	14	15	15	15	16	17	17
alpha,2-dimethyl-5-nitro-1H-imidazole-1-ethanol	3366-95-8	185.18	100	6	7	12	12	13	13	14	16	16	17	17	18	18				13.1923	-14.9348
				2	6	9	10	10	12	12	14	15	15	19	19	21
niclosamide	50-65-7	327.12	100	6	6	6	10	10	11	11	12	12	15	15	17	17	18			14.6429	-5.58158
				9	9	10	13	17	17	17	20	20	22	22	22	22	24
chlorpropamide	94-20-2	276.74	100	10	11	17	17	17	17	18	20	20	21	22	22	24				17.4286	12.381
				7	14	16	17	17	17	17	17	17	17	19	19	19	19	20
alogliptin benzoate	850649-62-6	461.52	100	9	13	13	14	15	15	16	17	17	17	17	17	17	17			15.3103	-1.27756
				11	12	12	12	14	15	16	16	17	17	17	17	20	20	14
hydrocortisone	50-23-7	362.46	100	9	10	11	14	14	14	14	14	15	15	17	18	19	20			13.9231	-10.2228
				7	8	10	10	13	14	15	15	16	16	17	17
fluocinolone acetonide	67-73-2	512.22	100	13	10	13	14	14	14	15	16	16	16	16	16	17	17	19		16.1	3.81421
				12	13	15	15	16	17	17	17	17	17	18	20	21	21	21
promestriene	39219-28-8	328.49	100	3	8	9	9	9	10	10	11	11	11	12	12	12	14			10.3793	-33.0733
				9	9	10	10	10	10	10	10	11	11	12	12	12	12	12
17a-ethynyl-1,3,5(10)-estratriene-3,17b-diol 3-methyl ether	72-33-3	310.43	100	4	9	9	9	12	13	13	13	13	13	14	14	15	16	17		14.7	-5.21311
				13	14	14	14	15	16	17	17	17	19	19	19	19	21	23
megestrol acetate	595-33-5	384.51	100	4	8	9	10	10	12	12	12	12	13	13	13	13	17	18		11.5417	-25.5783
				6	9	10	11	12	12	12	13	16
17-methyltestosterone	58-18-4	302.45	100	10	11	12	12	13	13	14	15	15	15	16	16	16				14.3929	-7.1936
				11	12	13	14	15	15	15	16	16	16	16	16	16	17	17
estriol	50-27-1	288.38	100	10	13	13	13	14	15	17	17	17	17	17	17	18	18			14.4643	-6.73302
				2	11	12	12	13	13	13	14	14	16	17	17	17	18
raceanisodamine	134355-54-7	335.44	100	10	11	12	12	12	13	13	15	15	16	17	17	17	20	21		16.2759	4.94818
				10	12	13	15	17	17	18	18	20	21	21	22	23	24
mestinon	101-26-8	261.12	100	11	12	12	13	13	14	14	15	17	17	19	22	25				14.3462	-7.49475
				6	7	8	10	12	14	15	16	17	17	17	18	12
glycopyrrolate	596-51-0	398.33	100	6	12	14	14	15	15	17	17	17	17	18	22					14.8462	-4.2707
				8	9	12	12	13	13	15	16	16	17	17	17	18	19
benactyzine hydrochloride	57-37-4	363.88	100	6	6	6	10	11	12	14	16	17	17	18	18	18				13.7407	-11.3985
				8	8	12	13	13	14	14	14	16	17	17	17	17	22
naphazoline	835-31-4	246.74	100	3	7	12	13	15	16	16	16	16	16	17	18	19	21			15.0385	-3.03069
				3	12	15	15	16	16	17	17	17	18	19	21
vitamin B6	8059-24-3	231.14	100	12	12	13	14	15	15	16	16	16	17	17	18	18	20			16.0714	3.62998
				11	14	14	16	16	16	16	17	17	17	18	19	19	21
retinyl acetate	127-47-9	328.49	100	6	12	13	16	16	16	16	16	16	16	18	18	20	20	23		15.7143	1.32709
				8	10	10	15	15	17	17	17	17	17	17	18	20
L-proline	147-85-3/344-25-2	115.13	100	12	12	13	13	16	16	16	17	18	18	18	18	21	21	22		15.8333	2.09472
				12	12	12	12	12	12	13	13	15	15	17	17	18	21	23
propitocaine hydrochloride	1786-81-8	256.77	100	13	13	14	15	16	16	16	18	18	18	19	21	22				16.8519	8.66221
				11	15	15	16	16	16	16	16	17	18	18	20	21	21
proparacaine hydrochloride	1452000	330.85	100	6	7	12	12	12	15	15	15	16	16	16	19	20				14.375	-7.30874
				6	9	11	14	15	15	17	18	18	20	21
atracurium besylate	64228-81-5	1243.48	100	2	12	12	12	13	16	17	17	17	17	20	22					14.4583	-6.7714
				8	10	12	12	12	13	14	16	16	16	19	22
succinylcholine chloride	71-27-2	361.3	100	6	12	12	16	16	16	17	17	17	17	18	20	20	21	20		16.5333	6.60838
				12	12	13	16	16	16	17	17	18	18	18	18	19	19	22
disodium clodronate tetrahydrate	88416-50-6	286.9	100	12	12	13	16	16	16	17	17	18	18	18	20	24	25	26		15.8276	2.05766
				10	12	12	12	12	12	12	12	15	16	16	16	17	17
acetamide	60-35-5	59.07	100	11	12	15	16	16	16	16	18	19	21	21	21	22	24			12.4074	-19.996
				3	7	7	7	7	7	7	7	7	7	7	7	7
D-(-)-penicillamin	52-67-5	149.21	100	12	12	13	14	14	15	15	16	16	16	16	17	17	22			16.3793	5.61523
				13	15	16	16	16	16	16	17	18	18	18	19	20	21	21
latanoprost	130209-82-4	432.59	100	2	2	2	6	10	15	16										11.7143	-24.4653
				4	9	10	10	10	11	13	16	16	17	18	18	19	22
betaxolol hydrochloride	63659-19-8	343.89	100	4	14	15	16	16	16	18	20	20	20	22	23					17.2308	11.1055
				15	15	16	16	16	16	17	17	18	18	18	19	21	22
bromfenac sodium	91714-93-1	356.15	100	10	11	13	13	13	13	16	16	16	16	17	17	18				13.037	-15.936
				2	8	9	10	12	12	12	12	12	12	12	12	19	19
buprofezin	69327-76-0	305.44	100	10	10	10	10	10	12	12	12	12	12	12	14	17	17	18		13.0345	-15.9525
				7	9	9	9	12	12	12	14	16	16	16	17	19	22
oxyquinoline	134-31-6	388.4	100	8	8	12	15	15	16	16	16	16	19							14.3158	-7.69054
				3	3	15	16	17	17	20	20	20
bensulfuron methyl	83055-99-6	410.4	100	16	16	16	18	18	18	18	18	19	19	20	22					15.5185	0.0647642
				7	7	11	12	12	13	13	15	15	16	16	16	16	16	16
roxarsone	121-19-7	263.04	100	4	13	15	15	16	16	16	16	16	17	17	19	19	20			16	3.1694
				8	12	14	16	16	16	16	17	17	17	17	19	19	20	21
tiamulin fumarate	55297-96-6	609.81	100	8	8	8	10	12	15	16	16	17	18	18	21	21	24	24		14.2759	-7.94799
				6	9	9	9	10	12	12	15	15	15	16	16	17	17
sulfaclozine	102-65-8	284.72	100	6	11	12	12	12	13	13	14	14	15	16	16	19				12.9643	-16.4052
				8	8	12	12	12	12	12	13	13	13	13	14	15	15	18
dicyclanil	112636-83-6	190.21	100	2	6	6	9	10	11	11	12	13	15	15	19	20	20	20		14.4828	-6.61391
				11	14	15	16	17	17	17	17	17	17	18	18	18	19
osthole	484-12-8	244.29	100	7	10	10	11	12	13	13	13	15	15	15	16	17	17			15.4074	-0.65169
				9	13	15	15	15	16	17	20	21	21	22	22	26
naringenin	480-41-1	272.25	100	12	12	13	13	13	13	15	15	15	16	16	16	18	18			14.5517	-6.16921
				12	12	13	13	13	13	14	15	15	15	15	16	17	17	17
titanium dioxide	13463-67-7;1317-80-2;1317-70-0	79.87	100	9	12	13	13	15	15	15	18	19	19	20	22					16.2593	4.84113
				8	8	15	15	15	15	15	17	17	17	17	20	22	23	25
synthetic camphor	76-22-2	152.23	100	6	9	13	17	19	20	20	20	20	21	22	22	23	24			17.2414	11.1739
				10	13	14	15	15	15	15	17	17	17	18	19	19	20	20
crotamiton	483-63-6	203.28	100	14	15	17	17	17	17	18	21	21	21	22	22	24	26			17.6897	14.0644
				6	12	12	13	13	13	15	15	15	15	20	20	22	24	26
benzoin tincture	9000-72-0	212.24	100	9	12	12	13	13	15	15	15	15	16	17	17	17	17	17		16.2	4.45902
				15	15	15	15	16	17	17	17	17	17	20	20	21	22	22
vanillin	121-33-5	152.15	100	15	15	16	18	20	20	20	20	22	22	22	22	23	26			18.6552	20.2902
				12	13	16	16	16	17	17	17	17	18	19	20	20	20	22

## Sheet: 3rd round screening
Drug Name	CAS Number	Molecular Number	Concentration (μM)	lifespan of each worm(days)															Mean Lifespan (days)	Lifespan Extension % (of Ctrl)
				1st	2nd	3rd	4th	5th	6th	7th	8th	9th	10th	11th	12th	13th	14th	15th
Control group			0	7	9	9	10	15	15	16	17	19	19	20	21	21	21	22	15.8621
				11	12	12	13	15	15	15	15	16	16	18	20	20	21
				7	9	9	9	9	12	13	15	16	17	19	20	21	22	22
				11	12	12	12	15	17	17	18	20	20	20	21	21	24
oxaliplatin	61825-94-3	395.27	400	10	11	11	12	14	15	15	16	16	16	16	16	16	19	20	16.0339	1.08327
				10	10	12	14	14	14	15	15	15	15	16	16	17	20	23
				9	9	11	15	15	15	18	19	19	19	21	21	21	22	23
				13	14	15	15	16	16	16	16	16	19	20	20	22	22
			100	5	6	8	10	15	15	16	18	19	19	20	21	21	22	22	16.1228	1.64378
				8	10	12	15	16	17	17	18	18	19	20	22	24	25
				5	8	10	10	16	16	16	17	17	18	18	21	25
				4	4	7	13	16	17	17	18	18	19	19	22	22	23	25
			25	13	14	15	15	15	16	16	16	18	19	19	20	20	21	21	18.0508	13.7988
				12	15	15	15	16	16	16	16	18	18	19	20	21	22	23
				12	14	17	17	19	20	20	20	21	21	21	21	21	22
				7	15	17	17	18	18	18	20	20	20	20	22	22	22	23
(+/-)-verapamil hydrochloride	152-11-4	491.06	400	12	15	17	18	19	19	19	20	21	22	22	22	23	23	23	18.9833	19.6775
				12	14	16	17	18	18	19	19	19	19	20	20	22	23	23
				15	16	16	17	18	18	18	18	19	19	19	20	20	20	21
				16	16	16	16	18	19	20	20	21	21	21	21	22	22	22
			100	15	16	16	16	17	18	19	19	19	20	22	22	22	22	23	17.8947	12.8146
				10	14	15	16	16	18	19	19	20	20	21	21	22	22	23
				14	14	15	16	16	16	16	17	19	19	19	19	19
				10	14	14	15	15	17	17	19	19	19	19	19	20	22
			25	11	16	17	19	20	22	22	23	23	23	23	23	23	25		18.4107	16.0675
				12	13	14	17	17	18	19	19	19	21	22	22	23	25
				10	15	15	16	17	18	20	20	22	23	23	23	23
				9	14	14	15	16	16	16	16	16	16	16	16	18	18	19
fosinopril sodium	88889-14-9	586.65	400	15	15	15	15	16	16	16	16	18	20	22	22	22	23		16.9153	6.63965
				7	10	12	13	15	15	16	16	17	18	19	22	22	22	22
				6	10	14	15	15	15	16	17	18	18	19	21	22	23	23
				7	13	14	15	15	15	15	15	16	18	20	20	21	21	24
			100	5	11	13	14	15	15	16	17	17	18	20	22	22	23	23	17.5833	10.8514
				13	16	17	17	18	18	19	20	21	21	21	21	21	21	22
				10	11	12	14	15	16	16	17	17	18	18	20	21	21	21
				13	14	14	16	16	17	18	18	18	18	21	21	22	22	23
			25	9	15	16	17	17	17	17	18	18	18	19	19	21	22	23	16.2373	2.36551
				9	10	13	16	16	16	16	16	17	17	18	19	19	20
				6	10	12	12	14	15	16	16	16	16	18	19	19	21	22
				4	5	16	16	16	17	17	17	17	18	18	19	19	19	20
bismuth potassium citrate	57644-54-9	704.47	400	3	9	9	11	13	13	15	15	15	15	17	19	22			13.6724	-13.8043
				4	10	11	13	14	14	14	14	15	15	15	16	16	22	24
				5	8	9	9	10	10	10	10	10	10	10	10	14	14	15
				9	9	11	14	15	15	15	16	16	19	19	21	21	22	24
			100	14	15	15	15	15	15	16	17	17	19	21	21	23	23	25	17.7636	11.9881
				15	15	15	15	16	17	18	19	19	20	21	21	21
				5	13	13	14	14	17	17	18	19	19	20	20	25
				11	15	16	17	17	18	18	19	20	21	21	21	22	24
			25	15	15	16	16	17	17	17	17	18	19	19	20	20	22		16.6667	5.07246
				9	10	11	12	14	14	14	16	17	17	18	19	19
				12	14	15	15	16	16	16	16	16	16	16	18	21	22	23
				10	13	13	17	17	17	18	18	19	19	19	20	20	20	20
chlorpropamide	94-20-2	276.74	400	7	15	15	15	15	15	15	15	16	16	19	21	21	22		16.8772	6.39969
				8	12	12	14	14	15	15	15	16	16	16	19	22	22
				10	14	15	15	16	16	17	19	20	20	20	21	21	22
				8	13	13	15	16	17	17	21	21	21	22	22	22	22	23
			100	15	15	15	16	17	17	17	18	20	21	21	21	21	22	23	16.7727	5.74111
				10	10	11	14	15	15	15	16	16	19	20	20	21	21
				8	8	8	14	14	14	15	16	17	18	19	20	20	22	23
			25	10	16	16	18	18	19	19	20	22	22	22	22	22	22	24	18.5424	16.8976
				9	13	13	15	15	15	16	17	17	17	17	18	19	19	22
				6	13	16	17	17	19	19	19	20	21	21	22	22	22	23
				16	18	18	19	19	20	21	21	21	21	21	22	23	23
propitocaine hydrochloride	1786-81-8	256.77	400	2	9	10	10	12	15	15	16	16	16	16	17	17	22	29	15.8136	-0.305822
				13	15	15	15	16	16	16	16	17	17	17	18	20	21
				5	9	14	14	15	16	16	16	16	16	17	17	18	18	21
				9	12	14	15	15	15	16	17	17	17	19	20	21	21	23
			100	4	14	15	16	18	19	19	19	19	19	19	20	20	21		18.5	16.6304
				5	14	15	19	21	21	21	21	21	21	21	23	23	23	23
				10	11	15	17	19	19	19	19	19	20	21	21	23
				10	10	16	17	19	19	20	22	22	22	22	22	23	25
			25	13	14	14	15	16	17	18	18	19	19	20	20	21	21	22	17.7	11.587
				12	15	16	16	16	16	16	18	19	20	21	21	22	22	22
				12	13	13	13	13	14	14	15	15	16	16	19	20	20	21
				14	16	16	18	18	18	19	20	20	20	20	22	22	22	24
betaxolol hydrochloride	63659-19-8	343.89	400	14	15	15	15	16	16	17	17	17	17	18	19	20	21	21	16.5085	4.07517
				6	10	13	14	15	15	15	16	16	16	16	16	21	22
				11	11	13	14	15	15	16	16	16	16	18	18	19	20	22
				10	14	15	16	16	16	17	18	18	18	21	21	21	22	22
			100	12	14	17	17	17	17	17	18	18	19	20	21	21	22	22	17.7955	12.1887
				11	11	14	15	15	16	16	17	17	18	18	19	19	19
				14	15	16	16	17	18	19	21	21	21	21	21	22	22	22
			25	7	15	15	17	18	19	19	20	20	20	20	20	20	22	22	18.7667	18.3116
				14	15	15	16	17	17	17	17	18	20	20	21	21	22	24
				12	18	18	19	19	19	19	20	21	21	22	23	24	25	28
				10	13	17	17	18	18	18	18	19	19	20	20	20	21	22
synthetic camphor	76-22-2	152.23	400	10	14	14	15	15	15	16	16	18	20	21	22	22	22	23	17.35	9.38043
				9	12	15	15	16	16	17	17	18	19	20	21	22	22	23
				7	10	13	14	14	16	16	16	16	17	20	21	22	22	24
				12	15	16	16	17	17	17	17	17	18	19	21	22	22	22
			100	9	10	11	11	15	16	16	17	17	17	17	18	18	19	19	17.0536	7.51165
				13	14	15	15	16	19	19	19	19	20	21	21	21
				14	15	17	17	18	19	19	20	21	21	21	21	22
				12	14	14	15	15	15	15	17	17	17	18	19	19	20	21
			25	15	15	15	17	17	18	18	19	19	19	19	21	22	22	23	17.7931	12.1739
				10	16	16	17	18	18	19	19	19	22	22	23	23
				13	13	14	14	16	16	16	17	18	18	18	19	21	22	22
				13	13	14	15	16	16	16	17	17	17	18	19	19	21	23
crotamiton	483-63-6	203.28	400	14	15	15	15	15	16	17	17	17	17	17	17	20	22		16.9483	6.84783
				10	11	15	15	15	15	16	16	17	17	17	21	22	22
				9	14	14	14	15	15	15	16	16	17	17	17	19	21	21
				11	15	16	17	18	18	19	19	19	20	21	21	21	22	23
			100	8	9	10	15	15	17	18	18	19	20	21	21	21	22	23	17.6949	11.5549
				13	15	17	17	18	18	19	19	20	20	21	21	22	24
				5	12	14	15	15	15	16	16	17	18	18	20	20	20	20
				5	15	15	15	17	19	19	21	21	22	22	22	22	22	25
			25	12	13	14	15	17	17	17	19	20	20	20	21	21	21	25	18.2833	15.2645
				7	14	15	17	17	17	18	18	20	20	20	20	20	21	21
				16	17	17	18	19	19	19	20	20	20	22	22	22	23	24
				7	16	16	16	16	17	18	19	19	19	19	19	19	20	22
vanillin	121-33-5	152.15	400	8	9	9	10	10	10	10	13	15	16	16	16	17	17	17	14.3158	-9.74828
				10	10	15	15	15	15	15	15	15	16	16	17	18	19	22
				8	11	14	14	14	15	17	19	19	20	21	21	22	23
				5	6	8	9	9	10	10	10	10	14	18	21	22
			100	7	12	15	15	15	16	17	17	18	18	18	19	20	22		16.4773	3.87846
				6	11	12	14	16	16	17	18	18	19	20	20	20	21	22
				11	11	12	13	15	16	16	17	18	19	19	19	20	20	20
			25	10	16	16	18	19	19	19	19	19	19	20	20	21	22	26	18.5614	17.0175
				11	15	16	16	17	18	19	19	19	19	21	21	21	22
				16	16	18	18	18	18	18	18	19	19	22	23	23	24
				10	15	16	16	16	17	17	18	19	19	20	21	22	25
