# Supplementary material for: Crotamiton derivative JM03 extends lifespan and improves oxidative and hypertonic stress resistance in Caenorhabditis elegans via inhibiting OSM-9
Source: eLife. 2022 May 5;11:e72410. doi: 10.7554/eLife.72410 (PMC9071264; doi:10.7554/eLife.72410)
Supplement: Figure 1—source data 3. [file elife-72410-fig1-data3.xlsx]

## Sheet: Figure 1A
	Strain	Lifespan of each worm (days)																Mean lifespan (days)	Lifespan extension (%)	P values of Ctrl
		Treatment	1	2	3	4	5	6	7	8	9	10	11	12	13	14	15
	N2	Ctrl	10	11	11	11	12	13	14	15	15	15	16	16	22	23	23	16.9467	/	/
			10	10	11	11	12	16	17	19	20	21	21	21	22	22	22
			8	11	11	12	15	15	16	17	18	19	20	22	23	23	24
			8	9	10	11	16	17	18	19	19	19	19	20	22	22	25
			14	15	15	15	16	16	18	19	19	19	20	21	22	23	24
			9	11	12	14	16	18	19	19	19	19	21	22	22	23	23
			8	9	10	11	15	16	17	19	20	21	21	21	22	22	22
			9	11	12	12	15	15	16	17	18	19	19	20	23	23	23
			8	9	9	11	11	17	18	19	19	19	20	20	22	22	24
			11	11	11	11	16	16	17	18	19	19	20	21	21	21	23
		Cro 100 μM	11	17	19	20	20	20	20	20	21	21	21	24	24	24	24	18.6533	10.03	0.0032
			13	14	16	18	19	20	20	20	21	21	22	22	22	23	24
			12	13	14	14	14	17	18	19	20	21	21	23	23	25	25
			9	11	13	14	14	16	17	18	19	20	20	20	21	21	23
			11	13	14	14	16	16	19	20	20	20	21	22	23	23	25
			11	13	13	14	17	18	19	19	19	20	21	21	22	23	23
			12	12	13	14	15	16	18	18	18	19	20	21	22	24	24
			10	10	13	18	18	19	19	19	20	21	22	23	24	24	26
			10	13	14	15	16	16	18	19	19	20	21	21	22	27	28
			13	14	14	14	18	19	19	20	20	21	21	21	22	22	23
		Cro 400 μM	10	10	11	11	13	14	15	17	21	22	22	22	23	24	24	18.9333	10.65	0.0011
			12	12	16	17	18	18	19	20	21	21	22	22	22	22	24
			14	14	15	15	17	17	18	18	20	21	21	22	22	22	27
			10	10	11	16	17	18	21	21	21	22	22	22	23	24	24
			12	16	16	17	18	19	19	20	21	21	21	22	22	23	24
			14	14	15	17	18	19	19	20	20	20	21	22	22	23	26
			10	10	11	14	16	17	18	21	21	22	22	22	23	24	24
			12	16	17	17	18	19	19	20	21	21	22	22	22	23	24
			14	14	15	17	17	19	19	20	20	21	21	22	22	23	27
			9	10	11	16	17	19	20	21	21	21	21	22	22	24	25
			12	16	15	17	17	19	19	20	20	20	21	21	22	23	23
			11	12	12	17	18	19	19	19	19	20	20	20	21	22	22

## Sheet: Figure 1C
	Brood size (# of progeny/worm)
	Treatment	day 2	day 3	day 4	day 5	day 6	day 7	day 8	Total brood size		Total brood size
	Ctrl-1	85	176	49	0	0	0	0	310		Treatment	Mean	SD
	Ctrl-2	50	183	103	0	0	0	0	336		Ctrl	321.125	43.2462
	Ctrl-3	28	173	179	11	0	1	1	393		Cro 400 μM	309.765	23.4007
	Ctrl-4	46	217	88	0	0	0	0	351
	Ctrl-5	52	212	71	0	0	0	0	335
	Ctrl-6	65	169	110	2	0	0	0	346
	Ctrl-7	27	176	71	3	0	0	0	277
	Ctrl-8	38	138	59	4	0	0	0	239
	Ctrl-9	42	148	50	2	0	0	0	242
	Ctrl-10	45	156	123	2	0	0	0	326
	Ctrl-11	57	165	89	0	0	0	0	311
	Ctrl-12	51	198	67	0	0	0	0	316
	Ctrl-13	57	156	156	16	9	0	0	394
	Ctrl-14	48	243	64	2	0	0	0	357
	Ctrl-15	56	155	101	3	0	0	0	315
	Ctrl-16	55	178	56	1	0	0	0	290
	Cro 400 μM-1	57	203	54	1	0	0	0	315
	Cro 400 μM-2	11	176	125	0	0	1	0	313
	Cro 400 μM-3	45	191	96	0	0	0	0	332
	Cro 400 μM-4	35	195	91	4	0	1	0	326
	Cro 400 μM-5	14	206	102	0	0	0	0	322
	Cro 400 μM-6	36	179	54	0	0	0	0	269
	Cro 400 μM-7	15	230	113	0	0	0	0	358
	Cro 400 μM-8	36	203	82	0	0	0	0	321
	Cro 400 μM-9	42	199	68	3	0	0	0	312
	Cro 400 μM-10	20	186	76	0	0	0	0	282
	Cro 400 μM-11	49	169	123	3	0	0	0	344
	Cro 400 μM-12	34	202	65	0	0	0	0	301
	Cro 400 μM-13	14	180	111	4	0	0	0	309
	Cro 400 μM-14	39	181	53	0	0	0	0	273
	Cro 400 μM-15	30	76	132	49	0	0	0	287
	Cro 400 μM-16	41	181	68	1	0	0	0	291
	Cro 400 μM-17	19	172	116	4	0	0	0	311

## Sheet: Figure 1D
	Cell viability (of Ctrl)				Mean	SD
	Treatment	1	2	3
	Ctrl	100	100	100	100	0
	Cro 25 μM	95.9148	106.306	116.696	106.306	8.48404
	Cro 50 μM	97.7798	106.306	125.222	109.769	11.4678
	Cro 100 μM	107.105	105.24	90.0534	100.799	7.63663
	Cro 200 μM	111.101	108.704	107.105	108.97	1.64236
	Cro 400 μM	102.576	104.441	100.711	102.576	1.52277
