# Supplementary material for: Crotamiton derivative JM03 extends lifespan and improves oxidative and hypertonic stress resistance in Caenorhabditis elegans via inhibiting OSM-9
Source: eLife. 2022 May 5;11:e72410. doi: 10.7554/eLife.72410 (PMC9071264; doi:10.7554/eLife.72410)
Supplement: Figure 2—source data 1. [file elife-72410-fig2-data1.xlsx]

## Sheet: Figure 2B
	Strain	Lifespan of each worm (days)																Mean lifespan (days)	Lifespan extension (%)	P values of Ctrl
		Treatment	1	2	3	4	5	6	7	8	9	10	11	12	13	14	15
	N2	Ctrl	13	15	15	15	15	16	16	16	17	17	18	21				17.7381	/	/
			14	15	15	17	18	19	19	19	19	20	21	23	23	23	28
			14	15	16	16	16	16	16	17	17	18	18	19	19	20	21
		Cro 400 μM	15	15	16	17	17	17	17	17	19	19	19	20	23	24		18.878	16.39	<0.0001
			11	16	16	17	18	18	20	20	20	20	20	23	23
			13	16	17	18	18	19	19	20	20	20	20	24	25	28
		JM03 400 μM	15	15	16	17	18	19	20	20	21	21	23	23	23	24	29	21.1778	17.83	<0.0001
			16	16	17	17	18	20	20	22	23	23	23	23	23	24	27
			17	20	20	20	20	20	23	23	23	23	23	24	26	26	29

## Sheet: Figure 2C
	Body bends/30''
	Treatment	day 3	day 8	day 12
	Ctrl-1	78	64	34
	Ctrl-2	76	46	39		Body bends/30''		day 3	day 8	day 12
	Ctrl-3	65	48	45		Ctrl	Mean	75.4667	61	29.8
	Ctrl-4	60	65	14			SD	8.18834	9.95322	14.1242
	Ctrl-5	66	49	20		JM03 400 μM	Mean	81.7333	65.2667	36.5333
	Ctrl-6	71	69	52			SD	13.2688	13.0203	12.5691
	Ctrl-7	82	62	33
	Ctrl-8	75	71	43
	Ctrl-9	78	58	7
	Ctrl-10	66	55	19
	Ctrl-11	87	84	10
	Ctrl-12	76	69	53
	Ctrl-13	84	51	25
	Ctrl-14	89	65	30
	Ctrl-15	79	59	23
	JM03 400 μM-1	78	88	42
	JM03 400 μM-2	80	61	34
	JM03 400 μM-3	78	68	34
	JM03 400 μM-4	100	62	54
	JM03 400 μM-5	58	59	39
	JM03 400 μM-6	67	58	15
	JM03 400 μM-7	89	91	45
	JM03 400 μM-8	92	87	24
	JM03 400 μM-9	82	68	32
	JM03 400 μM-10	67	56	49
	JM03 400 μM-11	83	55	43
	JM03 400 μM-12	64	49	36
	JM03 400 μM-13	85	70	16
	JM03 400 μM-14	104	54	60
	JM03 400 μM-15	99	53	25

## Sheet: Figure 2D
	Pumps/30''
	Treatment	day 3	day 6	day 9	day 12
	Ctrl-1	97	106	53	42
	Ctrl-2	108	98	58	23		Pumps/30''		day 3	day 6	day 9	day 12
	Ctrl-3	114	94	61	14		Ctrl	Mean	114.8	97.1333	61.8	25.8667
	Ctrl-4	119	89	51	37			SD	6.2204	7.49103	8.38411	11.1885
	Ctrl-5	120	95	69	3		JM03 400 μM	Mean	120	97.6667	72.9333	36.2667
	Ctrl-6	124	96	63	10			SD	4.19524	8.19485	10.0762	17.6199
	Ctrl-7	115	91	62	17
	Ctrl-8	118	90	58	21
	Ctrl-9	112	97	76	33
	Ctrl-10	114	119	74	35
	Ctrl-11	110	105	66	26
	Ctrl-12	115	95	45	40
	Ctrl-13	119	94	72	21
	Ctrl-14	118	97	62	35
	Ctrl-15	119	91	57	31
	JM03 400 μM-1	121	112	60	46
	JM03 400 μM-2	116	100	59	54
	JM03 400 μM-3	122	91	69	27
	JM03 400 μM-4	123	95	74	34
	JM03 400 μM-5	116	98	67	75
	JM03 400 μM-6	112	88	83	22
	JM03 400 μM-7	120	101	87	11
	JM03 400 μM-8	122	84	74	52
	JM03 400 μM-9	122	100	79	13
	JM03 400 μM-10	123	92	68	44
	JM03 400 μM-11	114	115	89	54
	JM03 400 μM-12	120	90	58	16
	JM03 400 μM-13	127	96	64	21
	JM03 400 μM-14	126	98	86	36
	JM03 400 μM-15	116	105	77	39

## Sheet: Figure 2E
		Brood size (# of progeny/worm)
		Treatment	day 2	day 3	day 4	day 5	day 6	day 7	day 8	Total brood size
		Ctrl-1	40	161	98	0	0	0	1	300		Total brood size
		Ctrl-2	46	147	90	4	0	0	0	287		Treatment	Mean	SD
		Ctrl-3	26	141	78	0	0	0	0	245		Ctrl	257.882	36.4157
		Ctrl-4	31	142	44	0	0	0	0	217		JM03 400 μM	242	41.5677
		Ctrl-5	33	139	150	0	2	0	1	325
		Ctrl-6	43	124	93	0	3	1	2	266
		Ctrl-7	40	150	63	1	0	0	0	254
		Ctrl-8	46	166	30	6	0	0	0	248
		Ctrl-9	24	124	62	9	7	2	1	229
		Ctrl-10	30	133	50	1	0	0	0	214
		Ctrl-11	23	118	115	1	2	0	0	259
		Ctrl-12	33	128	47	2	0	0	0	210
		Ctrl-13	35	144	112	4	0	0	1	296
		Ctrl-14	33	137	148	0	0	0	0	318
		Ctrl-15	30	125	89	1	0	0	0	245
		Ctrl-16	26	120	57	0	0	0	0	203
		Ctrl-17	32	139	91	4	1	0	1	268
		JM03 400 μM-1	7	49	117	22	0	0	0	195
		JM03 400 μM-2	16	105	134	0	0	0	0	255
		JM03 400 μM-3	17	119	93	0	0	0	0	229
		JM03 400 μM-4	25	121	81	8	0	0	0	235
		JM03 400 μM-5	13	103	152	7	0	0	0	275
		JM03 400 μM-6	26	124	89	2	3	1	1	246
		JM03 400 μM-7	21	107	108	0	0	0	0	236
		JM03 400 μM-8	37	136	120	1	0	0	0	294
		JM03 400 μM-9	2	111	100	0	0	0	0	213
		JM03 400 μM-10	21	126	114	16	0	0	0	277
		JM03 400 μM-11	28	70	89	25	2	0	0	214
		JM03 400 μM-12	24	119	115	0	0	0	0	258
		JM03 400 μM-13	28	138	116	8	15	2	0	307
		JM03 400 μM-14	8	80	86	3	0	0	0	177
		JM03 400 μM-15	1	58	102	1	0	0	0	162
		JM03 400 μM-16	32	135	132	0	0	0	0	299

## Sheet: Figure 2F
	Cell viability (of Ctrl)				Mean	SD
	Treatment	1	2	3
	Ctrl	100	100	100	100	0
	JM03 25 μM	101.542	106.542	105.875	104.653	2.21666
	JM03 50 μM	109.875	116.542	113.875	113.431	2.73974
	JM03 100 μM	107.458	103.583	98.7917	103.278	3.54474
	JM03 200 μM	95.2083	106.333	96.375	99.3056	4.99216
	JM03 400 μM	98.375	103.792	103.292	101.819	2.44413
