# Supplementary material for: Crotamiton derivative JM03 extends lifespan and improves oxidative and hypertonic stress resistance in Caenorhabditis elegans via inhibiting OSM-9
Source: eLife. 2022 May 5;11:e72410. doi: 10.7554/eLife.72410 (PMC9071264; doi:10.7554/eLife.72410)
Supplement: Figure 3—source data 1. [file elife-72410-fig3-data1.xlsx]

## Sheet: Figure 3A and 3B
	RNAi	Lifespan of each worm (days)																Mean lifespan (days)	Lifespan extension (%)	P values of Ctrl
		Treatment	1	2	3	4	5	6	7	8	9	10	11	12	13	14	15
	Empty vector	Ctrl	7	10	11	11	11	12	13	15	15	16	18	20	22	22	24	13.6867	/	/
			8	8	10	10	11	11	12	12	14	16	16	17	17	18	20
			8	9	12	14	14	14	15	15	15	15	15	17	18	19	22
			8	9	9	11	11	11	11	13	15	16	16	16	17	18	18
			9	9	9	11	12	13	13	14	14	15	16	17	18	19	21
			8	9	11	11	13	13	14	14	14	14	15	16	18	18	23
			9	10	11	11	12	13	14	14	14	14	16	16	16	17	18
			9	9	10	10	10	10	11	11	11	12	13	16	18	19	21
			5	8	9	9	10	10	11	14	16	16	17	17	18	18	23
			9	9	10	10	11	11	11	13	13	14	14	14	15	16	18
		JM03 400 μM	11	12	14	14	15	15	16	16	16	16	16	16	18	20	23	15.5772	13.88 (of Empty vector Ctrl)	0.0002
			11	13	14	14	14	16	16	17	17	18	18	18	19	19	21
			14	14	14	15	15	15	16	16	16	18	20	23	23	24
			8	10	14	14	15	15	15	16	16	17	18	18	21	22	25
			9	13	14	15	15	15	15	15	15	16	16	16	17	18	22
			8	9	10	10	13	14	15	16	16	16	16	17	18	19	20
			10	10	10	11	14	15	15	15	15	16	17	17	17	18	18
			9	9	10	12	12	13	14	15	16	16	18	19	19	24	25
			8	10	10	10	11	14	14	16	16	17	17	18	18	19	19
			9	11	14	15	16	16	16	16	16	16	16	19	19	19	19
	osm-9 RNAi	Ctrl	9	9	9	11	12	12	14	16	16	17	18	23				15.0876	10.23 (of Empty vector Ctrl)	0.0028 (of Empty vector Ctrl)
			10	11	13	14	15	16	17	18	18	19	20	23	25	25	27
			8	10	10	12	13	14	15	15	16	16	17	18	21
			9	10	10	11	12	14	14	14	14	15	16	18	20
			8	9	9	10	10	12	14	15	16	16	16	18	21	22
			11	12	14	15	16	16	17	18	18	21	27	27
			9	9	11	11	11	11	12	13	14	15	16	19	19	23	24
			8	9	11	11	11	12	13	14	15	15	16	16	16	16	18
			8	10	10	11	11	12	12	13	16	16	17	22	24	25	26
			11	11	14	14	15	15	15	16	16	19	20	21	22
		JM03 400 μM	9	10	12	12	12	14	14	15	15	17	17	18	18	21	22	15.2806	1.26 (of osm-9 RNAi Ctrl)	0.9708 (of osm-9 RNAi Ctrl)
			8	8	9	12	14	15	16	17	18	19	19	25
			8	9	9	10	12	13	13	14	15	15	16	18	20
			8	14	14	15	15	17	17	17	18	18	18	20	23	26
			11	11	11	11	14	14	15	15	16	17	17	18	21	23
			8	9	10	11	11	12	14	14	15	15	16	17	17	17
			8	10	14	15	16	16	18	18	18	20	21	26	27
			9	11	12	12	13	13	14	17	18	19	19	20	21	22
			9	10	11	11	13	14	15	17	17	17	18	18	19	22	22
			9	10	12	14	14	15	15	16	16	16	17	17	18	18	19
	ocr-2 RNAi	Ctrl	8	11	13	16	16	16	16	17	18	18	20	20	22	24		14.8467	8.47 (of Empty vector Ctrl)	0.0084 (of Empty vector Ctrl)
			9	11	15	15	15	16	16	16	17	17	18	18	21	22	23
			8	9	10	11	11	11	16	17	18	20	23	24	24
			8	10	10	11	11	12	13	16	16	17	18	19	25
			10	10	10	11	11	14	14	15	15	16	16	16	17	18
			8	10	10	12	13	13	15	15	16	16	19	19	25	26
			9	10	11	11	12	12	13	14	16	17	18	19	19	19	20
			10	10	11	11	11	12	12	13	14	14	15	16	16	18	18
			9	10	11	13	15	15	15	15	15	16	16	18	21
			8	9	9	10	10	10	10	14	14	22	26
		JM03 400 μM	10	11	11	14	15	15	15	15	17	18	19	20	23	23	25	16.2797	9.63 (of ocr-2 RNAi Ctrl)	0.0259 (of ocr-2 RNAi Ctrl)
			10	11	13	14	14	15	15	16	16	17	18	19
			14	14	14	16	16	16	18	19	20	21	24	25	26
			12	14	14	14	15	15	16	17	18	18	21
			10	10	14	14	15	15	15	15	16	17
			10	12	12	14	15	15	18	19	19	19	20	22
			9	11	11	11	11	12	13	14	14	17	18	19	19	22	25
			9	10	10	11	13	13	14	15	17	18	19	21	23	25	27
			12	14	15	15	15	15	15	16	18	18	19	19	24	26	27

## Sheet: Figure 3C
	Strain	Lifespan of each worm (days)																Mean lifespan (days)	Lifespan extension (%)	P values of Ctrl
		Treatment	1	2	3	4	5	6	7	8	9	10	11	12	13	14	15
	N2	Ctrl	8	13	13	13	14	14	14	14	15	15	16	17	17	19	20	14.7987	/	/
			12	12	12	12	13	13	14	14	14	15	16	16	17	19	20
			8	10	12	12	13	13	13	15	16	17	17	18	19	19	21
			12	12	12	12	13	13	13	13	14	15	15	17	17	17	17
			8	12	12	13	13	13	13	14	16	16	16	16	17	19	19
			8	12	12	13	13	13	13	14	14	15	17	17	17	19
			10	10	12	13	13	14	15	15	16	17	17	18	18	19	19
			10	12	12	12	13	13	15	15	15	17	17	18	19	19	21
			12	12	13	13	14	15	15	15	15	16	17	18	19	19	22
			10	10	10	10	12	13	14	15	16	16	18	18	19	22	23
		JM03 400 μM	12	13	13	14	14	15	15	15	17	17	17	19	19	20	20	16.8041	13.51(of N2 Ctrl)	<0.0001 (of N2 Ctrl)
			10	13	13	13	15	16	17	17	18	18	19	19	19	20	20
			12	13	14	14	15	15	15	16	17	18	18	19	21	21
			12	12	15	15	17	17	18	18	18	19	19	19	21	22	22
			14	14	15	16	16	17	17	18	18	19	19	19	19	23	23
			12	13	13	13	13	14	15	15	15	17	18	18	19	20	20
			12	12	13	14	14	14	14	15	15	16	17	19	20	20	20
			13	13	14	15	17	17	19	19	19	21	21	22	22	24	25
			10	12	14	15	15	16	16	17	17	17	17	18	18	19	19
			14	15	15	15	15	15	16	17	19	19	19	19	26	26
	osm-9(ky10)	Ctrl	12	13	13	14	15	16	17	18	19	19	20	23	26			17.5259	18.45 (of N2 Ctrl)	<0.0001 (of N2 Ctrl)
			10	13	13	16	18	18	19	25	28
			13	13	15	15	15	15	18	18	19	19	19	19	20	20
			12	12	13	13	17	17	18	18	21	21	22	25
			14	14	16	17	17	19	20	23	26
			13	13	13	14	15	16	17	19	19	22	22
			11	12	12	13	13	13	15	16	20	21	23	24	24
			15	15	15	16	16	17	18	19	19	20	21	21	23	25	27
			10	13	13	16	16	17	19	20	20	21	24
			13	13	15	17	18	19	19	21	24
		JM03 400 μM	12	15	18	18	19	19	20	21								17.2128	-1.83 (of osm-9 mutant Ctrl)	0.7713 (of osm-9 mutant Ctrl)
			13	15	15	15	16	16	17	17	17	18	18	23	25
			12	13	13	13	15	15	16	17	19	27
			11	12	13	16	19	24	26
			12	13	13	18	19	20	22	24
			10	12	13	13	15	15	18	19	19	19
			13	13	15	15	15	17	18	20	23
			10	13	13	14	17	17	18	18	21	23	26	28
			10	10	13	18	19	20	23	23
			13	13	17	18	20	21	22	24	25

## Sheet: Figure 3D and 3E
	Relative gene expression
	Gene	Treatment	1	2	3	4	Mean	SD
	osm-9	Empty vector	1.09749	0.895744	1.07715	0.957045	1.00686	0.0836394
		osm-9 RNAi	0.0516975	0.0412419	0.0459574	0.0496171	0.0471284	0.00397152
	ocr-2	Empty vector	0.977445	0.928956	1.12501	0.993541	1.00624	0.0725787
		ocr-2 RNAi	0.0557099	0.0434368	0.0548213	0.0495825	0.0508876	0.0048976
