# Supplementary material for: Crotamiton derivative JM03 extends lifespan and improves oxidative and hypertonic stress resistance in Caenorhabditis elegans via inhibiting OSM-9
Source: eLife. 2022 May 5;11:e72410. doi: 10.7554/eLife.72410 (PMC9071264; doi:10.7554/eLife.72410)
Supplement: Figure 4—source data 1. [file elife-72410-fig4-data1.xlsx]

## Sheet: Figure 4A
	Strain	Lifespan of each worm (hours)									Mean lifespan (hours)
		Treatment	1	2	3	4	5	6	7	8
	N2	Ctrl	8	11	11	11	11	11	14	38	17.0781
			8	11	11	11	11	14	14	14
			11	14	14	14	14	17	38	42
			14	14	14	32	38	38	42	45
			8	11	11	11	14	32	45	45
			8	8	11	11	11	11	11	11
			8	8	11	11	11	11	14	14
			11	11	11	11	14	14	17	47
		Cro	14	14	14	14	14	14	17	20	16.6875
			8	11	11	11	11	11	14	14
			8	8	11	11	11	11	14	14
			8	11	11	14	14	17	20	42
			8	14	14	17	17	20	23	32
			11	11	14	14	14	14	14	14
			11	14	14	14	14	17	17	45
			11	11	14	14	38	38	54	54
		JM03 400 μM	14	14	14	14	14	14	17	60	23.0938
			8	11	11	17	17	32	54	54
			14	14	17	17	20	20	20	38
			11	14	17	17	17	17	20	38
			8	14	14	14	14	17	17	17
			17	17	17	20	20	42	45	54
			14	17	23	23	23	32	60	66
			14	14	14	17	20	38	38	42

## Sheet: Figure 4B
	Strain	Lifespan of each worm (hours)							Mean lifespan (hours)
		Treatment	1	2	3	4	5	6
	N2	Ctrl	6	6	7	8	23	23	13.4722
			5	6	7	8	9	13
			5	7	8	14	25	25
			6	6	6	7	10	23
			5	7	7	13	13	23
			5	6	7	8	23	29
			5	6	6	7	7	25
			6	6	6	8	9	23
			7	8	9	25	30	33
			6	8	11	14	23	25
			6	7	11	14	23	31
			10	23	23	30	34	36
		JM03 400 μM	7	7	9	11	13	29	19.0278
			8	10	10	11	12	34
			7	7	23	32	50	51
			7	8	11	12	13	29
			10	11	32	47	50	53
			9	9	10	11	14	30
			8	9	10	13	23	23
			8	9	23	23	23	30
			6	7	11	11	23	37
			7	14	14	23	23	47
			7	23	23	25	25	30
			6	7	9	13	33	47
	osm-9(ky10)	Ctrl	12	24	24	25	25	32	27.4028
			10	23	25	25	33	34
			5	30	32	35	36	52
			9	11	13	34	34	37
			7	12	14	23	23	25
			23	25	25	25	31	31
			14	23	23	23	47	54
			6	11	30	35	47	47
			32	36	37	47	47	50
			7	8	10	32	34	37
			6	8	9	11	47	55
			24	31	32	35	47	47
		JM03 400 μM	9	25	32	32	36	47	27.4722
			30	31	47	47	47	50
			7	8	11	24	32	35
			6	31	35	35	47	50
			10	13	34	37	47	50
			10	10	13	14	24	47
			10	10	23	23	23	47
			8	11	12	23	23	23
			10	10	23	37	47	54
			9	23	30	34	35	47
			8	11	23	30	33	56
			9	11	25	25	34	55

## Sheet: Figure 4C
	Strain	Lifespan of each worm (hours)							Mean lifespan (hours)
		Treatment	1	2	3	4	5	6
	N2	Ctrl	10	10	14	18	22	26	18.0556
			6	6	10	14	18	26
			6	10	14	18	26	26
			6	6	6	10	22	34
			14	18	18	26	26	30
			6	6	10	14	26	30
			6	6	10	22	22	26
			10	14	14	18	18	22
			10	10	10	26	30	34
			10	14	18	18	26	26
			10	14	14	22	26	38
			14	18	26	30	34	46
		JM03 400 μM	10	18	18	26	26	30	24.75
			14	26	30	30	34	38
			10	18	30	34	62	58
			10	18	18	22	26	30
			10	14	34	50	62	62
			10	14	14	22	26	30
			10	10	22	16	26	26
			6	18	22	26	30	34
			6	14	18	18	30	30
			10	14	26	26	34	50
			10	18	22	26	30	38
			6	10	14	18	34	50
	ocr-2(ak47)	Ctrl	14	14	18	22	26	34	17.0556
			6	6	10	10	22	26
			14	14	18	18	22	26
			6	14	14	18	18	46
			6	10	14	14	18	26
			6	6	10	14	22	30
			6	6	6	10	26	34
			6	10	18	22	26	26
			10	10	10	10	14	14
			10	10	10	14	14	42
			6	6	14	18	22	26
			10	14	22	26	38	50
		JM03 400 μM	14	22	26	30	30	34	22.9444
			14	22	28	30	34	38
			14	26	34	34	42	42
			6	14	10	34	42	62
			6	6	14	22	54	62
			10	10	14	18	30	34
			6	10	10	18	18	22
			6	10	14	26	30	26
			10	10	14	26	34	54
			6	10	10	14	30	50
			10	14	18	18	26	32
			10	10	18	22	22	26

## Sheet: Figure 4D
	Strain	Motile time of each worm (min)
		Treatment	1	2	3	4	5	6	7	8	9	10	11	12	13	14	15	16	17	18	19	20	21	22	23	24	25	26	27	28	29	30	31	32	33	34	35	36	37	38	39	40	41	42	43	44	45	46	47
	N2	Ctrl	3	5	5	5	5	9	9	9	9	9	9	9	11	11	11	11	11	13	15	15	3	5	5	7	7	7	9	9	9	9	9	9	9	11	11	11	11	11	13	15	7	7	7	7	7	9	9
		Cro 400μM	3	5	5	5	7	7	7	7	9	9	9	9	11	11	11	13	13	15	15	15	5	5	5	7	7	7	9	9	9	11	11	13	13	13	13	15	15	17	19	19	5	5	7	7	9	9	9
		JM03 400μM	9	9	9	9	9	9	9	9	11	13	13	13	13	13	13	17	19	21	23	23	7	9	9	9	9	11	13	13	15	15	15	15	17	17	17	17	19	19	23	23	11	11	11	11	11	13	13
[truncated: 14 more columns]

## Sheet: Figure 4E and 4F
	Strain	Motile time of each worm (min)																					Mean motile time (min)
		Treatment	1	2	3	4	5	6	7	8	9	10	11	12	13	14	15	16	17	18	19	20
	N2	Ctrl	5	5	5	5	7	7	7	7	7	7	7	7	9	9	9	9	9	9	11	11	7.66667
			3	5	5	5	5	5	7	7	7	7	7	7	7	7	7	9	9	11	13	17
			3	5	5	5	5	5	7	7	7	7	7	7	9	9	9	9	11	11	15	15
		JM03 400 μM	5	5	5	5	7	7	7	7	9	9	9	9	9	11	15	15	17	17	19	21	11.3333
			5	7	7	7	9	9	9	9	9	11	11	11	11	11	13	15	17	17	19	21
			7	9	9	9	9	9	11	11	11	11	11	13	13	13	13	15	15	17	19	19
	osm-9(ky10)	Ctrl	5	7	7	7	7	7	7	9	9	9	9	11	11	11	11	13	13	15	17	19	9.1
			5	5	5	5	7	7	7	9	9	9	9	9	9	11	11	11	13	13	15	17
			3	5	5	5	5	7	7	7	7	7	7	7	9	9	9	9	11	11	11	15
		JM03 400 μM	5	7	9	9	9	9	11	11	11	11	11	13	13	13	15	17	17	17	17	19	10.6333
			5	5	7	7	7	7	7	9	9	9	9	11	11	11	11	11	13	13	13	15
			5	5	5	5	5	7	7	7	7	9	9	9	11	13	15	15	15	17	19	19
	ocr-2(ak47)	Ctrl	3	5	5	5	5	5	5	5	7	7	7	7	7	9	9	9	9	9	9	11	7.13333
			5	5	5	5	5	7	7	7	7	7	7	7	9	9	9	9	9	11	13	13
			3	5	5	5	5	5	5	5	5	7	7	7	7	7	7	9	9	9	11	11
		JM03 400 μM	5	5	5	7	7	7	9	9	9	11	11	11	11	13	13	15	15	15	17	19	9.76667
			3	5	7	7	7	7	9	9	9	9	11	11	11	11	13	13	15	15	15	17
			3	5	5	5	5	7	7	7	7	7	9	9	9	11	11	11	11	13	13	13
