# Supplementary material for: Crotamiton derivative JM03 extends lifespan and improves oxidative and hypertonic stress resistance in Caenorhabditis elegans via inhibiting OSM-9
Source: eLife. 2022 May 5;11:e72410. doi: 10.7554/eLife.72410 (PMC9071264; doi:10.7554/eLife.72410)
Supplement: Figure 5—source data 1. [file elife-72410-fig5-data1.xlsx]

## Sheet: Figure 5A
	Cell viability (of Ctrl)				Mean	SD
	Treatment	1	2	3
	Ctrl	100	100	100	100	0
	JM03 25 μM	98.375	103.792	103.292	101.819	2.44413
	JM03 50 μM	95.2083	106.333	96.375	99.3056	4.99216
	JM03 100 μM	107.458	103.583	98.7917	103.278	3.54474
	JM03 200 μM	109.875	116.542	113.875	113.431	2.73974
	JM03 400 μM	101.542	106.542	105.875	104.653	2.21666

## Sheet: Figure 5B
	Relative gene expression
	Gene	Treatment	1	2	3	Mean	SD
	B2M	Ctrl	0.99089	0.99807	1.01115	1.00004	0.0083872
		JM03 400 μM	1.00643	0.98536	1.0084	1.00006	0.0104279
	Psmb1	Ctrl	1.02455	1.00951	0.96685	1.0003	0.024439
		JM03 400 μM	1.09082	1.12283	1.0325	1.08205	0.0373948
	Psmb2	Ctrl	1.02013	0.9591	1.02208	1.00044	0.0292403
		JM03 400 μM	1.04522	1.0323	0.907	0.99484	0.0623358
	Hsf1	Ctrl	0.93521	1.05336	1.01511	1.00123	0.0492234
		JM03 400 μM	1.01158	1.10464	1.0661	1.06077	0.0381778
	Clusterin	Ctrl	0.91926	1.06222	1.02412	1.00187	0.0604472
		JM03 400 μM	1.41226	1.09194	1.2995	1.2679	0.132665
	Nrf2	Ctrl	0.92197	1.06844	1.01516	1.00186	0.0605315
		JM03 400 μM	1.06846	1.34337	1.1761	1.19598	0.113108
	Keap1	Ctrl	0.97662	1.01077	1.01303	1.00014	0.0166567
		JM03 400 μM	1.4601	1.34465	1.2568	1.35385	0.0832514
	Nqo1	Ctrl	1.00034	1.01235	0.98747	1.00005	0.0101592
		JM03 400 μM	2.78851	2.86523	2.4723	2.70868	0.170055
	Txnrd1	Ctrl	1.0536	0.97664	0.97182	1.00069	0.0374671
		JM03 400 μM	1.96569	1.74512	1.9569	1.88924	0.101969

## Sheet: Figure 5C
	Strain	Motile time of each worm (min)																														Mean motile time (min)
		Treatment	1	2	3	4	5	6	7	8	9	10	11	12	13	14	15	16	17	18	19	20	21	22	23	24	25	26	27	28	29
	N2	Ctrl	3	3	3	3	3	3	5	5	5	5	5	5	5	5	7	7	7	7												6.04762
			3	3	5	5	5	5	5	7	7	7	7	7	9	9	13	15
			3	3	5	5	5	5	5	7	7	7	7	9	15
			3	3	3	5	5	5	5	5	5	5	5	7	7	9	11	17
		JM03 400 μM	7	9	11	11	11	11	11	11	11	13	13	13	13	13	13	13	13	15	15	15	15	17	23	23	23	23				11.6512
			3	5	9	9	9	9	9	11	11	11	13	15	15	15	19	19	23	23	23	23
			5	7	7	7	7	7	7	9	9	9	9	9	9	11	15	17	17
			5	5	5	5	5	7	7	7	7	7	7	7	9	9	9	9	9	9	11	13	15	17	17
	AM140	Ctrl	3	5	5	5	5	7	7	7	7	7	7	7	7	7	7	7	11	11	11											6.28889
			3	3	3	3	3	3	3	5	5	5	5	7	7	7	7	7	7	7	9	9	9	11	11	11	11	11	11	13
			3	3	3	3	3	3	3	3	5	5	5	5	5	5	7	7	7	7	7	7	7	7	7	7	9	9
			3	3	3	3	5	5	5	5	5	5	5	5	5	5	9	11	13
		JM03 400 μM	7	9	9	9	9	9	9	11	11	11	11	11	11	13	13	13	13	13	13	15	17	19								9.45977
			3	3	3	3	3	3	5	5	5	5	5	7	7	7	9	9	9	9	9	9	9	13	13	17
			5	7	7	7	7	7	7	7	7	9	9	9	9	9	9	9	11	11	11	11	11	11	13	13	13	15	15	15	17
			3	3	7	7	9	9	9	9	11	11	13	15

## Sheet: Figure 5D
	Number of Q35::YFP aggregates of each worm
	Worm	Ctrl	JM03 400 μM
	1	50	26
	2	44	32
	3	44	39
	4	40	40
	5	49	35
	6	37	41
	7	51	31
	8	45	26
	9	51	31
	10	50	33
	11	54	39
	12	47	39
	13	45	32
	14	44	34
	15	39	32
	16	46	24
	17	42	30
	18	39	28
	19	43	31
	20	30	33
	21	49	34
	22	52	26
	23	45	37
	24	40	30
	25	48	28
	26	35	35
	27	40	35
	28	36	45
	29	36	41
	30	36	41
	31	39	33
	32	34	32
	33	49	36
	34	38	36
	35	41	31
	36	44	33
	37	36	31
	38	44	35
	39	39	31
	40	34	32
	41	39	39
	42	49	26
	43	41	20
	44	42	26
	45	48	26
	46	40	34
	47	39	31
	48	42	31
	49	42	30
	50	50	25
	51	38	28
	52	39	32
	53	38	34
	54	50	25
	55	41	29
	56	43	20
	57	43	36
	58	36	35
	59	45	36
	60	35	31
	61		28
	62		32
	63		34
	64		29
	65		32
	Mean	42.4167	32.1077

## Sheet: Figure 5E
	Gene ID	Gene	N2 Ctrl			Mean N2 Ctrl	N2 JM03 400 μM			osm-9(ky10) Ctrl			osm-9(ky10) JM03 400 μM			N2 Ctrl/Mean N2 Ctrl			N2 JM03/Mean N2 Ctrl			osm-9(ky10) Ctrl/Mean N2 Ctrl			osm-9(ky10) JM03/Mean N2 Ctrl
	WBGene00000176	aqp-8	102.29	130.28	114.68	115.75	98.2	126.57	129.44	57.12	77.43	80.46	98.68	112.38	106.45	0.883715	1.12553	0.990756	0.84838	1.09348	1.11827	0.493477	0.668942	0.695119	0.852527	0.970886	0.919654
	WBGene00000781	cpr-1	624.23	567.27	553.5	581.667	689.24	672.37	707.14	596.9	696.12	792.39	1027.13	1188.25	842.29	1.07317	0.975249	0.951576	1.18494	1.15594	1.21571	1.02619	1.19677	1.36228	1.76584	2.04284	1.44806
	WBGene00006713	ubc-18	10.92	16.3	15.29	14.17	15.49	15.28	12.96	14.55	10.72	12.85	14.91	14.94	14.5	0.770642	1.15032	1.07904	1.09315	1.07833	0.914608	1.02682	0.756528	0.906845	1.05222	1.05434	1.02329
	WBGene00006702	ubc-3	7.5	6.81	7.44	7.25	8.77	8.76	7.05	8.24	5.31	9.07	5.51	6.89	6.99	1.03448	0.93931	1.02621	1.20966	1.20828	0.972414	1.13655	0.732414	1.25103	0.76	0.950345	0.964138
	WBGene00006912	vha-3	88.1	114.08	104.11	102.097	121.28	125.66	111.47	70.79	76.72	90.92	86.2	87.38	93.75	0.862908	1.11737	1.01972	1.18789	1.23079	1.09181	0.693362	0.751445	0.890529	0.844298	0.855856	0.918247
	WBGene00018474	cnep-1	31.62	45.32	37.82	38.2533	42.03	43.16	33.96	40.61	36.67	41.07	44.65	42.96	43.47	0.826595	1.18473	0.988672	1.09873	1.12827	0.887766	1.06161	0.958609	1.07363	1.16722	1.12304	1.13637
	WBGene00021369	siah-1	40.18	38.92	54.78	44.6267	51.07	43.73	34.92	57.33	42.63	57.28	39.23	36.12	37.89	0.900359	0.872124	1.22752	1.14438	0.979907	0.782492	1.28466	0.955258	1.28354	0.879071	0.809382	0.849044
	WBGene00007055	tag-196	21.11	36.42	32	29.8433	35.89	33.1	22.12	33.4	33.59	27.25	36.74	28.48	33.61	0.707361	1.22037	1.07227	1.20261	1.10913	0.741204	1.11918	1.12554	0.913102	1.2311	0.954317	1.12621
	WBGene00022069	eel-1	35.58	38.01	33.58	35.7233	34.53	37.64	37.41	35.1	23.07	31.75	31.81	34.96	34.62	0.995988	1.06401	0.940002	0.966595	1.05365	1.04721	0.982551	0.645796	0.888775	0.890454	0.978632	0.969114
	WBGene00020509	hex-1	67.56	74.04	76.57	72.7233	119.56	101	97.79	41.4	46.01	54.72	83.17	72.88	71.47	0.929	1.01811	1.05289	1.64404	1.38883	1.34469	0.569281	0.632672	0.752441	1.14365	1.00215	0.982766
	WBGene00010769	asah-1	93.66	78.04	71.64	81.1133	111.2	136.76	167.89	28.89	41.2	42.56	87.96	117.95	78.01	1.15468	0.962111	0.883209	1.37092	1.68604	2.06982	0.356168	0.507931	0.524698	1.08441	1.45414	0.961741
	WBGene00000545	clp-4	15.06	17.59	17.83	16.8267	16.55	15	15.73	17.5	12	14.88	14.08	14.08	14.34	0.895008	1.04536	1.05963	0.983558	0.891442	0.934826	1.04002	0.713154	0.884311	0.836767	0.836767	0.852219
	WBGene00002232	kpc-1	6.01	7.91	8.27	7.39667	9.1	7.9	6.31	6.92	5.48	6.24	6.59	5.82	6.22	0.812528	1.0694	1.11807	1.23028	1.06805	0.853087	0.935557	0.740874	0.843623	0.890942	0.786841	0.840919
	WBGene00006786	unc-51	18.16	20.43	22.25	20.28	20.27	20.12	22.29	15.98	12.07	17.02	17.73	17.66	16.48	0.895464	1.0074	1.09714	0.999507	0.99211	1.09911	0.787968	0.595168	0.83925	0.87426	0.870809	0.812623
	WBGene00022751	srp-2	9.48	12.77	10.53	10.9267	12.35	13.57	13.22	8.3	10.54	9.23	10.92	14.26	12.66	0.867602	1.1687	0.963697	1.13026	1.24192	1.20988	0.75961	0.964613	0.844722	0.99939	1.30506	1.15863
	WBGene00006606	tra-3	10.26	14.19	13.82	12.7567	15.09	15.84	11.22	11.46	11.01	12.37	12.53	14.07	13.19	0.804285	1.11236	1.08336	1.18291	1.2417	0.87954	0.898354	0.863078	0.969689	0.982232	1.10295	1.03397
	WBGene00000074	adm-2	6.17	7.34	7.38	6.96333	6.32	6.41	5.65	7.92	5.61	6.5	6.95	6.43	6.3	0.88607	1.05409	1.05984	0.907611	0.920536	0.811393	1.13739	0.805649	0.933461	0.998085	0.923408	0.904739
	WBGene00015926	C17H11.6	8.86	10.8	10.1	9.92	12.82	11.91	10.1	10.7	9.23	10.66	10.83	10.19	9.21	0.893145	1.08871	1.01815	1.29234	1.2006	1.01815	1.07863	0.930444	1.0746	1.09173	1.02722	0.928427
	WBGene00001059	dpf-6	1.47	2.83	2.68	2.32667	3.3	2.75	1.56	1.39	1.79	1.41	2.66	1.52	1.44	0.631805	1.21633	1.15186	1.41834	1.18195	0.670487	0.597421	0.769341	0.606017	1.14327	0.653295	0.618911
	WBGene00006591	toh-1	5.96	5.97	6.05	5.99333	7.72	7.22	6.42	6.02	6.04	5.86	7.23	6.42	7.7	0.994438	0.996107	1.00945	1.2881	1.20467	1.07119	1.00445	1.00779	0.977753	1.20634	1.07119	1.28476
	WBGene00014171	nep-26	1.42	1.65	1.55	1.54	1.73	1.68	1.31	1.8	1.18	1.53	1.2	1.4	1.21	0.922078	1.07143	1.00649	1.12338	1.09091	0.850649	1.16883	0.766234	0.993506	0.779221	0.909091	0.785714
	WBGene00012796	Y43F4A.1	0.92	1.23	1.19	1.11333	1.26	1.51	0.93	0.79	0.51	0.56	1.04	0.99	0.96	0.826347	1.10479	1.06886	1.13174	1.35629	0.835329	0.709581	0.458084	0.502994	0.934132	0.889222	0.862275
	WBGene00000082	adt-1	0.11	0.24	0.22	0.19	0.29	0.26	0.14	0.08	0.06	0.07	0.05	0.11	0.17	0.578947	1.26316	1.15789	1.52632	1.36842	0.736842	0.421053	0.315789	0.368421	0.263158	0.578947	0.894737
	WBGene00001169	eef-1A.2	488.75	473.06	487.76	483.19	494.09	471.2	507.37	411.09	301.42	438.17	405.5	404.94	401.74	1.01151	0.979035	1.00946	1.02256	0.975186	1.05004	0.850783	0.623813	0.906828	0.839214	0.838055	0.831433
	WBGene00006331	sup-26	129.66	130.31	122.96	127.643	133.97	135.69	134.9	94.07	80.02	96.29	100.95	95.63	97.65	1.0158	1.02089	0.963309	1.04957	1.06304	1.05685	0.736975	0.626903	0.754368	0.790876	0.749197	0.765022
	WBGene00001433	fkb-8	100.2	98.79	103.79	100.927	99.7	103.65	104.17	70.55	80.41	89.5	75.72	83.77	83.56	0.9928	0.97883	1.02837	0.987846	1.02698	1.03214	0.699022	0.796717	0.886782	0.750248	0.830009	0.827928
	WBGene00001430	fkb-5	18.81	22.84	21.66	21.1033	23.5	23.82	22.82	19.02	18.86	14.41	18.96	19.56	25.18	0.891328	1.08229	1.02638	1.11357	1.12873	1.08135	0.901279	0.893698	0.682831	0.898436	0.926868	1.19318
	WBGene00000882	cyn-6	25.72	28.44	25.07	26.41	33.72	31.07	26.67	23.92	26.81	22	26.56	27.24	27.29	0.973874	1.07686	0.949262	1.27679	1.17645	1.00984	0.905718	1.01515	0.833018	1.00568	1.03143	1.03332
	WBGene00001428	fkb-3	8.98	15.63	13.15	12.5867	15.26	14.68	8.97	8.62	12.03	8.61	13.74	13.14	15.07	0.713453	1.24179	1.04476	1.21239	1.16631	0.712659	0.684852	0.955773	0.684057	1.09163	1.04396	1.1973
	WBGene00001429	fkb-4	0.43	0.56	0.6	0.53	0.55	0.66	0.53	0.54	0.67	0.45	0.51	0.76	0.79	0.811321	1.0566	1.13208	1.03774	1.24528	1	1.01887	1.26415	0.849057	0.962264	1.43396	1.49057
	WBGene00000894	dab-1	122.82	146.92	142.23	137.323	158.81	160.52	144.48	128.46	110.3	138.48	145.58	155.11	154.12	0.894386	1.06988	1.03573	1.15647	1.16892	1.05212	0.935456	0.803214	1.00842	1.06013	1.12952	1.12231
	WBGene00012230	cacn-1	62.73	85.73	81.42	76.6267	81.68	77.08	64.03	77.83	68.97	73.59	73.11	76.95	69.03	0.818645	1.1188	1.06255	1.06595	1.00592	0.83561	1.0157	0.900078	0.960371	0.954106	1.00422	0.900861
	WBGene00012316	ctps-1	58.12	66.76	60.59	61.8233	58.97	65.99	53.85	65.81	61.3	63.66	64.63	71.69	68.88	0.940098	1.07985	0.980051	0.953847	1.0674	0.87103	1.06448	0.991535	1.02971	1.0454	1.15959	1.11414
	WBGene00011831	T19B10.2	86.18	73.46	81.63	80.4233	135.4	98.7	122.49	54.95	52.98	64.11	72.02	64.93	70.03	1.07158	0.913417	1.015	1.68359	1.22726	1.52307	0.683259	0.658764	0.797157	0.895511	0.807353	0.870767
	WBGene00003048	lit-1	30.17	34.37	34.72	33.0867	35.6	37.57	34.16	34.42	23.71	31.54	31.27	32.76	32.64	0.911848	1.03879	1.04937	1.07596	1.1355	1.03244	1.0403	0.716603	0.953254	0.945094	0.990127	0.9865
	WBGene00012326	W07E11.1	24.34	27.74	25.57	25.8833	27.72	26.94	27.45	22.68	16.77	25.09	24.18	25.67	25.23	0.940373	1.07173	0.987894	1.07096	1.04082	1.06053	0.87624	0.647907	0.96935	0.934192	0.991758	0.974759
	WBGene00003599	nhl-3	11.6	11.15	11.51	11.42	12.31	10.89	9.64	10.7	11.97	11.12	9.9	11.7	10.68	1.01576	0.976357	1.00788	1.07793	0.95359	0.844133	0.936953	1.04816	0.97373	0.8669	1.02452	0.935201
	WBGene00023405	sor-1	10.21	12.68	11.84	11.5767	11.75	12.05	11.13	9.66	8.03	9.63	9.58	9.93	9.15	0.881946	1.09531	1.02275	1.01497	1.04089	0.961417	0.834437	0.693637	0.831846	0.827527	0.85776	0.790383
	WBGene00015298	C01F1.3	5.14	6.11	5.4	5.55	6.66	7.34	6.51	6.59	3.34	3.75	4.76	5.85	5	0.926126	1.1009	0.972973	1.2	1.32252	1.17297	1.18739	0.601802	0.675676	0.857658	1.05405	0.900901
	WBGene00004210	ptc-3	5.3	6.01	5.87	5.72667	11.2	11.31	11.88	5.1	4.22	5.28	8.01	8.72	8.26	0.925495	1.04948	1.02503	1.95576	1.97497	2.07451	0.89057	0.736903	0.922002	1.39872	1.5227	1.44237
	WBGene00018572	lin-42	2.56	3.36	5.08	3.66667	6.31	4.23	4.44	4.43	2.09	3.12	4.17	3.77	4.64	0.698182	0.916364	1.38545	1.72091	1.15364	1.21091	1.20818	0.57	0.850909	1.13727	1.02818	1.26545
	WBGene00021095	mlt-8	6.75	5.9	6.39	6.34667	11.31	7.29	7.25	2.95	3.35	2.92	3.16	3.45	3.98	1.06355	0.929622	1.00683	1.78204	1.14863	1.14233	0.464811	0.527836	0.460084	0.497899	0.543592	0.627101
	WBGene00044623	bus-8	1.05	1.13	1.05	1.07667	1.77	1.08	0.88	1.82	0.48	0.96	0.96	0.63	0.88	0.975232	1.04954	0.975232	1.64396	1.0031	0.817337	1.6904	0.44582	0.891641	0.891641	0.585139	0.817337
	WBGene00019759	M03F4.6	0.77	1	1.18	0.983333	1.19	1.02	0.98	0.77	0.73	0.44	0.55	0.57	0.85	0.783051	1.01695	1.2	1.21017	1.03729	0.99661	0.783051	0.742373	0.447458	0.559322	0.579661	0.864407
	WBGene00012433	Y11D7A.9	0.6	0.59	0.71	0.633333	0.85	0.95	1.15	0.6	0.22	0.12	0.6	0.55	0.98	0.947368	0.931579	1.12105	1.34211	1.5	1.81579	0.947368	0.347368	0.189474	0.947368	0.868421	1.54737
	WBGene00022816	fbn-1	1.82	2.45	1.97	2.08	3.09	3.33	1.91	1.23	0.98	0.94	1.15	1.22	1.41	0.875	1.17788	0.947115	1.48558	1.60096	0.918269	0.591346	0.471154	0.451923	0.552885	0.586538	0.677885
	WBGene00001570	gei-13	0.64	0.72	0.93	0.763333	0.58	0.63	0.58	0.51	0.5	0.35	0.6	0.45	0.6	0.838428	0.943231	1.21834	0.759825	0.825328	0.759825	0.668122	0.655022	0.458515	0.786026	0.58952	0.786026
	WBGene00002282	let-4	1.16	1.62	1.58	1.45333	1.24	1.56	0.56	1.11	0.83	0.84	0.85	0.65	1.01	0.798165	1.11468	1.08716	0.853211	1.07339	0.385321	0.763761	0.571101	0.577982	0.584862	0.447248	0.694954
	WBGene00000749	col-176	0.99	1.84	2.31	1.71333	7.76	3.38	2.64	2.5	0.78	0.44	1.87	0.44	1.08	0.577821	1.07393	1.34825	4.52918	1.97276	1.54086	1.45914	0.455253	0.256809	1.09144	0.256809	0.63035
	WBGene00000663	col-88	7.31	5.84	27.98	13.71	21.71	22.17	16.96	1.9	0.05	0	0.1	6.69	13.65	0.533187	0.425966	2.04085	1.58352	1.61707	1.23705	0.138585	0.00364697	0	0.00729395	0.487965	0.995624
