# Supplementary material for: Crotamiton derivative JM03 extends lifespan and improves oxidative and hypertonic stress resistance in Caenorhabditis elegans via inhibiting OSM-9
Source: eLife. 2022 May 5;11:e72410. doi: 10.7554/eLife.72410 (PMC9071264; doi:10.7554/eLife.72410)
Supplement: Figure 6—source data 1. [file elife-72410-fig6-data1.xlsx]

## Sheet: Figure 5A
	Strain	Lifespan of each worm (days)																Mean lifespan (days)	Lifespan extension (%)	P values of Ctrl
		Treatment	1	2	3	4	5	6	7	8	9	10	11	12	13	14	15
	N2	Ctrl	11	12	12	17	18	19	19	19	20	22	22	22	23	23	25	18.3826	/	/
			15	15	15	17	18	19	19	19	19	20	20	20	21	22	24
			12	12	13	14	17	18	18	18	19	21	22	22	22	23	23
			11	12	12	13	15	17	18	18	19	19	20	21	22	25	25
			11	15	16	16	17	18	18	18	19	19	19	20	20	20
			11	12	13	15	16	19	19	19	20	20	20	20	22	22	23
			12	15	15	17	18	19	19	21	21	23	23	23	24	25	25
			12	12	14	14	15	17	18	18	18	19	20	23	23	23	23
			13	13	14	15	15	15	15	17	18	18	20	20	23	23	23
			11	11	12	15	16	18	18	19	22	22	23	23	23	25	25
		JM03 400 μM	15	17	18	19	20	21	21	22	22	23	23	23	23	24	24	19.3154	5.11 (of N2 Ctrl)	0.0569 (of N2 Ctrl)
			11	12	14	14	18	18	18	19	19	19	22	23	23	24	24
			12	13	18	18	19	19	19	20	20	21	22	22	23	25	27
			12	13	15	17	18	19	19	21	23	23	23	23	23	24	25
			11	14	15	15	16	18	19	19	20	20	21	22	23	23	23
			13	14	15	17	18	18	19	19	19	20	21	21	21	22	22
			12	12	15	17	18	19	20	21	21	22	22	23	25	26	27
			12	12	15	17	17	18	19	20	20	20	21	22	25	26
			12	15	15	15	17	18	18	19	19	22	22	22	23	23	23
			15	15	16	18	18	18	18	18	18	19	20	20	21	23	27
	skn-1(zu135)	Ctrl	11	11	11	12	12	13	14	14	14	14	14	15	15	16	16	13.1905	-28.23 (of N2 Ctrl)	<0.0001 (of N2 Ctrl)
			10	10	11	11	11	12	12	13	13	14	14	15	15	16	16
			11	11	11	11	11	11	12	13	14	14	15	15	16	17	18
			10	11	11	11	12	12	12	12	13	14	14	15	16	16	16
			11	11	12	12	12	12	12	13	14	14	15	16	17	18	18
			11	11	11	11	11	12	13	13	14	14	14	14	15	16	16
			10	11	12	12	12	12	12	13	13	14	14	14	14	14	15
		JM03 400 μM	10	11	11	11	11	11	12	12	12	13	13	13	14	14	18	13.3583	1.29 (of skn-1 mutant Ctrl)	0.2973 (of skn-1 mutant Ctrl)
			11	11	12	12	12	12	13	13	14	15	15	16	16	16	16
			11	11	11	11	12	12	12	13	13	14	14	14	14	16	16
			10	11	12	12	12	13	14	14	14	15	15	15	16	18	18
			10	11	11	11	11	12	12	14	14	15	15	15	15	15	16
			11	11	11	12	12	13	14	14	14	14	14	15	16	17	17
			11	12	12	12	12	14	14	14	14	14	14	15	16	16	16
			10	11	11	12	12	12	13	13	13	14	15	16	16	17	17

## Sheet: Figure 5B
	Gene ID	Gene	Ctrl			Mean Ctrl	JM03 400 μM			Ctrl/Mean Ctrl			JM03/Mean Ctrl
	WBGene00004804	skn-1	96.55	92.83	17.61	68.9967	104.7	100.49	105.64	1.39934	1.34543	0.25523	1.51746	1.45645	1.53109
	WBGene00001752	gst-4	12.12	4.98	4.25	7.11667	14.65	10.7	17.55	1.70304	0.699766	0.59719	2.05855	1.50351	2.46604
	WBGene00001754	gst-6	8.9	2.63	2.66	4.73	8.9	7.47	12.69	1.88161	0.556025	0.562368	1.88161	1.57928	2.68288
	WBGene00001755	gst-7	191.92	157.53	219.15	189.533	239.84	196.78	238.42	1.01259	0.831147	1.15626	1.26542	1.03823	1.25793
	WBGene00001758	gst-10	19.66	6.53	17.8	14.6633	13.9	14.72	24.03	1.34076	0.445328	1.21391	0.947943	1.00386	1.63878
	WBGene00001527	gcs-1	43.8	49.96	9.4	34.3867	42.09	46.15	40.74	1.27375	1.45289	0.273362	1.22402	1.34209	1.18476
	WBGene00000831	ctl-2	41.08	21.12	7.76	23.32	53.5	43.08	45.39	1.76158	0.90566	0.332762	2.29417	1.84734	1.9464
	WBGene00011110	prdx-3	188.85	205.88	106.7	167.143	207.03	184.69	187.68	1.12987	1.23176	0.638374	1.23864	1.10498	1.12287
	WBGene00003473	mtl-1	169.58	92.01	134.7	132.097	457.77	405.28	419.03	1.28376	0.696535	1.01971	3.46542	3.06806	3.17215

## Sheet: Figure 5C
	Mean fluorescence intensity of each worm			Mean Ctrl	Fluorescence intensity of Mean Ctrl
	Worm	Ctrl	JM03 400 μM		Ctrl/Mean Ctrl	JM03 400 μM/Mean Ctrl
	1	20.907	24.62	25.4677	82.0921	96.6713
	2	22.353	24.982		87.7698	98.0927
	3	24.847	31.3		97.5626	122.901
	4	24.248	27.557		95.2106	108.204
	5	25.466	28.416		99.9931	111.576
	6	27.131	34.628		106.531	135.968
	7	22.55	29.959		88.5434	117.635
	8	26.097	27.391		102.471	107.552
	9	28.026	30.116		110.045	118.252
	10	25.674	26.354		100.81	103.48
	11	23.814	32.1		93.5065	126.042
	12	23.429	38.571		91.9948	151.45
	13	18.3	35.702		71.8556	140.185
	14	21.555	34.85		84.6365	136.84
	15	26.359	29.787		103.5	116.96
	16	23.494	31.487		92.25	123.635
	17	21.646	31.656		84.9938	124.298
	18	28.164	34.6		110.587	135.858
	19	24.748	27.466		97.1739	107.846
	20	21.948	36.871		86.1796	144.775
	21	24.183	37.107		94.9554	145.702
	22	21.624	35.768		84.9074	140.444
	23	23.745	25.381		93.2356	99.6594
	24	18.835	40.175		73.9563	157.749
	25	24.311	28.993		95.458	113.842
	26	24.961	38.975		98.0102	153.037
	27	27.211	29.558		106.845	116.061
	28	26.572	39.555		104.336	155.314
	29	29.223	36.314		114.745	142.588
	30	23.573	35.204		92.5602	138.23
	31	29.246	36.864		114.835	144.748
	32	30.643	48.151		120.321	189.067
	33	28.575	41.118		112.201	161.451
	34	29.135	34.148		114.4	134.083
	35	28.752	38.339		112.896	150.539
	36	25.573	26.653		100.413	104.654
	37	24.271	42.126		95.3009	165.409
	38	23.179	40.559		91.0132	159.256
	39	27.109	42.521		106.444	166.96
	40	25.91	36.998		101.737	145.274
	41	25.132	35.15		98.6817	138.018
	42	25.71			100.951
	43	21.631			84.9349
	44	26.255			103.091
	45	26.176			102.781
	46	29.789			116.968
	47	30.971			121.609
	48	30.674			120.443
	49	30.274			118.872
	50	26.964			105.875
	51	27.892			109.519

## Sheet: Figure 5D
	Relative gene expression
	Gene	Treatment	1	2	3	4	Mean	SD
	skn-1	Ctrl	0.860678	0.970047	1.09234	1.09792	1.00525	0.0978699
		JM03 400 μM	3.25388	3.51246	3.76495	3.84193	3.5933	0.230771
	gst-4	Ctrl	1.01615	1.03138	1.045	0.911836	1.00109	0.0525324
		JM03 400 μM	1.23239	1.34093	1.28743	1.471	1.33294	0.0884692
	gst-6	Ctrl	0.826044	1.02381	1.05067	1.1245	1.00626	0.110385
		JM03 400 μM	1.21382	1.30477	1.31003	1.29173	1.28009	0.0388334
	gst-7	Ctrl	0.864271	1.03538	1.07285	1.04105	1.00339	0.0815783
		JM03 400 μM	1.69504	1.63968	1.64153	1.68783	1.66602	0.025553
	gst-10	Ctrl	1.00518	1.07432	1.04187	0.888063	1.00236	0.0703748
		JM03 400 μM	0.880257	1.19328	0.992811	1.03635	1.02568	0.112286
	gcs-1	Ctrl	0.990306	0.929347	1.06847	1.01699	1.00128	0.0501409
		JM03 400 μM	2.22027	2.51288	2.39225	2.50166	2.40676	0.117533
	ctl-2	Ctrl	0.972091	1.14719	0.959778	0.933961	1.00326	0.0842339
		JM03 400 μM	0.981191	1.2536	1.05125	1.09686	1.09573	0.100029
	prdx-3	Ctrl	0.997427	0.957227	1.07876	0.97199	1.00135	0.0469487
		JM03 400 μM	0.985991	1.48935	1.41804	1.73123	1.40615	0.26892
	mtl-1	Ctrl	1.04001	1.04929	0.936136	0.979135	1.00114	0.0462035
		JM03 400 μM	2.82961	3.28651	3.12279	3.56746	3.20159	0.267232

## Sheet: Figure 5E
	Mean fluorescence intensity of each worm			Mean Ctrl	Fluorescence intensity of Mean Ctrl
	Worm	Ctrl	JM03 400 μM		Ctrl/Mean Ctrl	JM03 400 μM/Mean Ctrl
	1	50.357	107.734	55.1666	91.2817	195.288
	2	46.135	80.513		83.6285	145.945
	3	61.556	59.272		111.582	107.442
	4	66.661	57.684		120.836	104.563
	5	55.197	79.421		100.055	143.966
	6	60.65	41.284		109.94	74.8351
	7	70.969	61.615		128.645	111.689
	8	80.507	55.235		145.934	100.124
	9	53.842	63.093		97.5989	114.368
	10	64.506	81.607		116.929	147.928
	11	75.162	45.947		136.245	83.2877
	12	56.516	44.592		102.446	80.8315
	13	53.073	57.617		96.2049	104.442
	14	59.231	49.578		107.367	89.8696
	15	52.588	58.129		95.3258	105.37
	16	55.27	50.308		100.187	91.1928
	17	82.177	52.545		148.961	95.2478
	18	43.052	63.855		78.04	115.749
	19	41.785	56.439		75.7433	102.306
	20	69.77	60.185		126.471	109.097
	21	67.787	62.642		122.877	113.551
	22	70.969	69.759		128.645	126.451
	23	72.946	62.735		132.229	113.719
	24	84.246	64.635		152.712	117.163
	25	60.831	75.455		110.268	136.777
	26	62.463	92.304		113.226	167.319
	27	39.548	74.191		71.6883	134.485
	28	41.643	60.637		75.4859	109.916
	29	49.408	55.927		89.5614	101.378
	30	63.751	55.295		115.561	100.233
	31	51.375	72.652		93.127	131.696
	32	35.438	83.004		64.2381	150.461
	33	52.339	58.728		94.8744	106.456
	34	58.686	52.307		106.38	94.8164
	35	57.411	60.233		104.068	109.184
	36	53.971	48.749		97.8327	88.3669
	37	68.721	55.753		124.57	101.063
	38	50.703	44.654		91.9089	80.9439
	39	51.28	43.117		92.9548	78.1578
	40	43.084	43.157		78.098	78.2303
	41	53.236	56.689		96.5004	102.76
	42	46.53	48.59		84.3445	88.0786
	43	53.055	55.916		96.1723	101.358
	44	51.534	45.41		93.4152	82.3143
	45	49.586	58.439		89.8841	105.932
	46	52.366	61.3		94.9234	111.118
	47	43.034	61.933		78.0073	112.265
	48	38.627	68.19		70.0188	123.607
	49	51.203	56.295		92.8152	102.045
	50	54.372	64.262		98.5596	116.487
	51	37.918	78.644		68.7336	142.557
	52	54.288	71.906		98.4073	130.343
	53	52.19	49.266		94.6043	89.304
	54	52.96	57.468		96.0001	104.172
	55	65.468	60.562		118.673	109.78
	56	63.335	65.719		114.807	119.128
	57	68.762	80.104		124.644	145.204
	58	56.788	62.361		102.939	113.041
	59	54.262	76.275		98.3602	138.263
	60	55.36	68.288		100.351	123.785
	61	54.903	61.461		99.5222	111.41
	62	33.32	51.537		60.3988	93.4206
	63	63.226	58.714		114.609	106.43
	64	40.125	74.913		72.7342	135.794
	65	45.166	67.931		81.872	123.138
	66	47.076	90.856		85.3342	164.694
	67	53.156	69.328		96.3554	125.67
	68	53.073	74.023		96.2049	134.181
	69	43.5	79.374		78.852	143.881
	70	61.328	64.659		111.169	117.207
	71	37.051	83.369		67.162	151.122
	72	57.337	81.892		103.934	148.445
	73	43.256	64.415		78.4097	116.764
	74	63.525	55.273		115.151	100.193
	75	50.976	62.899		92.4037	114.016
	76		67.823			122.942
	77		75.877			137.542
	78		83.915			152.112
	79		71.621			129.827
	80		101.561			184.099
	81		74.87			135.716
	82		64.685			117.254
	83		67.301			121.996
	84		55.174			100.013
	85		63.148			114.468
	86		81.218			147.223
	87		84.237			152.696
	88		62.972			114.149
	89		50.534			91.6025
	90		68.508			124.184
	91		53.396			96.7904
	92		51.417			93.2031
	93		51.691			93.6998
	94		40.457			73.336

## Sheet: Figure 5F
	Strain	Lifespan of each worm (hours)								Mean lifespan (hours)
		Treatment	1	2	3	4	5	6	7
	N2	Ctrl	8	14	14	14	34	44	54	23.8571
			12	14	14	24	24	34	34
			12	12	12	34	34	44	54
			8	8	24	24	34	34	44
			6	10	14	24	24	34	44
			8	10	14	24	24	34	34
			12	24	24	24	34	44	44
			8	8	10	12	14	24	34
		JM03 400 μM	12	12	14	34	34	44	54	31.2143
			12	14	14	24	34	44	54
			10	14	24	34	34	54	54
			14	24	24	24	34	54	54
			12	34	34	44	44	64	64
			12	24	24	24	34	44	54
			10	24	24	34	34	34	54
			10	12	12	24	24	44	44
	skn-1(zu135)	Ctrl	4	5	5	6	6	12	16	7.67857
			4	4	6	7	8	10	10
			4	6	6	6	7	10	14
			4	4	5	6	8	9	10
			4	5	5	6	8	16	12
			5	5	7	8	10	12	14
			5	5	5	5	6	10	12
			5	6	6	8	10	12	16
		JM03 400 μM	4	4	5	7	7	12	14	7.125
			4	4	4	5	5	6	12
			4	4	5	6	6	7	12
			4	5	5	6	7	8	10
			4	5	5	6	7	8	12
			5	6	7	8	8	12	16
			4	4	5	7	8	12	14
			5	6	6	7	8	10	12
